# Supplementary material for: Quantum mechanics/molecular mechanics studies on excited state decay pathways of 5-azacytosine in aqueous solution
Source: Royal Society of Chemistry journal article supplement (doi:10.1039/d2cp03661d), 2022-01-01
Supplement: d2cp03661d1.pdf [file d2cp03661d1.pdf]

## Quantum mechanics/molecular mechanics studies on excited state decay pathways of 5-azacytosine in aqueous solution

Xue-Ping Chang,<sup>a\*</sup> Lingyun Zheng,<sup>a</sup> Li Yu,<sup>a</sup> Teng-Shuo Zhang<sup>b</sup> and Bin-Bin Xie<sup>c</sup>

<sup>a</sup> College of Chemistry and Chemical Engineering, Xinyang Normal University, Xinyang 464000, P. R. China

<sup>b</sup> College of Chemical Engineering, Zhejiang University of Technology, Hangzhou 310014, P. R. China

<sup>c</sup> Hangzhou Institute of Advanced Studies, Zhejiang Normal University, Hangzhou 311231, P. R. China.

E-mail: [xuepingchang@xynu.edu.cn](mailto:xuepingchang@xynu.edu.cn)

### Contents

1. Active Orbitals
2. Bond-Lengths of Minima and Intersection Structures
3. QM(CASSCF)/MM Optimized Intersection Structures
4. QM(CASPT2)/MM Computed LIICs
5. Tables
6. QM(CASPT2)/MM Computed Relaxation Pathways II' and III'
7. Cartesian Coordinates of All Computed Structures

## 1. Active Orbitals

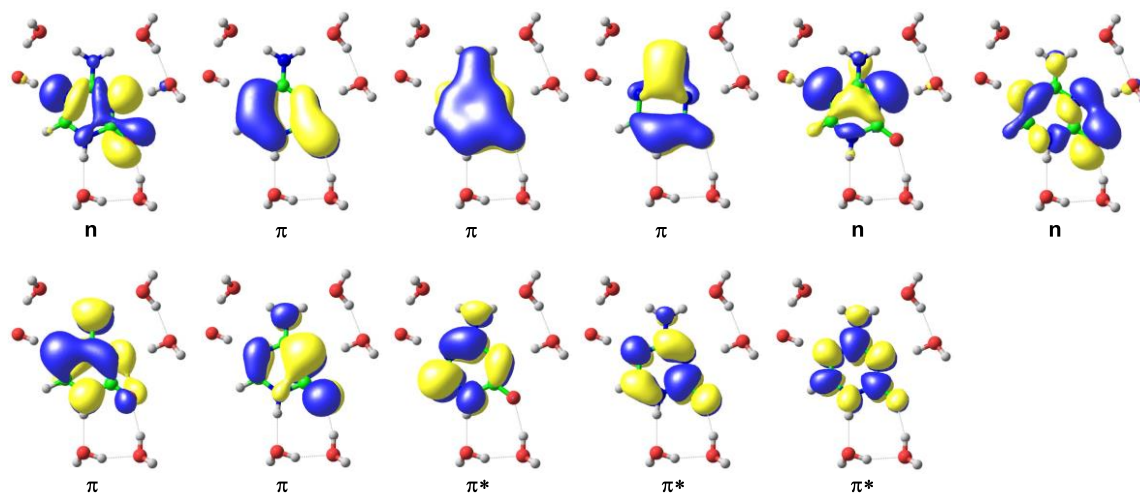

Figure S1. Molecular orbitals (MOs) included in the active space used for QM/MM calculations.

## 2. Bond-Lengths of Minima and Intersection Structures

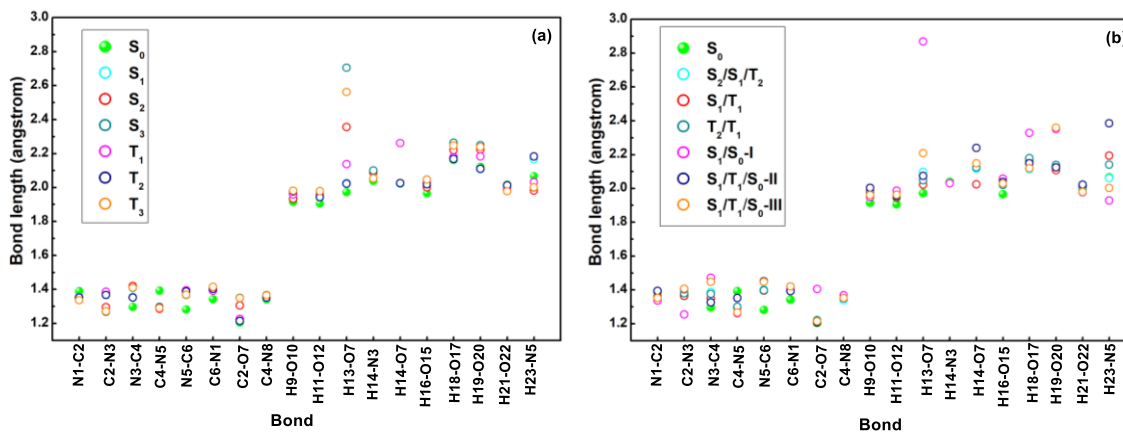

Figure S2. QM(CASSCF)/MM computed bond-lengths (in Å) of (a) minima and (b) conical intersections and crossing points in and between S<sub>0</sub>, S<sub>1</sub>, S<sub>2</sub>, S<sub>3</sub>, T<sub>1</sub>, T<sub>2</sub>, and T<sub>3</sub> states.

### 3. QM(CASSCF)/MM Optimized Intersection Structures

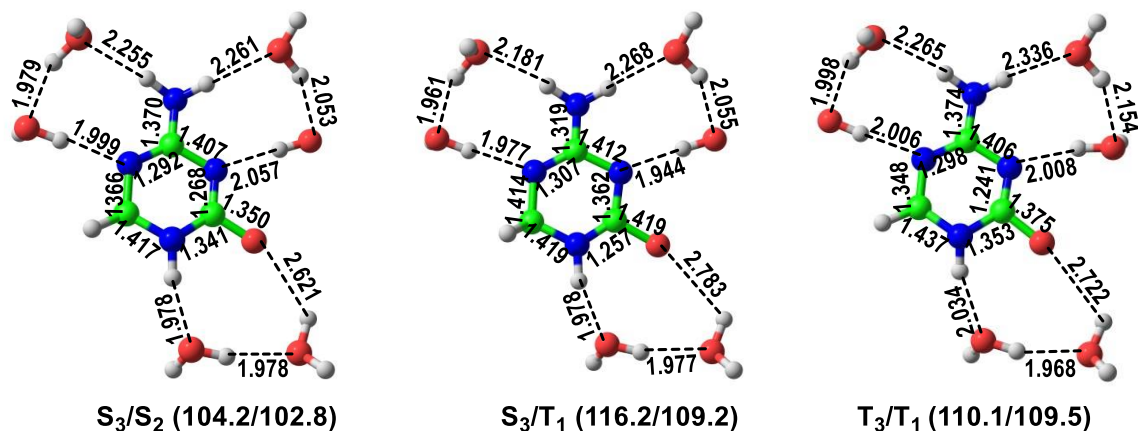

**Figure S3.** QM(CASSCF)/MM optimized minimum-energy conical intersections and crossing points between  $S_3$ ,  $S_2$ , and  $T_1$  states together with relative energies in kcal/mol at the QM(CASPT2)/MM level.

### 4. QM(CASPT2)/MM Computed LIICs

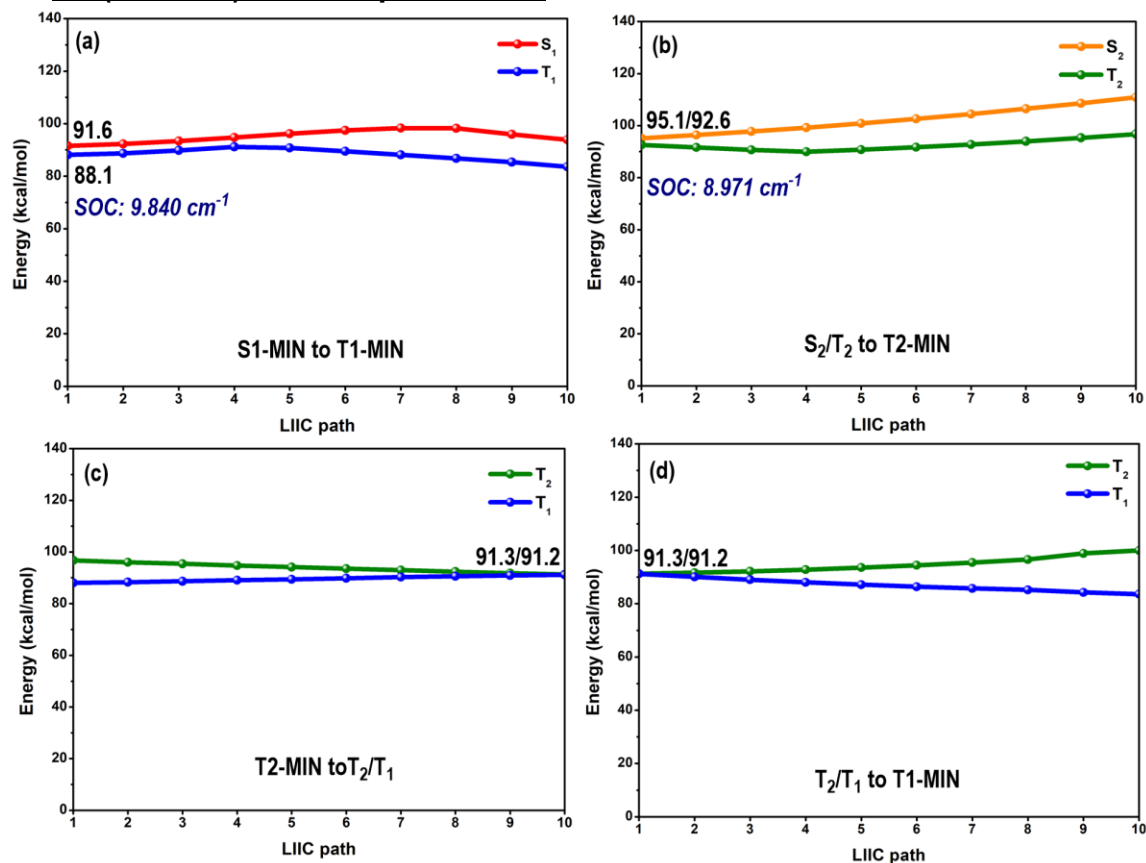

**Figure S4.** QM(CASPT2)/MM computed LIICs (in kcal/mol) connecting (a)  $S_1$ -MIN and  $T_1$ -MIN, (b)  $S_2/T_2$  and T2-MIN, (c) T2-MIN and  $T_2/T_1$ , and (d)  $T_2/T_1$  and T1-MIN.

## 5. Tables

**Table S1:** Optimized geometrical parameters of  $S_0$  minimum of 5-AC

|       | This work | DFT <sup>a</sup> | CASSCF <sup>b</sup> | CASSCF <sup>c</sup> |
|-------|-----------|------------------|---------------------|---------------------|
| N1-C2 | 1.389     | 1.417            | 1.403               | 1.403               |
| C2-N3 | 1.366     | 1.362            | 1.386               | 1.349               |
| N3-C4 | 1.298     | 1.333            | 1.281               | 1.288               |
| C4-N5 | 1.393     | 1.385            | 1.397               | 1.346               |
| N5-C6 | 1.282     | 1.304            | 1.279               | 1.288               |
| C6-N1 | 1.343     | 1.346            | 1.351               | 1.340               |
| C2=O7 | 1.204     | 1.230            | 1.193               | 1.236               |
| C4-N8 | 1.340     | 1.340            | 1.369               | 1.342               |

<sup>a</sup> *J. Phys. Chem. A* 2009, 113, 12088-12093. <sup>b</sup> *J. Chem. Theory Comput.* 2014, 10, 3915-3924.

<sup>c</sup> *Phys. Chem. Chem. Phys.*, 2017, 19, 5888-5894.

**Table S2:** The vertical excitation energies (in eV) of  $^1n_{\text{N}\pi^*}$ ,  $^1\pi\pi^*$ ,  $^1n_{\text{O}\pi^*}$ , and  $^3\pi\pi^*$  states at Franck-Condon point of 5-AC

|                                     | $^1n_{\text{N}\pi^*}$ | $^1\pi\pi^*$ | $^1n_{\text{O}\pi^*}$ | $T_1(^3\pi\pi^*)$ |
|-------------------------------------|-----------------------|--------------|-----------------------|-------------------|
| SS-CASPT2(14,10)/ANO-L <sup>a</sup> | 4.46                  | 4.74         | 5.58                  | 4.33              |
| MS-CASPT2(14,10)/ANO-L <sup>b</sup> | 4.61                  | 5.06         | -                     | -                 |
| MRCIS(6,5)/def2-SVP <sup>b</sup>    | 5.07                  | 5.31         | -                     | 4.62              |
| TDDFT <sup>c</sup>                  |                       | 4.66, 5.00   | -                     | 4.03              |
| This work                           | 4.86                  | 4.88, 6.18   | 5.10                  | 4.51              |
| Exp. <sup>c</sup>                   |                       | 4.77, 5.51   |                       |                   |
| Exp. <sup>d</sup>                   |                       | 5.17, 6.17   |                       |                   |

<sup>a</sup> *J. Chem. Theory Comput.* 2014, 10, 3915-3924. <sup>b</sup> *Phys. Chem. Chem. Phys.*, 2017, 19, 5888-5894.

<sup>c</sup> *J. Phys. Chem. A* 2009, 113, 12088-12093. <sup>d</sup> *J. Phys. Chem. A* 2017, 121, 2780-2789.

**Table S3:** The computed adiabatic excitation energies (in eV) of the minima and intersection structures of 5-AC

|                                         | SS-CASPT2(14,10)/ANO-L <sup>a</sup> | MS-CASPT2(14,10)/ANO-L <sup>b</sup> | MRCIS(6,5)/def2-SVP <sup>b</sup> | This work                                           |           |
|-----------------------------------------|-------------------------------------|-------------------------------------|----------------------------------|-----------------------------------------------------|-----------|
| $S_0$ min                               | 0.00                                | 0.00                                | 0.00                             | S0-MIN                                              | 0.00      |
| $^1n_{\text{N}\pi^*}$ min               | 3.59                                | -                                   | 4.10                             | S1-MIN                                              | 3.97      |
| $^1\pi\pi^*$ min                        | 3.69                                | -                                   | 4.28                             | S2-MIN                                              | 4.12      |
| $^3\pi\pi^*$ min                        | 3.27                                | -                                   | 3.54                             | T1-MIN                                              | 3.63      |
| $^1\pi\pi^*/^1n_{\text{N}\pi^*}$ CoIn   | 4.04/ 3.97                          | -                                   | 4.41/4.41                        | S <sub>2</sub> /S <sub>1</sub>                      | 4.12/4.12 |
| S <sub>1</sub> /S <sub>0</sub> CoIn (a) | 3.87/ 3.75                          | 4.83/4.82                           | 5.31/5.31                        | S <sub>1</sub> /S <sub>0</sub> -I                   | 4.30/3.95 |
| S <sub>1</sub> /S <sub>0</sub> CoIn (b) | 3.47/ 3.47/3.89(T1)                 | 3.77/3.76                           | 4.06/4.06                        | S <sub>1</sub> /T <sub>1</sub> /S <sub>0</sub> -II  | 4.21/4.08 |
| S <sub>1</sub> /S <sub>0</sub> CoIn (γ) | -                                   | 3.85/3.84                           | 3.99/3.99                        | S <sub>1</sub> /T <sub>1</sub> /S <sub>0</sub> -III | 3.75/3.75 |
| $^1\pi\pi^*/^3\pi\pi^*$ STC             | 3.87/ 3.89/ 3.77(T1)                | -                                   | -                                | -                                                   | -         |
| $^1n_{\text{N}\pi^*}/^3\pi\pi^*$ STC    | -                                   | -                                   | 4.12/4.12                        | S <sub>1</sub> /T <sub>1</sub>                      | 3.95/3.89 |
| $^3\pi\pi^*/^3\pi\pi^*$                 | -                                   | -                                   | -                                | T <sub>2</sub> /T <sub>1</sub>                      | 3.96/3.95 |

<sup>a</sup> *J. Chem. Theory Comput.* 2014, 10, 3915-3924. <sup>b</sup> *Phys. Chem. Chem. Phys.*, 2017, 19, 5888-5894.

## 6. QM(CASPT2)/MM Computed Relaxation Pathways II' and III'

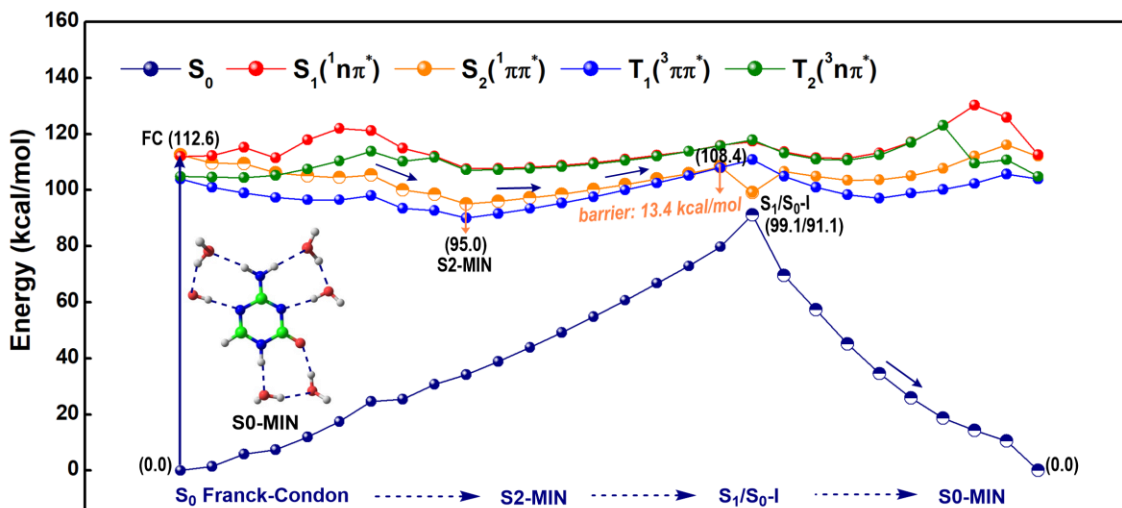

**Figure S5.** Relaxation pathway II' of 5-AC in aqueous solution computed at the QM(CASPT2)/MM level. Relative energies of minima and intersection structures are in kcal/mol.

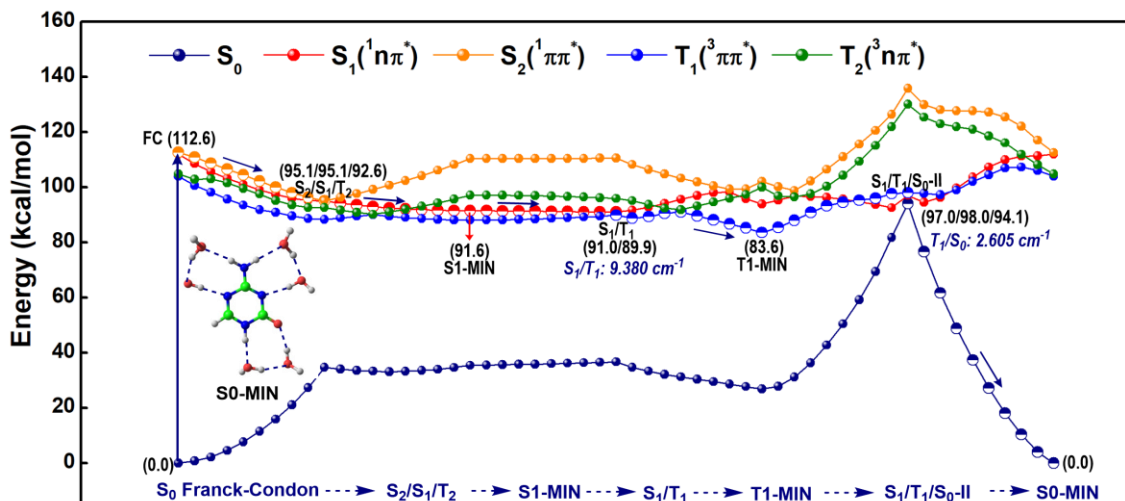

**Figure S6.** Relaxation pathway III' of 5-AC in aqueous solution computed at the QM(CASPT2)/MM level. Spin-orbital couplings at  $S_1/T_1$  and  $S_1/T_1/S_0-II$  are given in  $\text{cm}^{-1}$ . Relative energies of minima and intersection structures are in kcal/mol.

## 7. Cartesian coordinates of All Computed Structures

In xyz format (unit: Ångstrom)

### CASSCF/ANO-L-VDZP

#### S0-MIN

|   |              |              |              |
|---|--------------|--------------|--------------|
| C | -0.357476028 | -0.325875023 | 0.229680018  |
| N | 0.341885027  | -0.973917071 | 1.110492078  |
| C | 1.653274120  | -0.646333049 | 1.306678092  |
| C | 1.358668096  | 1.022653073  | -0.350634025 |
| N | 0.124605007  | 0.729787053  | -0.539943037 |
| N | 2.151526155  | 0.392262029  | 0.530966037  |
| H | 3.102758223  | 0.691790052  | 0.672735046  |
| N | -1.649147119 | -0.620508046 | 0.029419001  |
| H | -1.963775141 | -1.512845109 | 0.364878027  |
| H | -2.065503149 | -0.287993023 | -0.820383060 |
| H | 1.807123128  | 1.824952131  | -0.918745067 |
| O | 2.363013171  | -1.219113085 | 2.093251151  |
| O | -2.733839197 | 0.356619025  | -2.728166195 |
| H | -2.629401188 | -0.143525009 | -3.525973252 |
| H | -2.360519169 | 1.219526087  | -2.880668210 |
| O | -1.191319087 | 2.765921198  | -2.329191167 |
| H | -1.566105111 | 3.489871251  | -1.844840131 |
| H | -0.810044059 | 2.169065158  | -1.692877120 |
| O | 4.862872351  | 1.248671090  | 1.181207087  |
| H | 5.136525369  | 2.113660152  | 1.453307107  |
| H | 5.132414370  | 0.636409044  | 1.865785136  |
| O | -2.145668152 | -3.642177264 | 0.683196049  |
| H | -2.886480206 | -4.220391304 | 0.804450057  |
| H | -1.559679111 | -3.776041274 | 1.425256104  |
| O | 5.025804364  | -0.758670055 | 3.159791227  |
| H | 4.140683299  | -1.031827075 | 2.927287212  |
| H | 5.552154399  | -1.544063112 | 3.226183233  |
| O | -0.264665017 | -3.327435241 | 2.832781203  |
| H | -0.002365999 | -2.522987184 | 2.391665171  |
| H | 0.533658036  | -3.727547270 | 3.149010225  |

#### S1-MIN

|   |              |              |              |
|---|--------------|--------------|--------------|
| C | -0.528514036 | -0.198852015 | 0.053044002  |
| N | 0.272746019  | -0.910152065 | 0.884654066  |
| C | 1.562816111  | -0.642046047 | 1.248051090  |
| C | 1.456630102  | 0.873824062  | -0.582809040 |
| N | 0.070876006  | 0.748146053  | -0.594151045 |
| N | 2.110098154  | 0.394877027  | 0.566599039  |
| H | 3.079049219  | 0.607218045  | 0.725546052  |

|   |              |              |              |
|---|--------------|--------------|--------------|
| N | -1.853804134 | -0.459780034 | 0.017630000  |
| H | -2.085728150 | -1.385158100 | 0.332370023  |
| H | -2.292495164 | -0.199327015 | -0.848195061 |
| H | 1.847113132  | 1.792133130  | -0.988200073 |
| O | 2.132379151  | -1.281374091 | 2.107923151  |
| O | -2.789862203 | 0.433758029  | -2.797952202 |
| H | -2.500767179 | -0.039636000 | -3.565975258 |
| H | -2.439824174 | 1.317267093  | -2.865880208 |
| O | -1.341935098 | 2.902234209  | -2.304437165 |
| H | -1.692337122 | 3.660765265  | -1.855336134 |
| H | -0.901531063 | 2.370124170  | -1.651441118 |
| O | 4.913998355  | 1.132336081  | 1.249375092  |
| H | 5.124980367  | 2.000144144  | 1.565857113  |
| H | 5.128620371  | 0.515414037  | 1.946282139  |
| O | -1.803395127 | -3.468521251 | 0.881142065  |
| H | -2.442738174 | -4.155033300 | 1.014047074  |
| H | -1.175779083 | -3.528008256 | 1.597332115  |
| O | 4.875443353  | -0.958641068 | 3.189077229  |
| H | 3.977989288  | -1.155925083 | 2.933095212  |
| H | 5.358459386  | -1.774142130 | 3.157625225  |
| O | 0.244686019  | -3.374689245 | 3.029956218  |
| H | 0.891092063  | -2.702802195 | 2.833502202  |
| H | 0.717654050  | -4.099522294 | 3.415423246  |

S2-MIN

|   |              |              |              |
|---|--------------|--------------|--------------|
| C | -0.373591026 | -0.216509014 | 0.096070008  |
| N | 0.391908030  | -1.007749071 | 0.993653070  |
| C | 1.592742116  | -0.571826041 | 1.213374089  |
| C | 1.499077108  | 0.898384062  | -0.590315044 |
| N | 0.118952008  | 0.714147050  | -0.641966046 |
| N | 2.155088153  | 0.470830033  | 0.562369040  |
| H | 3.111154223  | 0.715774053  | 0.752050053  |
| N | -1.697154121 | -0.504147038 | 0.118751010  |
| H | -1.929674139 | -1.434006103 | 0.412078029  |
| H | -2.207295161 | -0.190024015 | -0.686825052 |
| H | 1.899777138  | 1.775449129  | -1.067684078 |
| O | 2.324976169  | -1.146852085 | 2.127243153  |
| O | -2.842168205 | 0.383047026  | -2.740070196 |
| H | -2.509548182 | -0.156216013 | -3.444381249 |
| H | -2.414772172 | 1.231371090  | -2.817512201 |
| O | -1.196135087 | 2.720983196  | -2.330915168 |
| H | -1.509102106 | 3.451587251  | -1.814755129 |
| H | -0.772810058 | 2.110702152  | -1.728699123 |
| O | 4.914020353  | 1.165513081  | 1.289280094  |
| H | 5.203465375  | 2.049216147  | 1.471849108  |
| H | 5.220375377  | 0.610337042  | 2.002503142  |
| O | -2.284770166 | -3.608108261 | 0.685903050  |

|   |              |              |             |
|---|--------------|--------------|-------------|
| H | -2.832611205 | -4.362884312 | 0.518890038 |
| H | -1.676933121 | -3.839280279 | 1.382490100 |
| O | 5.237757378  | -0.776232056 | 3.396705247 |
| H | 4.363718317  | -1.136281081 | 3.308363238 |
| H | 5.833102422  | -1.512325108 | 3.468175248 |
| O | -0.184234012 | -3.475678252 | 2.664271191 |
| H | 0.055879006  | -2.686603196 | 2.188077158 |
| H | -0.394389030 | -3.202874230 | 3.547525255 |

S3-MIN

|   |              |              |              |
|---|--------------|--------------|--------------|
| C | -0.430106029 | -0.183603016 | 0.152699011  |
| N | 0.365636026  | -0.882344065 | 1.082527077  |
| C | 1.588114112  | -0.544012040 | 1.079117080  |
| C | 1.305479093  | 1.194079085  | -0.446458034 |
| N | 0.005357999  | 0.789886057  | -0.575690040 |
| N | 2.181490155  | 0.355906028  | 0.280863021  |
| H | 3.103711223  | 0.676832047  | 0.515766035  |
| N | -1.744239128 | -0.560962042 | 0.139462008  |
| H | -1.898169138 | -1.526102111 | 0.364448028  |
| H | -2.231410160 | -0.275115018 | -0.690814048 |
| H | 1.748263124  | 1.743828126  | -1.258459091 |
| O | 2.405961175  | -1.174706086 | 1.949572140  |
| O | -2.841416207 | 0.306176024  | -2.776364199 |
| H | -2.471928178 | -0.213952013 | -3.476461249 |
| H | -2.457176177 | 1.175122083  | -2.847929204 |
| O | -1.310047094 | 2.721723197  | -2.375640171 |
| H | -1.650796120 | 3.471384248  | -1.906265137 |
| H | -0.908209063 | 2.144568157  | -1.729085126 |
| O | 4.852132349  | 1.092770080  | 1.316734095  |
| H | 5.134673370  | 1.972380140  | 1.528787109  |
| H | 5.159531371  | 0.517304036  | 2.012657143  |
| O | -2.107691154 | -3.756463272 | 0.691515049  |
| H | -2.927051209 | -4.220352304 | 0.800354056  |
| H | -1.643838117 | -3.802368276 | 1.522065108  |
| O | 5.377894389  | -0.894416064 | 3.363987244  |
| H | 4.537594324  | -1.258868092 | 3.612018262  |
| H | 5.962977431  | -1.628073117 | 3.218403232  |
| O | -0.320736024 | -3.204300230 | 2.930281212  |
| H | -0.128583007 | -2.419829175 | 2.424460174  |
| H | 0.481005032  | -3.707822268 | 2.965432213  |

T1-MIN

|   |              |              |              |
|---|--------------|--------------|--------------|
| C | -0.423898028 | -0.152036010 | 0.053306003  |
| N | 0.319811022  | -0.996880072 | 0.905004064  |
| C | 1.620508115  | -0.606153044 | 1.180635083  |
| C | 1.489371108  | 0.936257066  | -0.624707046 |
| N | 0.107005006  | 0.759349053  | -0.687253050 |



|   |              |              |              |
|---|--------------|--------------|--------------|
| N | 2.169131157  | 0.388648029  | 0.461328031  |
| H | 3.110036225  | 0.672011047  | 0.668896050  |
| N | -1.759399125 | -0.405889031 | 0.087894007  |
| H | -1.987531141 | -1.344138095 | 0.363768025  |
| H | -2.262516162 | -0.086644006 | -0.720380054 |
| H | 1.870221133  | 1.872892134  | -0.993036070 |
| O | 2.195130159  | -1.198825086 | 2.086624153  |
| O | -2.870002208 | 0.416966028  | -2.755116198 |
| H | -2.577399183 | -0.113193009 | -3.483789253 |
| H | -2.472259178 | 1.276549089  | -2.859336207 |
| O | -1.273743090 | 2.788246202  | -2.379464170 |
| H | -1.571062111 | 3.520601251  | -1.856362135 |
| H | -0.814580060 | 2.190624157  | -1.794270127 |
| O | 4.907009353  | 1.193007083  | 1.250597089  |
| H | 5.165241373  | 2.066870151  | 1.510222110  |
| H | 5.169779370  | 0.597335041  | 1.948988140  |
| O | -1.908706136 | -3.461944250 | 0.868896062  |
| H | -2.353677172 | -4.294625310 | 0.785986058  |
| H | -1.276836094 | -3.549353256 | 1.577374116  |
| O | 5.005178363  | -0.855862061 | 3.243423235  |
| H | 4.115876295  | -1.110795080 | 3.020890216  |
| H | 5.519218396  | -1.651977117 | 3.290351235  |
| O | 0.129721008  | -3.457999249 | 3.051432221  |
| H | 0.705336053  | -2.771724198 | 2.735364196  |
| H | -0.116294008 | -3.217004231 | 3.935135281  |

T2-MIN

|   |              |              |              |
|---|--------------|--------------|--------------|
| C | -0.523438036 | -0.197572014 | 0.062985005  |
| N | 0.271008021  | -0.896583066 | 0.906102065  |
| C | 1.572471114  | -0.637488047 | 1.239901088  |
| C | 1.455305106  | 0.887513063  | -0.590476041 |
| N | 0.075146006  | 0.738650052  | -0.601153044 |
| N | 2.128303153  | 0.368422027  | 0.527469038  |
| H | 3.093328221  | 0.593078042  | 0.693032052  |
| N | -1.848773135 | -0.461649036 | 0.022822002  |
| H | -2.079924150 | -1.386961102 | 0.338974023  |
| H | -2.286014166 | -0.202093014 | -0.843988059 |
| H | 1.830797132  | 1.825770133  | -0.963882071 |
| O | 2.142177154  | -1.268604091 | 2.107309152  |
| O | -2.780555198 | 0.430916030  | -2.795451199 |
| H | -2.482203181 | -0.043150002 | -3.559686256 |
| H | -2.438437174 | 1.317243095  | -2.865619208 |
| O | -1.346122097 | 2.912755211  | -2.305690167 |
| H | -1.696506123 | 3.669207262  | -1.853003134 |
| H | -0.897228064 | 2.382873172  | -1.657166118 |
| O | 4.911818351  | 1.134911084  | 1.249448092  |
| H | 5.120531367  | 2.004170146  | 1.563281115  |

|   |              |              |             |
|---|--------------|--------------|-------------|
| H | 5.127314367  | 0.520483036  | 1.948387138 |
| O | -1.798910128 | -3.467212252 | 0.884225062 |
| H | -2.420342175 | -4.173117303 | 1.001618071 |
| H | -1.166579083 | -3.529341254 | 1.596155114 |
| O | 4.881255349  | -0.954130070 | 3.190952231 |
| H | 3.984267288  | -1.150213080 | 2.932180212 |
| H | 5.365362387  | -1.768672125 | 3.152018227 |
| O | 0.255287017  | -3.371531242 | 3.021043217 |
| H | 0.900819066  | -2.697098193 | 2.828276201 |
| H | 0.722873051  | -4.081597293 | 3.439601249 |

T3-MIN

|   |              |              |              |
|---|--------------|--------------|--------------|
| C | -0.454636035 | -0.157952011 | 0.144729009  |
| N | 0.332282026  | -0.869313064 | 1.074972077  |
| C | 1.559470112  | -0.539083040 | 1.072794078  |
| C | 1.294450092  | 1.204698085  | -0.453532033 |
| N | -0.009846999 | 0.810197060  | -0.584016041 |
| N | 2.157783157  | 0.356674028  | 0.281121021  |
| H | 3.085842220  | 0.661008050  | 0.514390036  |
| N | -1.770422130 | -0.525993036 | 0.130751009  |
| H | -1.931430140 | -1.489739109 | 0.357689027  |
| H | -2.257933164 | -0.236853016 | -0.698089050 |
| H | 1.745291127  | 1.736187124  | -1.273517094 |
| O | 2.379610170  | -1.164667086 | 1.941557142  |
| O | -2.875984208 | 0.335169027  | -2.772926198 |
| H | -2.522050180 | -0.186562016 | -3.479499250 |
| H | -2.486310179 | 1.201320088  | -2.849537204 |
| O | -1.331390098 | 2.739194196  | -2.386323169 |
| H | -1.659603122 | 3.494852254  | -1.918021137 |
| H | -0.921707068 | 2.165551156  | -1.741673126 |
| O | 4.852755349  | 0.990360069  | 1.346851097  |
| H | 5.152544374  | 1.840758132  | 1.638082118  |
| H | 5.149166371  | 0.348221025  | 1.987382146  |
| O | -2.093028150 | -3.704464267 | 0.703671050  |
| H | -2.681839193 | -4.444099320 | 0.638767047  |
| H | -1.577864113 | -3.814927277 | 1.497156110  |
| O | 5.330934385  | -1.182628087 | 3.229086231  |
| H | 4.479213320  | -1.585174114 | 3.347699242  |
| H | 5.946946429  | -1.888258135 | 3.076711219  |
| O | -0.309437021 | -3.125441226 | 2.947267214  |
| H | -0.143688012 | -2.361534168 | 2.402259173  |
| H | -0.701224049 | -2.804408201 | 3.748733268  |

S<sub>2</sub>/S<sub>1</sub>/T<sub>2</sub>

|   |              |              |             |
|---|--------------|--------------|-------------|
| C | -0.451273034 | -0.206392013 | 0.003103000 |
| N | 0.335008024  | -1.025556076 | 0.800971056 |
| C | 1.561200115  | -0.634017047 | 1.249789088 |

|   |              |              |              |
|---|--------------|--------------|--------------|
| C | 1.504268109  | 0.801837060  | -0.576528040 |
| N | 0.103719005  | 0.776500058  | -0.629494047 |
| N | 2.086553148  | 0.474402033  | 0.654833049  |
| H | 3.051260222  | 0.693035047  | 0.829636058  |
| N | -1.761930126 | -0.481940035 | -0.002097002 |
| H | -2.016053144 | -1.396358100 | 0.328027023  |
| H | -2.290486164 | -0.124101008 | -0.777553057 |
| H | 1.994073142  | 1.580866114  | -1.135219081 |
| O | 2.132567152  | -1.260817089 | 2.127673152  |
| O | -2.838203206 | 0.497246038  | -2.731611197 |
| H | -2.537536182 | -0.004727003 | -3.476592252 |
| H | -2.441886177 | 1.360718096  | -2.801908204 |
| O | -1.257381088 | 2.873063207  | -2.287704162 |
| H | -1.536893109 | 3.643065260  | -1.810262128 |
| H | -0.797474057 | 2.310325167  | -1.670300122 |
| O | 4.915076353  | 1.160494084  | 1.263647092  |
| H | 5.156067371  | 2.031405147  | 1.548772112  |
| H | 5.158310374  | 0.554636041  | 1.960138143  |
| O | -1.928169138 | -3.446720249 | 0.836115061  |
| H | -2.584562185 | -4.117765299 | 0.966918067  |
| H | -1.286629091 | -3.539599254 | 1.536491109  |
| O | 4.935176357  | -0.916059064 | 3.232391234  |
| H | 4.031943290  | -1.122353083 | 3.011176215  |
| H | 5.419615390  | -1.731207127 | 3.208732232  |
| O | 0.132418007  | -3.422491244 | 2.982061216  |
| H | 0.753433053  | -2.739870199 | 2.750735197  |
| H | 0.630725045  | -4.109244296 | 3.403984244  |

S<sub>1</sub>/T<sub>1</sub>

|   |              |              |              |
|---|--------------|--------------|--------------|
| C | -0.533673038 | -0.207645014 | 0.062313002  |
| N | 0.262369017  | -0.902803063 | 0.904136065  |
| C | 1.554121109  | -0.633366047 | 1.254824088  |
| C | 1.454543107  | 0.858796063  | -0.585176040 |
| N | 0.063997003  | 0.754815052  | -0.570179040 |
| N | 2.098345148  | 0.418020028  | 0.582824043  |
| H | 3.074295223  | 0.610300042  | 0.724124052  |
| N | -1.857491134 | -0.469087034 | 0.015601003  |
| H | -2.093587152 | -1.389462100 | 0.341863023  |
| H | -2.289872165 | -0.216321018 | -0.855486060 |
| H | 1.854996132  | 1.752325125  | -1.033960072 |
| O | 2.134961155  | -1.274335091 | 2.105551151  |
| O | -2.764036200 | 0.430891031  | -2.804599202 |
| H | -2.478059178 | -0.035569003 | -3.578125258 |
| H | -2.418954175 | 1.316614094  | -2.868257209 |
| O | -1.347239095 | 2.921258211  | -2.297742168 |
| H | -1.714106124 | 3.688796266  | -1.877729137 |
| H | -0.913591066 | 2.413792173  | -1.621395117 |

|   |              |              |             |
|---|--------------|--------------|-------------|
| O | 4.918200356  | 1.125437081  | 1.243343090 |
| H | 5.121926368  | 1.993323145  | 1.564308110 |
| H | 5.130001370  | 0.507962036  | 1.940628140 |
| O | -1.808420131 | -3.475823251 | 0.887045064 |
| H | -2.432870177 | -4.176843303 | 1.015764075 |
| H | -1.174654084 | -3.531735252 | 1.598187117 |
| O | 4.875291352  | -0.963333071 | 3.186660228 |
| H | 3.977214287  | -1.156588084 | 2.929736212 |
| H | 5.355607385  | -1.780278130 | 3.151695228 |
| O | 0.250223018  | -3.376738241 | 3.022790216 |
| H | 0.891209064  | -2.700111196 | 2.824264201 |
| H | 0.725182052  | -4.087664295 | 3.431151246 |

$T_2/T_1$

|   |              |              |              |
|---|--------------|--------------|--------------|
| C | -0.481122033 | -0.200337013 | 0.087795009  |
| N | 0.310631025  | -0.959914067 | 0.918946064  |
| C | 1.616299119  | -0.629660044 | 1.222086088  |
| C | 1.469722106  | 0.906628067  | -0.578271044 |
| N | 0.078042008  | 0.772841057  | -0.567760038 |
| N | 2.142450157  | 0.423339032  | 0.547989040  |
| H | 3.110320224  | 0.647317049  | 0.697115052  |
| N | -1.816529132 | -0.470197031 | 0.069111004  |
| H | -2.057527146 | -1.408435099 | 0.350851025  |
| H | -2.285070167 | -0.180279015 | -0.771549055 |
| H | 1.856139134  | 1.815258133  | -1.007523070 |
| O | 2.208162160  | -1.270138091 | 2.077192150  |
| O | -2.810984202 | 0.463666032  | -2.743277195 |
| H | -2.526741183 | -0.006348000 | -3.515281252 |
| H | -2.452660178 | 1.342722096  | -2.803558199 |
| O | -1.348297095 | 2.915883209  | -2.241722163 |
| H | -1.701981123 | 3.660939264  | -1.773874128 |
| H | -0.888927061 | 2.376021173  | -1.606024116 |
| O | 4.943400354  | 1.141648082  | 1.244711087  |
| H | 5.169183373  | 2.005572143  | 1.561671114  |
| H | 5.179072373  | 0.516277035  | 1.926856138  |
| O | -1.872232134 | -3.532496256 | 0.805691057  |
| H | -2.402457175 | -4.318351311 | 0.802108056  |
| H | -1.235569090 | -3.610496258 | 1.502823106  |
| O | 4.969427360  | -0.975730069 | 3.162556226  |
| H | 4.072799293  | -1.187898083 | 2.919762211  |
| H | 5.462683396  | -1.785603130 | 3.139610227  |
| O | 0.195038012  | -3.421536249 | 2.917383210  |
| H | 0.786087057  | -2.721068198 | 2.698070197  |
| H | 0.383311027  | -3.865308280 | 3.735569269  |

$S_1/S_0-I$

|   |              |              |              |
|---|--------------|--------------|--------------|
| C | -0.412763027 | -0.198008014 | 0.034189004  |
| N | 0.405097027  | -1.056480078 | 0.906308063  |
| C | 1.516807107  | -0.526772038 | 1.149285083  |
| C | 1.516957108  | 0.748820056  | -0.716934052 |
| N | 0.067351003  | 0.727846052  | -0.674833049 |
| N | 2.103976150  | 0.508137035  | 0.540272037  |
| H | 3.030796218  | 0.799438056  | 0.788131057  |
| N | -1.749006126 | -0.432124030 | 0.219997017  |
| H | -1.954863140 | -1.392721101 | 0.418584030  |
| H | -2.303200166 | -0.089682007 | -0.543891038 |
| H | 1.940422142  | 1.581051114  | -1.255276090 |
| O | 2.351911170  | -1.075651080 | 2.137841155  |
| O | -2.870726207 | 0.425988029  | -2.766074199 |
| H | -2.402418175 | -0.142367011 | -3.361889241 |
| H | -2.421135174 | 1.266280093  | -2.786699200 |
| O | -1.206202086 | 2.744934198  | -2.293296164 |
| H | -1.517070108 | 3.476532248  | -1.777719130 |
| H | -0.783142058 | 2.131773154  | -1.688415119 |
| O | 4.861567352  | 1.111179082  | 1.378857102  |
| H | 5.230761375  | 1.974148142  | 1.508285110  |
| H | 5.176342374  | 0.552358038  | 2.083569149  |
| O | -2.275856164 | -3.683598263 | 0.681468048  |
| H | -2.807469200 | -4.447300318 | 0.502444035  |
| H | -1.641552119 | -3.922996283 | 1.349164099  |
| O | 5.450944392  | -0.887440063 | 3.423129247  |
| H | 4.684658339  | -1.309065095 | 3.791900272  |
| H | 6.107292438  | -1.564321112 | 3.317193237  |
| O | -0.178674015 | -3.374133244 | 2.689807195  |
| H | -0.030319004 | -2.629336189 | 2.113399151  |
| H | -0.616389046 | -3.033691220 | 3.458318248  |

S<sub>1</sub>/T<sub>1</sub>/S<sub>0</sub>-II

|   |              |              |              |
|---|--------------|--------------|--------------|
| C | -0.542679037 | -0.313289024 | 0.155888013  |
| N | 0.271979019  | -1.056551078 | 0.892797062  |
| C | 1.549357112  | -0.594863042 | 1.246452091  |
| C | 1.348649098  | 0.646652048  | -0.561765042 |
| N | -0.026274000 | 0.894693067  | -0.165181011 |
| N | 2.014081144  | 0.581812044  | 0.660302048  |
| H | 2.994884218  | 0.779150056  | 0.760245056  |
| N | -1.852298133 | -0.619415046 | 0.041062001  |
| H | -2.072390147 | -1.562821112 | 0.309467020  |
| H | -2.284787163 | -0.304507020 | -0.807365057 |
| H | 1.746071124  | 0.978772071  | -1.500164107 |
| O | 2.190152157  | -1.222662086 | 2.055813146  |
| O | -2.498641178 | 0.572666041  | -2.731083195 |
| H | -2.336800169 | 0.206473014  | -3.590335261 |
| H | -2.159778155 | 1.463796104  | -2.729688199 |

|   |              |              |              |
|---|--------------|--------------|--------------|
| O | -1.232392090 | 3.126873227  | -2.046259147 |
| H | -1.667943119 | 3.960723288  | -1.927594139 |
| H | -0.925171067 | 2.850878203  | -1.191430088 |
| O | 4.906577354  | 1.166705085  | 1.221135087  |
| H | 5.139989368  | 2.029385145  | 1.536289112  |
| H | 5.143999373  | 0.543479037  | 1.904202139  |
| O | -1.927764137 | -3.653831265 | 0.783632055  |
| H | -2.535338181 | -4.361271316 | 0.955511069  |
| H | -1.281447091 | -3.668203264 | 1.486016109  |
| O | 4.965363358  | -0.932913068 | 3.176402228  |
| H | 4.063382293  | -1.131146083 | 2.943686214  |
| H | 5.446320394  | -1.749595126 | 3.140434225  |
| O | 0.117196007  | -3.450725248 | 2.952999215  |
| H | 0.611185043  | -2.708221192 | 2.620999187  |
| H | 0.741587055  | -4.028244288 | 3.372324241  |

S<sub>1</sub>/T<sub>1</sub>/S<sub>0</sub>-III

|   |              |              |              |
|---|--------------|--------------|--------------|
| C | -0.279066020 | -0.221724018 | -0.067443005 |
| N | 0.576741039  | -1.195788084 | 0.576110043  |
| C | 1.644928116  | -0.617284044 | 1.285418095  |
| C | 1.700646120  | 0.491885033  | -0.685399051 |
| N | 0.267707018  | 0.679219050  | -0.769785053 |
| N | 2.169191155  | 0.458764035  | 0.655589047  |
| H | 3.109632225  | 0.735103051  | 0.871959062  |
| N | -1.589551114 | -0.390287028 | 0.223329018  |
| H | -1.856962132 | -1.348902098 | 0.364873026  |
| H | -2.202189156 | 0.101146008  | -0.402471027 |
| H | 2.300010164  | 1.050128078  | -1.382207101 |
| O | 2.008146145  | -1.141668085 | 2.318607167  |
| O | -2.846417207 | 0.488158038  | -2.638677189 |
| H | -2.552359183 | -0.057574003 | -3.355138241 |
| H | -2.399043172 | 1.324826094  | -2.729082196 |
| O | -1.127765080 | 2.778486199  | -2.297183166 |
| H | -1.301762094 | 3.556863255  | -1.785377129 |
| H | -0.611774044 | 2.187477155  | -1.750850129 |
| O | 4.959872355  | 1.192614085  | 1.331232097  |
| H | 5.193482372  | 2.082156151  | 1.559083115  |
| H | 5.180235372  | 0.639821047  | 2.077220149  |
| O | -1.929670138 | -3.406028244 | 0.871079061  |
| H | -2.349978170 | -4.240188307 | 0.711322053  |
| H | -1.295928095 | -3.534091255 | 1.571384115  |
| O | 4.888650352  | -0.722688050 | 3.459663247  |
| H | 3.972543287  | -0.927002068 | 3.306458237  |
| H | 5.342839386  | -1.548621111 | 3.567457256  |
| O | 0.039307000  | -3.393977243 | 3.092942223  |
| H | 0.728402053  | -2.769150200 | 2.896238208  |
| H | -0.258807019 | -3.203881233 | 3.973354288  |

$S_3/S_2$ 

|   |              |              |              |
|---|--------------|--------------|--------------|
| C | -0.453532033 | -0.154929012 | 0.149492012  |
| N | 0.339901025  | -0.870863062 | 1.064731079  |
| C | 1.563862114  | -0.540722039 | 1.063107076  |
| C | 1.296375091  | 1.196285088  | -0.472297034 |
| N | -0.007883000 | 0.807277060  | -0.588647040 |
| N | 2.164351157  | 0.365463027  | 0.278754022  |
| H | 3.082863222  | 0.685919047  | 0.525880036  |
| N | -1.776934127 | -0.509800038 | 0.149955010  |
| H | -1.939645140 | -1.476204104 | 0.364352025  |
| H | -2.263145163 | -0.217870015 | -0.678847049 |
| H | 1.744251124  | 1.714164122  | -1.302424095 |
| O | 2.374075171  | -1.189122086 | 1.927093140  |
| O | -2.877022205 | 0.341478026  | -2.775209201 |
| H | -2.509197179 | -0.185885013 | -3.470803249 |
| H | -2.483826178 | 1.206212088  | -2.849347203 |
| O | -1.322268093 | 2.740156198  | -2.387010174 |
| H | -1.646955119 | 3.497289252  | -1.918319138 |
| H | -0.915653068 | 2.163942156  | -1.742521127 |
| O | 4.848234350  | 0.979889069  | 1.367069097  |
| H | 5.159503372  | 1.828059132  | 1.653637119  |
| H | 5.144977372  | 0.335248022  | 2.004852144  |
| O | -2.101983152 | -3.705726265 | 0.703559049  |
| H | -2.692433194 | -4.443897322 | 0.635284045  |
| H | -1.585209114 | -3.822545276 | 1.494898105  |
| O | 5.341027382  | -1.208635085 | 3.226109233  |
| H | 4.500636326  | -1.615186116 | 3.399631242  |
| H | 5.955079428  | -1.912484139 | 3.054979222  |
| O | -0.318213023 | -3.118109226 | 2.948320213  |
| H | -0.156303010 | -2.360325173 | 2.393929171  |
| H | -0.725879052 | -2.790840202 | 3.739528272  |

 $S_3/T_1$ 

|   |              |              |              |
|---|--------------|--------------|--------------|
| C | -0.430164032 | -0.196040014 | 0.077325004  |
| N | 0.326140024  | -0.941340068 | 1.007654073  |
| C | 1.571964114  | -0.399142026 | 1.105214080  |
| C | 1.321830093  | 1.235544086  | -0.529380040 |
| N | -0.043483003 | 0.870551064  | -0.571170041 |
| N | 2.100636153  | 0.492613038  | 0.394829031  |
| H | 3.071342224  | 0.719761054  | 0.520771036  |
| N | -1.688829121 | -0.578837041 | -0.012463003 |
| H | -1.933234137 | -1.469490104 | 0.369085028  |
| H | -2.191089155 | -0.282529019 | -0.826805060 |
| H | 1.777014128  | 1.197064084  | -1.510877110 |
| O | 2.368290169  | -1.007729074 | 2.110249149  |
| O | -2.910480209 | 0.300721022  | -2.801117200 |

|   |              |              |              |
|---|--------------|--------------|--------------|
| H | -2.565926187 | -0.202793015 | -3.525691254 |
| H | -2.518721179 | 1.168283086  | -2.859337207 |
| O | -1.368896097 | 2.699224195  | -2.436533174 |
| H | -1.660900119 | 3.490208252  | -2.003688145 |
| H | -0.933113065 | 2.163877157  | -1.773440128 |
| O | 4.800293347  | 0.828271061  | 1.474959109  |
| H | 5.150951370  | 1.665096119  | 1.749766125  |
| H | 5.137626369  | 0.165070011  | 2.072490151  |
| O | -2.149127156 | -3.703612266 | 0.692306047  |
| H | -2.748668199 | -4.437117318 | 0.665818049  |
| H | -1.589980113 | -3.815844272 | 1.455418106  |
| O | 5.431369390  | -1.390438098 | 3.256726233  |
| H | 4.624096331  | -1.808748131 | 3.530087256  |
| H | 6.044473436  | -2.085931148 | 3.051262217  |
| O | -0.274144020 | -3.089965220 | 2.857397206  |
| H | -0.135390010 | -2.353582168 | 2.261836163  |
| H | -0.697370052 | -2.739822197 | 3.629820260  |

$T_3/T_1$

|   |              |              |              |
|---|--------------|--------------|--------------|
| C | -0.492690033 | -0.135399011 | 0.131961010  |
| N | 0.311670022  | -0.877669064 | 1.013923072  |
| C | 1.514768108  | -0.576267039 | 0.965913069  |
| C | 1.267940090  | 1.161266085  | -0.514417035 |
| N | -0.039434003 | 0.841929063  | -0.592081041 |
| N | 2.178979156  | 0.260960019  | 0.136045009  |
| H | 3.016497219  | 0.677816047  | 0.503149036  |
| N | -1.828654133 | -0.455870034 | 0.163665014  |
| H | -1.994734143 | -1.425815100 | 0.360957025  |
| H | -2.315097166 | -0.160073012 | -0.663685046 |
| H | 1.702393124  | 1.780512127  | -1.278818090 |
| O | 2.404168174  | -1.189241088 | 1.816293130  |
| O | -2.876669206 | 0.366489028  | -2.793546203 |
| H | -2.438184175 | -0.160247010 | -3.447495250 |
| H | -2.502414180 | 1.240560089  | -2.852054204 |
| O | -1.369485098 | 2.808267200  | -2.351840170 |
| H | -1.725711124 | 3.544274255  | -1.872426136 |
| H | -0.962264069 | 2.227367161  | -1.711981123 |
| O | 4.800363346  | 0.824315059  | 1.468416107  |
| H | 5.055290364  | 1.662047122  | 1.831689134  |
| H | 5.131086368  | 0.150162009  | 2.057547149  |
| O | -2.036092144 | -3.731330268 | 0.737565054  |
| H | -2.610279189 | -4.481814322 | 0.661633050  |
| H | -1.454601104 | -3.891113280 | 1.473188106  |
| O | 5.359287384  | -1.466089103 | 3.157020227  |
| H | 4.522893325  | -1.848461132 | 3.393620244  |
| H | 5.921440425  | -2.182766155 | 2.887996208  |
| O | -0.111803008 | -3.053279219 | 2.934099210  |



|   |              |              |             |
|---|--------------|--------------|-------------|
| H | -0.164711012 | -2.311775166 | 2.336617169 |
| H | -0.561318041 | -2.792926203 | 3.727816267 |

### Relaxation pathway I

LIIC path connecting Franck-Condon point and  $S_2/S_1/T_2$

Coord\_1

|   |              |              |              |
|---|--------------|--------------|--------------|
| C | -0.357476028 | -0.325875023 | 0.229680018  |
| N | 0.341885027  | -0.973917071 | 1.110492078  |
| C | 1.653274120  | -0.646333049 | 1.306678092  |
| C | 1.358668096  | 1.022653073  | -0.350634025 |
| N | 0.124605007  | 0.729787053  | -0.539943037 |
| N | 2.151526155  | 0.392262029  | 0.530966037  |
| H | 3.102758223  | 0.691790052  | 0.672735046  |
| N | -1.649147119 | -0.620508046 | 0.029419001  |
| H | -1.963775141 | -1.512845109 | 0.364878027  |
| H | -2.065503149 | -0.287993023 | -0.820383060 |
| H | 1.807123128  | 1.824952131  | -0.918745067 |
| O | 2.363013171  | -1.219113085 | 2.093251151  |
| O | -2.733839197 | 0.356619025  | -2.728166195 |
| H | -2.629401188 | -0.143525009 | -3.525973252 |
| H | -2.360519169 | 1.219526087  | -2.880668210 |
| O | -1.191319087 | 2.765921198  | -2.329191167 |
| H | -1.566105111 | 3.489871251  | -1.844840131 |
| H | -0.810044059 | 2.169065158  | -1.692877120 |
| O | 4.862872351  | 1.248671090  | 1.181207087  |
| H | 5.136525369  | 2.113660152  | 1.453307107  |
| H | 5.132414370  | 0.636409044  | 1.865785136  |
| O | -2.145668152 | -3.642177264 | 0.683196049  |
| H | -2.886480206 | -4.220391304 | 0.804450057  |
| H | -1.559679111 | -3.776041274 | 1.425256104  |
| O | 5.025804364  | -0.758670055 | 3.159791227  |
| H | 4.140683299  | -1.031827075 | 2.927287212  |
| H | 5.552154399  | -1.544063112 | 3.226183233  |
| O | -0.264665017 | -3.327435241 | 2.832781203  |
| H | -0.002365999 | -2.522987184 | 2.391665171  |
| H | 0.533658036  | -3.727547270 | 3.149010225  |

Coord\_2

|   |              |              |              |
|---|--------------|--------------|--------------|
| C | -0.367468027 | -0.318725023 | 0.203398012  |
| N | 0.342428026  | -0.983659071 | 1.077050076  |
| C | 1.645885117  | -0.644421047 | 1.299170094  |
| C | 1.373184100  | 1.007115075  | -0.380227030 |
| N | 0.118268009  | 0.731450051  | -0.551278040 |
| N | 2.149752157  | 0.403012026  | 0.543985041  |
| H | 3.103131224  | 0.691542048  | 0.691423052  |
| N | -1.661793122 | -0.614063042 | 0.022678002  |
| H | -1.968213139 | -1.509167111 | 0.358436024  |

|   |              |              |              |
|---|--------------|--------------|--------------|
| H | -2.090763150 | -0.280506022 | -0.820693058 |
| H | 1.817550132  | 1.809403131  | -0.950716067 |
| O | 2.343894171  | -1.219809086 | 2.097031148  |
| O | -2.750549197 | 0.360874028  | -2.733004198 |
| H | -2.620789188 | -0.139364009 | -3.526904255 |
| H | -2.377094170 | 1.225430086  | -2.876265206 |
| O | -1.209606088 | 2.770026200  | -2.326991165 |
| H | -1.577448116 | 3.497763252  | -1.842944131 |
| H | -0.819960057 | 2.177300156  | -1.691718122 |
| O | 4.874454352  | 1.241224090  | 1.191836088  |
| H | 5.143553372  | 2.107498153  | 1.464516108  |
| H | 5.141549372  | 0.630519047  | 1.878381136  |
| O | -2.113412153 | -3.632328259 | 0.700916052  |
| H | -2.843952204 | -4.223411303 | 0.822641060  |
| H | -1.521841112 | -3.759403270 | 1.439642105  |
| O | 5.022761362  | -0.771654054 | 3.172112230  |
| H | 4.135657300  | -1.038289076 | 2.940743210  |
| H | 5.545177398  | -1.560446111 | 3.229925231  |
| O | -0.220476017 | -3.337566239 | 2.849152206  |
| H | 0.081686007  | -2.546657182 | 2.431354174  |
| H | 0.544505037  | -3.769535273 | 3.177120231  |

Coord\_3

|   |              |              |              |
|---|--------------|--------------|--------------|
| C | -0.377294028 | -0.311339021 | 0.177293011  |
| N | 0.343430023  | -0.993124073 | 1.043369077  |
| C | 1.638426120  | -0.642561047 | 1.291784092  |
| C | 1.387779099  | 0.989598069  | -0.409009028 |
| N | 0.112510010  | 0.733068052  | -0.562421042 |
| N | 2.146672155  | 0.413700031  | 0.557036039  |
| H | 3.101849223  | 0.692198048  | 0.709649049  |
| N | -1.673956118 | -0.607638042 | 0.016482003  |
| H | -1.971901139 | -1.505593111 | 0.352385025  |
| H | -2.115670152 | -0.273049020 | -0.820128061 |
| H | 1.829645134  | 1.791414131  | -0.981254071 |
| O | 2.324231167  | -1.220891089 | 2.100762150  |
| O | -2.766123201 | 0.364844027  | -2.737226196 |
| H | -2.611425191 | -0.135300007 | -3.526608254 |
| H | -2.392525174 | 1.230918088  | -2.871254204 |
| O | -1.226999091 | 2.774044201  | -2.324598167 |
| H | -1.587659115 | 3.505689253  | -1.841004130 |
| H | -0.828627060 | 2.185689155  | -1.690489123 |
| O | 4.884310353  | 1.234536088  | 1.201996085  |
| H | 5.148801371  | 2.101986152  | 1.475574108  |
| H | 5.149054370  | 0.625177045  | 1.890262134  |
| O | -2.080719149 | -3.621743259 | 0.718489050  |
| H | -2.800739203 | -4.225511306 | 0.840824061  |
| H | -1.483452107 | -3.742080271 | 1.453659105  |

|   |              |              |             |
|---|--------------|--------------|-------------|
| O | 5.018397359  | -0.784648054 | 3.183015229 |
| H | 4.129375299  | -1.044796077 | 2.952774214 |
| H | 5.536968398  | -1.576680116 | 3.231781230 |
| O | -0.176288013 | -3.347696242 | 2.865522204 |
| H | 0.165737013  | -2.570326185 | 2.471042177 |
| H | 0.555352039  | -3.811522275 | 3.205228232 |

Coord\_4

|   |              |              |              |
|---|--------------|--------------|--------------|
| C | -0.386954026 | -0.303783021 | 0.151326013  |
| N | 0.344880027  | -1.002410070 | 1.009379075  |
| C | 1.630863119  | -0.640894044 | 1.284493093  |
| C | 1.402475103  | 0.969880068  | -0.436982031 |
| N | 0.107371006  | 0.734555051  | -0.573406042 |
| N | 2.142243153  | 0.424194029  | 0.570077041  |
| H | 3.098904225  | 0.693644051  | 0.727364051  |
| N | -1.685645120 | -0.601228044 | 0.010842000  |
| H | -1.974882143 | -1.502107108 | 0.346716023  |
| H | -2.140240154 | -0.265579017 | -0.818643057 |
| H | 1.843446135  | 1.770806128  | -1.010317073 |
| O | 2.303963165  | -1.222572089 | 2.104373149  |
| O | -2.780587202 | 0.368625025  | -2.740708199 |
| H | -2.601430186 | -0.131262009 | -3.524995253 |
| H | -2.406800175 | 1.236066088  | -2.865535206 |
| O | -1.243383091 | 2.777992202  | -2.321967167 |
| H | -1.596531115 | 3.513696256  | -1.838968131 |
| H | -0.835909063 | 2.194237157  | -1.689190120 |
| O | 4.892375353  | 1.228696088  | 1.211633085  |
| H | 5.152118370  | 2.097252149  | 1.486386109  |
| H | 5.154904372  | 0.620533044  | 1.901418138  |
| O | -2.047693149 | -3.610441260 | 0.735839052  |
| H | -2.756971197 | -4.226682306 | 0.858926061  |
| H | -1.444594103 | -3.724131267 | 1.467203106  |
| O | 5.012797362  | -0.797443057 | 3.192560232  |
| H | 4.121949297  | -1.051240075 | 2.963451211  |
| H | 5.527686396  | -1.592496112 | 3.231869232  |
| O | -0.132099009 | -3.357827240 | 2.881892207  |
| H | 0.249789019  | -2.593994187 | 2.510731179  |
| H | 0.566199040  | -3.853508278 | 3.233337234  |

Coord\_5

|   |              |              |              |
|---|--------------|--------------|--------------|
| C | -0.396448027 | -0.296129023 | 0.125449008  |
| N | 0.346759024  | -1.011632073 | 0.974999069  |
| C | 1.623152118  | -0.639576048 | 1.277273094  |
| C | 1.417290102  | 0.947710071  | -0.464128035 |
| N | 0.102904009  | 0.735814054  | -0.584265040 |
| N | 2.136398152  | 0.434355031  | 0.583070041  |
| H | 3.094257223  | 0.695769052  | 0.744525052  |

|   |              |              |              |
|---|--------------|--------------|--------------|
| N | -1.696864122 | -0.594824042 | 0.005775001  |
| H | -1.977205141 | -1.498686110 | 0.341427024  |
| H | -2.164495157 | -0.258037019 | -0.816176059 |
| H | 1.859007132  | 1.747367126  | -1.037814076 |
| O | 2.283020166  | -1.225076087 | 2.107794153  |
| O | -2.793946203 | 0.372314026  | -2.743331198 |
| H | -2.590898188 | -0.127173009 | -3.521990252 |
| H | -2.419882172 | 1.240954088  | -2.859005206 |
| O | -1.258624089 | 2.781889201  | -2.319042166 |
| H | -1.603834116 | 3.521827254  | -1.836769130 |
| H | -0.841649059 | 2.202945160  | -1.687814122 |
| O | 4.898555355  | 1.223811089  | 1.220679090  |
| H | 5.153323370  | 2.093439151  | 1.496836106  |
| H | 5.159064372  | 0.616756047  | 1.911818138  |
| O | -2.014459145 | -3.598444257 | 0.752886053  |
| H | -2.712799195 | -4.226914303 | 0.876873065  |
| H | -1.405361103 | -3.705627267 | 1.480155106  |
| O | 5.006068360  | -0.809815057 | 3.200795230  |
| H | 4.113504295  | -1.057503078 | 2.972839213  |
| H | 5.517518398  | -1.607607118 | 3.230282235  |
| O | -0.087911005 | -3.367957243 | 2.898261210  |
| H | 0.333840024  | -2.617663190 | 2.550419182  |
| H | 0.577047041  | -3.895495281 | 3.261446235  |

Coord\_6

|   |              |              |              |
|---|--------------|--------------|--------------|
| C | -0.405773030 | -0.288458022 | 0.099605007  |
| N | 0.349053024  | -1.020919076 | 0.940130067  |
| C | 1.615237118  | -0.638775048 | 1.270103091  |
| C | 1.432226104  | 0.922806068  | -0.490410036 |
| N | 0.099168007  | 0.736736055  | -0.595034040 |
| N | 2.129054151  | 0.444028031  | 0.595979045  |
| H | 3.087845225  | 0.698465052  | 0.761090057  |
| N | -1.707619125 | -0.588411043 | 0.001307999  |
| H | -1.978924142 | -1.495302106 | 0.336523022  |
| H | -2.188461155 | -0.250344020 | -0.812638059 |
| H | 1.876397135  | 1.720851123  | -1.063604079 |
| O | 2.261312162  | -1.228643086 | 2.110956151  |
| O | -2.806183204 | 0.376013027  | -2.744976198 |
| H | -2.579903187 | -0.122953011 | -3.517527255 |
| H | -2.431712173 | 1.245664088  | -2.851555206 |
| O | -1.272571089 | 2.785758201  | -2.315753166 |
| H | -1.609313116 | 3.530127257  | -1.834326130 |
| H | -0.845666059 | 2.211812160  | -1.686356122 |
| O | 4.902736352  | 1.220008088  | 1.229052087  |
| H | 5.152209373  | 2.090713153  | 1.506792110  |
| H | 5.161483373  | 0.614038044  | 1.921414137  |
| O | -1.981158143 | -3.585778256 | 0.769545055  |

|   |              |              |             |
|---|--------------|--------------|-------------|
| H | -2.668402192 | -4.226193304 | 0.894595063 |
| H | -1.365849100 | -3.686651267 | 1.492382106 |
| O | 4.998325359  | -0.821523062 | 3.207752233 |
| H | 4.104177297  | -1.063454079 | 2.980995215 |
| H | 5.506666397  | -1.621708115 | 3.227098234 |
| O | -0.043722005 | -3.378087246 | 2.914631208 |
| H | 0.417892030  | -2.641332188 | 2.590107185 |
| H | 0.587894042  | -3.937482283 | 3.289555236 |

Coord\_7

|   |              |              |              |
|---|--------------|--------------|--------------|
| C | -0.414922028 | -0.280857020 | 0.073732007  |
| N | 0.351746028  | -1.030411076 | 0.904660067  |
| C | 1.607054117  | -0.638674044 | 1.262962093  |
| C | 1.447281107  | 0.894849063  | -0.515774036 |
| N | 0.096233005  | 0.737200054  | -0.605753044 |
| N | 2.120103155  | 0.453042031  | 0.608764041  |
| H | 3.079576222  | 0.701622049  | 0.777009058  |
| N | -1.717911126 | -0.581963039 | -0.002517000 |
| H | -1.980097142 | -1.491921108 | 0.332019025  |
| H | -2.212166158 | -0.242398016 | -0.807917057 |
| H | 1.895704135  | 1.690970119  | -1.087492077 |
| O | 2.238740159  | -1.233532091 | 2.113788155  |
| O | -2.817265203 | 0.379830025  | -2.745522198 |
| H | -2.568500184 | -0.118513007 | -3.511550251 |
| H | -2.442212177 | 1.250287092  | -2.843071203 |
| O | -1.285047094 | 2.789623200  | -2.312015169 |
| H | -1.612686119 | 3.538635257  | -1.831542134 |
| H | -0.847753060 | 2.220834161  | -1.684804119 |
| O | 4.904774351  | 1.217433090  | 1.236649088  |
| H | 5.148535369  | 2.089259149  | 1.516093109  |
| H | 5.162095372  | 0.612594046  | 1.930139138  |
| O | -1.947944142 | -3.572474259 | 0.785727057  |
| H | -2.623981191 | -4.224506303 | 0.912020066  |
| H | -1.326161097 | -3.667305266 | 1.503731111  |
| O | 4.989697357  | -0.832300058 | 3.213452229  |
| H | 4.094112293  | -1.068950076 | 2.987971216  |
| H | 5.495351396  | -1.634466118 | 3.222385233  |
| O | 0.000466999  | -3.388217244 | 2.931001210  |
| H | 0.501943036  | -2.665001191 | 2.629796187  |
| H | 0.598741043  | -3.979469286 | 3.317663237  |

Coord\_8

|   |              |              |              |
|---|--------------|--------------|--------------|
| C | -0.423886032 | -0.273419021 | 0.047755003  |
| N | 0.354824024  | -1.040264076 | 0.868456062  |
| C | 1.598526113  | -0.639475044 | 1.255826090  |
| C | 1.462438103  | 0.863475065  | -0.540152041 |
| N | 0.094186004  | 0.737069050  | -0.616470042 |

|   |              |              |              |
|---|--------------|--------------|--------------|
| N | 2.109416150  | 0.461204034  | 0.621373044  |
| H | 3.069326222  | 0.705127049  | 0.792220057  |
| N | -1.727731126 | -0.575447042 | -0.005641998 |
| H | -1.980784142 | -1.488500109 | 0.327939026  |
| H | -2.235636159 | -0.234070015 | -0.801862058 |
| H | 1.917037138  | 1.657388118  | -1.109223079 |
| O | 2.215183162  | -1.240025090 | 2.116213152  |
| O | -2.827139206 | 0.383884026  | -2.744838199 |
| H | -2.556731182 | -0.113753010 | -3.504006253 |
| H | -2.451281174 | 1.254925092  | -2.833426202 |
| O | -1.295854095 | 2.793513203  | -2.307728166 |
| H | -1.613631118 | 3.547392257  | -1.828303130 |
| H | -0.847672059 | 2.230003162  | -1.683145122 |
| O | 4.904496353  | 1.216252088  | 1.243342090  |
| H | 5.142020372  | 2.089280152  | 1.524552108  |
| H | 5.160808371  | 0.612666046  | 1.937904142  |
| O | -1.914983136 | -3.558572254 | 0.801331060  |
| H | -2.579754186 | -4.221844303 | 0.929070067  |
| H | -1.286392093 | -3.647712262 | 1.514022111  |
| O | 4.980312361  | -0.841848061 | 3.217911230  |
| H | 4.083453293  | -1.073825080 | 2.993818217  |
| H | 5.483805394  | -1.645518117 | 3.216208232  |
| O | 0.044655003  | -3.398347247 | 2.947371213  |
| H | 0.585995042  | -2.688670194 | 2.669484190  |
| H | 0.609588044  | -4.021456288 | 3.345772243  |

Coord\_9

|   |              |              |              |
|---|--------------|--------------|--------------|
| C | -0.432648032 | -0.266241018 | 0.021596004  |
| N | 0.358279028  | -1.050646074 | 0.831365060  |
| C | 1.589566116  | -0.641397048 | 1.248668090  |
| C | 1.477665104  | 0.828263060  | -0.563457039 |
| N | 0.093124009  | 0.736194051  | -0.627235047 |
| N | 2.096844153  | 0.468292036  | 0.633738043  |
| H | 3.056943221  | 0.708859051  | 0.806640057  |
| N | -1.737061124 | -0.568819039 | -0.007996001 |
| H | -1.981043142 | -1.484988108 | 0.324315024  |
| H | -2.258893160 | -0.225201015 | -0.794288055 |
| H | 1.940528141  | 1.619700114  | -1.128472082 |
| O | 2.190504155  | -1.248428092 | 2.118145151  |
| O | -2.835737203 | 0.388311027  | -2.742778197 |
| H | -2.544627184 | -0.108553008 | -3.494838252 |
| H | -2.458800180 | 1.259690090  | -2.822473201 |
| O | -1.304758095 | 2.797460199  | -2.302768167 |
| H | -1.611785115 | 3.556437256  | -1.824464129 |
| H | -0.845148058 | 2.239304161  | -1.681362123 |
| O | 4.901694355  | 1.216645087  | 1.248974092  |
| H | 5.132345371  | 2.091003153  | 1.531932109  |

|   |              |              |             |
|---|--------------|--------------|-------------|
| H | 5.157508374  | 0.614526046  | 1.944597139 |
| O | -1.882446133 | -3.544116253 | 0.816239058 |
| H | -2.535959181 | -4.218199304 | 0.945656069 |
| H | -1.246636091 | -3.628015263 | 1.523043112 |
| O | 4.970293358  | -0.849830060 | 3.221141233 |
| H | 4.072343296  | -1.077886076 | 2.998584215 |
| H | 5.472259392  | -1.654457116 | 3.208638229 |
| O | 0.088844008  | -3.408478244 | 2.963741211 |
| H | 0.670047048  | -2.712339197 | 2.709172193 |
| H | 0.620435046  | -4.063443291 | 3.373881244 |

Coord\_10

|   |              |              |              |
|---|--------------|--------------|--------------|
| C | -0.451273034 | -0.206392013 | 0.003103000  |
| N | 0.335008024  | -1.025556076 | 0.800971056  |
| C | 1.561200115  | -0.634017047 | 1.249789088  |
| C | 1.504268109  | 0.801837060  | -0.576528040 |
| N | 0.103719005  | 0.776500058  | -0.629494047 |
| N | 2.086553148  | 0.474402033  | 0.654833049  |
| H | 3.051260222  | 0.693035047  | 0.829636058  |
| N | -1.761930126 | -0.481940035 | -0.002097002 |
| H | -2.016053144 | -1.396358100 | 0.328027023  |
| H | -2.290486164 | -0.124101008 | -0.777553057 |
| H | 1.994073142  | 1.580866114  | -1.135219081 |
| O | 2.132567152  | -1.260817089 | 2.127673152  |
| O | -2.838203206 | 0.497246038  | -2.731611197 |
| H | -2.537536182 | -0.004727003 | -3.476592252 |
| H | -2.441886177 | 1.360718096  | -2.801908204 |
| O | -1.257381088 | 2.873063207  | -2.287704162 |
| H | -1.536893109 | 3.643065260  | -1.810262128 |
| H | -0.797474057 | 2.310325167  | -1.670300122 |
| O | 4.915076353  | 1.160494084  | 1.263647092  |
| H | 5.156067371  | 2.031405147  | 1.548772112  |
| H | 5.158310374  | 0.554636041  | 1.960138143  |
| O | -1.928169138 | -3.446720249 | 0.836115061  |
| H | -2.584562185 | -4.117765299 | 0.966918067  |
| H | -1.286629091 | -3.539599254 | 1.536491109  |
| O | 4.935176357  | -0.916059064 | 3.232391234  |
| H | 4.031943290  | -1.122353083 | 3.011176215  |
| H | 5.419615390  | -1.731207127 | 3.208732232  |
| O | 0.132418007  | -3.422491244 | 2.982061216  |
| H | 0.753433053  | -2.739870199 | 2.750735197  |
| H | 0.630725045  | -4.109244296 | 3.403984244  |

LIIC path connecting S<sub>2</sub>/S<sub>1</sub>/T<sub>2</sub> and S1-MIN

Coord\_1

|   |              |              |             |
|---|--------------|--------------|-------------|
| C | -0.451273034 | -0.206392013 | 0.003103000 |
| N | 0.335008024  | -1.025556076 | 0.800971056 |

|   |              |              |              |
|---|--------------|--------------|--------------|
| C | 1.561200115  | -0.634017047 | 1.249789088  |
| C | 1.504268109  | 0.801837060  | -0.576528040 |
| N | 0.103719005  | 0.776500058  | -0.629494047 |
| N | 2.086553148  | 0.474402033  | 0.654833049  |
| H | 3.051260222  | 0.693035047  | 0.829636058  |
| N | -1.761930126 | -0.481940035 | -0.002097002 |
| H | -2.016053144 | -1.396358100 | 0.328027023  |
| H | -2.290486164 | -0.124101008 | -0.777553057 |
| H | 1.994073142  | 1.580866114  | -1.135219081 |
| O | 2.132567152  | -1.260817089 | 2.127673152  |
| O | -2.838203206 | 0.497246038  | -2.731611197 |
| H | -2.537536182 | -0.004727003 | -3.476592252 |
| H | -2.441886177 | 1.360718096  | -2.801908204 |
| O | -1.257381088 | 2.873063207  | -2.287704162 |
| H | -1.536893109 | 3.643065260  | -1.810262128 |
| H | -0.797474057 | 2.310325167  | -1.670300122 |
| O | 4.915076353  | 1.160494084  | 1.263647092  |
| H | 5.156067371  | 2.031405147  | 1.548772112  |
| H | 5.158310374  | 0.554636041  | 1.960138143  |
| O | -1.928169138 | -3.446720249 | 0.836115061  |
| H | -2.584562185 | -4.117765299 | 0.966918067  |
| H | -1.286629091 | -3.539599254 | 1.536491109  |
| O | 4.935176357  | -0.916059064 | 3.232391234  |
| H | 4.031943290  | -1.122353083 | 3.011176215  |
| H | 5.419615390  | -1.731207127 | 3.208732232  |
| O | 0.132418007  | -3.422491244 | 2.982061216  |
| H | 0.753433053  | -2.739870199 | 2.750735197  |
| H | 0.630725045  | -4.109244296 | 3.403984244  |

Coord\_2

|   |              |              |              |
|---|--------------|--------------|--------------|
| C | -0.459124035 | -0.205068016 | 0.007981998  |
| N | 0.327128025  | -1.012968071 | 0.811189061  |
| C | 1.561595114  | -0.635502045 | 1.249967087  |
| C | 1.501912106  | 0.809239059  | -0.578049043 |
| N | 0.102637007  | 0.773345056  | -0.626459046 |
| N | 2.091878153  | 0.464292032  | 0.645509046  |
| H | 3.057204222  | 0.681297049  | 0.819211060  |
| N | -1.771699130 | -0.478050032 | -0.001329002 |
| H | -2.024570146 | -1.393166102 | 0.327992023  |
| H | -2.291573163 | -0.132169008 | -0.788157055 |
| H | 1.981371142  | 1.605507115  | -1.121314081 |
| O | 2.131996154  | -1.263934091 | 2.126068152  |
| O | -2.831846205 | 0.495555036  | -2.740924198 |
| H | -2.533392184 | -0.002810000 | -3.489150252 |
| H | -2.439121173 | 1.360434098  | -2.810553203 |
| O | -1.260916093 | 2.878279207  | -2.291249163 |
| H | -1.547008110 | 3.647332265  | -1.816123131 |



|   |              |              |              |
|---|--------------|--------------|--------------|
| H | -0.803535057 | 2.317993168  | -1.670325121 |
| O | 4.918670355  | 1.153091085  | 1.263044089  |
| H | 5.157595370  | 2.023572144  | 1.551234114  |
| H | 5.157644372  | 0.546110037  | 1.960065143  |
| O | -1.917303139 | -3.447941246 | 0.841302062  |
| H | -2.572281188 | -4.120306297 | 0.972198071  |
| H | -1.277449093 | -3.537298254 | 1.543760110  |
| O | 4.928511354  | -0.923900068 | 3.229851231  |
| H | 4.025633291  | -1.128019079 | 3.004531215  |
| H | 5.411568387  | -1.739837124 | 3.205960233  |
| O | 0.141701009  | -3.416677248 | 2.988170213  |
| H | 0.766108054  | -2.735388195 | 2.760967199  |
| H | 0.636814045  | -4.108406296 | 3.405629244  |

Coord\_3

|   |              |              |              |
|---|--------------|--------------|--------------|
| C | -0.466831035 | -0.203505012 | 0.013000001  |
| N | 0.319540025  | -1.000141074 | 0.821264061  |
| C | 1.562013111  | -0.636974047 | 1.250264088  |
| C | 1.499462106  | 0.816631056  | -0.579188039 |
| N | 0.101539007  | 0.770381055  | -0.623181047 |
| N | 2.096931150  | 0.454208031  | 0.636313046  |
| H | 3.062876219  | 0.669583049  | 0.808843059  |
| N | -1.781297130 | -0.473822033 | -0.000408001 |
| H | -2.032871148 | -1.389702097 | 0.327863026  |
| H | -2.291966167 | -0.139514010 | -0.798333059 |
| H | 1.968644143  | 1.629603116  | -1.106571081 |
| O | 2.131397152  | -1.267091089 | 2.124599150  |
| O | -2.824946205 | 0.493274033  | -2.750076197 |
| H | -2.528504185 | -0.001685001 | -3.501317254 |
| H | -2.435988174 | 1.359693096  | -2.819127203 |
| O | -1.264590091 | 2.883463207  | -2.294598167 |
| H | -1.557468113 | 3.651597264  | -1.822056129 |
| H | -0.809812057 | 2.325804168  | -1.669968122 |
| O | 4.921879355  | 1.145762080  | 1.262674088  |
| H | 5.158630372  | 2.015791143  | 1.554016110  |
| H | 5.156638369  | 0.537606037  | 1.960149139  |
| O | -1.906212140 | -3.448752247 | 0.846299061  |
| H | -2.559833182 | -4.122379296 | 0.977262069  |
| H | -1.268111094 | -3.534679255 | 1.550832114  |
| O | 4.921670357  | -0.931857069 | 3.227306232  |
| H | 4.019188288  | -1.133865080 | 2.997875218  |
| H | 5.403431387  | -1.748525125 | 3.203100231  |
| O | 0.151006009  | -3.410754246 | 2.994190218  |
| H | 0.778858056  | -2.730927199 | 2.771120200  |
| H | 0.642790049  | -4.107384296 | 3.407347244  |

Coord\_4

|   |              |              |              |
|---|--------------|--------------|--------------|
| C | -0.474394037 | -0.201713017 | 0.018150002  |
| N | 0.312247021  | -0.987083070 | 0.831187061  |
| C | 1.562456112  | -0.638434047 | 1.250675090  |
| C | 1.496927109  | 0.824010057  | -0.579955039 |
| N | 0.100427010  | 0.767600054  | -0.619669046 |
| N | 2.101717151  | 0.444152033  | 0.627241043  |
| H | 3.068279219  | 0.657896048  | 0.798533057  |
| N | -1.790731127 | -0.469274035 | 0.000672002  |
| H | -2.040959146 | -1.385984098 | 0.327655022  |
| H | -2.291690164 | -0.146164011 | -0.808073059 |
| H | 1.955915139  | 1.653147117  | -1.091014080 |
| O | 2.130771151  | -1.270292092 | 2.123265153  |
| O | -2.817492204 | 0.490437035  | -2.759071199 |
| H | -2.522859181 | -0.001315000 | -3.513101254 |
| H | -2.432472177 | 1.358522096  | -2.827627202 |
| O | -1.268388091 | 2.888625210  | -2.297745163 |
| H | -1.568251110 | 3.655862263  | -1.828055131 |
| H | -0.816306057 | 2.333753167  | -1.669229121 |
| O | 4.924693356  | 1.138523084  | 1.262561093  |
| H | 5.159147373  | 2.008081147  | 1.557152110  |
| H | 5.155278373  | 0.529138037  | 1.960413141  |
| O | -1.894907136 | -3.449171250 | 0.851125062  |
| H | -2.547230185 | -4.124004299 | 0.982133072  |
| H | -1.258621088 | -3.531758255 | 1.557724113  |
| O | 4.914641353  | -0.939930070 | 3.224766234  |
| H | 4.012604291  | -1.139900082 | 2.991204214  |
| H | 5.395203390  | -1.757268128 | 3.200161228  |
| O | 0.160338013  | -3.404723245 | 3.000129217  |
| H | 0.791681058  | -2.726490195 | 2.781194201  |
| H | 0.648662048  | -4.106177296 | 3.409150247  |

Coord\_5

|   |              |              |              |
|---|--------------|--------------|--------------|
| C | -0.481810033 | -0.199704016 | 0.023423004  |
| N | 0.305256023  | -0.973801070 | 0.840946063  |
| C | 1.562931112  | -0.639885045 | 1.251196091  |
| C | 1.494317106  | 0.831376062  | -0.580362040 |
| N | 0.099307006  | 0.764996057  | -0.615932044 |
| N | 2.106240150  | 0.434122029  | 0.618289047  |
| H | 3.073414223  | 0.646235045  | 0.788281057  |
| N | -1.800001127 | -0.464423036 | 0.001917998  |
| H | -2.048839146 | -1.382027101 | 0.327383025  |
| H | -2.290764167 | -0.152145010 | -0.817373058 |
| H | 1.943204138  | 1.676133121  | -1.074666080 |
| O | 2.130118152  | -1.273538092 | 2.122063153  |
| O | -2.809473200 | 0.487073034  | -2.767903200 |
| H | -2.516444182 | -0.001669999 | -3.524506251 |
| H | -2.428556176 | 1.356942099  | -2.836046206 |

|   |              |              |              |
|---|--------------|--------------|--------------|
| O | -1.272293091 | 2.893768209  | -2.300685166 |
| H | -1.579333114 | 3.660125262  | -1.834111131 |
| H | -0.823020062 | 2.341834169  | -1.668110122 |
| O | 4.927098355  | 1.131392082  | 1.262729091  |
| H | 5.159119369  | 2.000457142  | 1.560675113  |
| H | 5.153553372  | 0.520719039  | 1.960878139  |
| O | -1.883399134 | -3.449216246 | 0.855796062  |
| H | -2.534483184 | -4.125195297 | 0.986830070  |
| H | -1.248990089 | -3.528549255 | 1.564451115  |
| O | 4.907411353  | -0.948119066 | 3.222240233  |
| H | 4.005870288  | -1.146130081 | 2.984515212  |
| H | 5.386881390  | -1.766059127 | 3.197152231  |
| O | 0.169697010  | -3.398589245 | 3.005991215  |
| H | 0.804574060  | -2.722077196 | 2.791186199  |
| H | 0.654435049  | -4.104785295 | 3.411049247  |

Coord\_6

|   |              |              |              |
|---|--------------|--------------|--------------|
| C | -0.489075033 | -0.197486012 | 0.028814003  |
| N | 0.298574023  | -0.960300070 | 0.850531061  |
| C | 1.563442112  | -0.641329048 | 1.251822092  |
| C | 1.491643110  | 0.838728059  | -0.580416043 |
| N | 0.098184007  | 0.762563053  | -0.611978042 |
| N | 2.110504149  | 0.424119028  | 0.609452046  |
| H | 3.078285220  | 0.634603047  | 0.778087055  |
| N | -1.809108130 | -0.459281031 | 0.003335002  |
| H | -2.056512147 | -1.377846098 | 0.327057025  |
| H | -2.289201163 | -0.157477011 | -0.826226061 |
| H | 1.930533137  | 1.698552123  | -1.057551075 |
| O | 2.129439154  | -1.276834094 | 2.120994152  |
| O | -2.800880203 | 0.483207034  | -2.776567202 |
| H | -2.509252182 | -0.002720998 | -3.535533252 |
| H | -2.424227172 | 1.354972099  | -2.844377207 |
| O | -1.276295090 | 2.898896207  | -2.303411165 |
| H | -1.590697116 | 3.664383266  | -1.840220133 |
| H | -0.829956062 | 2.350037168  | -1.666610122 |
| O | 4.929083357  | 1.124384082  | 1.263206091  |
| H | 5.158520372  | 1.992933141  | 1.564619113  |
| H | 5.151447373  | 0.512360038  | 1.961567144  |
| O | -1.871702136 | -3.448902248 | 0.860325063  |
| H | -2.521608180 | -4.125967297 | 0.991367072  |
| H | -1.239227091 | -3.525066253 | 1.571026111  |
| O | 4.899969353  | -0.956427070 | 3.219735230  |
| H | 3.998981289  | -1.152564082 | 2.977804213  |
| H | 5.378464387  | -1.774894128 | 3.194080230  |
| O | 0.179083011  | -3.392353245 | 3.011781218  |
| H | 0.817532060  | -2.717690195 | 2.801093202  |
| H | 0.660113047  | -4.103207294 | 3.413054246  |

## Coord\_7

|   |              |              |              |
|---|--------------|--------------|--------------|
| C | -0.496183037 | -0.195070017 | 0.034314001  |
| N | 0.292209020  | -0.946587066 | 0.859931064  |
| C | 1.563998113  | -0.642769046 | 1.252550092  |
| C | 1.488916106  | 0.846064059  | -0.580127043 |
| N | 0.097065009  | 0.760294053  | -0.607816042 |
| N | 2.114516154  | 0.414144032  | 0.600727046  |
| H | 3.082897222  | 0.623000047  | 0.767951057  |
| N | -1.818051131 | -0.453863034 | 0.004930000  |
| H | -2.063979150 | -1.373452101 | 0.326691025  |
| H | -2.287013163 | -0.162174009 | -0.834624062 |
| H | 1.917925139  | 1.720400121  | -1.039692073 |
| O | 2.128734152  | -1.280182092 | 2.120058154  |
| O | -2.791704200 | 0.478859033  | -2.785054199 |
| H | -2.501272178 | -0.004447999 | -3.546178256 |
| H | -2.419473176 | 1.352626098  | -2.852608205 |
| O | -1.280384090 | 2.904008207  | -2.305918168 |
| H | -1.602326114 | 3.668629263  | -1.846374131 |
| H | -0.837120058 | 2.358354167  | -1.664731119 |
| O | 4.930636355  | 1.117515080  | 1.264016093  |
| H | 5.157323373  | 1.985523141  | 1.569017110  |
| H | 5.148948371  | 0.504074038  | 1.962504142  |
| O | -1.859828134 | -3.448243248 | 0.864722060  |
| H | -2.508620180 | -4.126333298 | 0.995755073  |
| H | -1.229346087 | -3.521323255 | 1.577458112  |
| O | 4.892302353  | -0.964854069 | 3.217260231  |
| H | 3.991929288  | -1.159212083 | 2.971065215  |
| H | 5.369950385  | -1.783770129 | 3.190953232  |
| O | 0.188491015  | -3.386019242 | 3.017501217  |
| H | 0.830547058  | -2.713331198 | 2.810915203  |
| H | 0.665693046  | -4.101444298 | 3.415173247  |

## Coord\_8

|   |              |              |              |
|---|--------------|--------------|--------------|
| C | -0.503127038 | -0.192461014 | 0.039920005  |
| N | 0.286173018  | -0.932667070 | 0.869135065  |
| C | 1.564606111  | -0.644208048 | 1.253377090  |
| C | 1.486150107  | 0.853385062  | -0.579503043 |
| N | 0.095956007  | 0.758184053  | -0.603454044 |
| N | 2.118285150  | 0.404195029  | 0.592111045  |
| H | 3.087256224  | 0.611427047  | 0.757873056  |
| N | -1.826827133 | -0.448179030 | 0.006707999  |
| H | -2.071240150 | -1.368853096 | 0.326294026  |
| H | -2.284203163 | -0.166250013 | -0.842559059 |
| H | 1.905403139  | 1.741671126  | -1.021113072 |
| O | 2.128003152  | -1.283588094 | 2.119257154  |
| O | -2.781936202 | 0.474048034  | -2.793350201 |

|   |              |              |              |
|---|--------------|--------------|--------------|
| H | -2.492497181 | -0.006831001 | -3.556434256 |
| H | -2.414283175 | 1.349916097  | -2.860730208 |
| O | -1.284554091 | 2.909105211  | -2.308201166 |
| H | -1.614207117 | 3.672856267  | -1.852569135 |
| H | -0.844519062 | 2.366776171  | -1.662473120 |
| O | 4.931745357  | 1.110800080  | 1.265188093  |
| H | 5.155500374  | 1.978241143  | 1.573907116  |
| H | 5.146043373  | 0.495870034  | 1.963713143  |
| O | -1.847792136 | -3.447252247 | 0.868995061  |
| H | -2.495536177 | -4.126303299 | 1.000003070  |
| H | -1.219361089 | -3.517331253 | 1.583757115  |
| O | 4.884398350  | -0.973406071 | 3.214823232  |
| H | 3.984707289  | -1.166085085 | 2.964295212  |
| H | 5.361337385  | -1.792685130 | 3.187780232  |
| O | 0.197915016  | -3.379590241 | 3.023151216  |
| H | 0.843611063  | -2.709001194 | 2.820647201  |
| H | 0.671174047  | -4.099496296 | 3.417411249  |

Coord\_9

|   |              |              |              |
|---|--------------|--------------|--------------|
| C | -0.509895035 | -0.189668011 | 0.045624001  |
| N | 0.280478018  | -0.918545064 | 0.878132063  |
| C | 1.565276113  | -0.645647045 | 1.254302092  |
| C | 1.483358104  | 0.860690063  | -0.578553042 |
| N | 0.094868008  | 0.756229056  | -0.598899045 |
| N | 2.121818155  | 0.394274029  | 0.583601044  |
| H | 3.091369222  | 0.599886045  | 0.747856053  |
| N | -1.835427131 | -0.442237031 | 0.008675999  |
| H | -2.078295152 | -1.364057099 | 0.325876023  |
| H | -2.280772163 | -0.169709012 | -0.850019061 |
| H | 1.892989138  | 1.762360125  | -1.001838071 |
| O | 2.127246153  | -1.287056094 | 2.118592153  |
| O | -2.771569202 | 0.468786033  | -2.801443200 |
| H | -2.482921179 | -0.009859001 | -3.566292257 |
| H | -2.408648173 | 1.346850096  | -2.868729209 |
| O | -1.288800093 | 2.914184212  | -2.310254167 |
| H | -1.626330118 | 3.677056262  | -1.858801134 |
| H | -0.852159059 | 2.375291173  | -1.659836119 |
| O | 4.932397356  | 1.104253078  | 1.266750092  |
| H | 5.153024369  | 1.971098139  | 1.579325113  |
| H | 5.142717372  | 0.487759033  | 1.965220139  |
| O | -1.835609131 | -3.445942247 | 0.873150065  |
| H | -2.482377180 | -4.125886296 | 1.004115074  |
| H | -1.209287089 | -3.513102254 | 1.589930116  |
| O | 4.876246353  | -0.982085070 | 3.212433229  |
| H | 3.977310285  | -1.173194084 | 2.957487214  |
| H | 5.352625387  | -1.801637132 | 3.184569227  |
| O | 0.207347013  | -3.373069243 | 3.028733216  |

|   |             |              |             |
|---|-------------|--------------|-------------|
| H | 0.856711063 | -2.704703196 | 2.830288202 |
| H | 0.676549049 | -4.097365294 | 3.419776247 |

Coord\_10

|   |              |              |              |
|---|--------------|--------------|--------------|
| C | -0.528514036 | -0.198852015 | 0.053044002  |
| N | 0.272746019  | -0.910152065 | 0.884654066  |
| C | 1.562816111  | -0.642046047 | 1.248051090  |
| C | 1.456630102  | 0.873824062  | -0.582809040 |
| N | 0.070876006  | 0.748146053  | -0.594151045 |
| N | 2.110098154  | 0.394877027  | 0.566599039  |
| H | 3.079049219  | 0.607218045  | 0.725546052  |
| N | -1.853804134 | -0.459780034 | 0.017630000  |
| H | -2.085728150 | -1.385158100 | 0.332370023  |
| H | -2.292495164 | -0.199327015 | -0.848195061 |
| H | 1.847113132  | 1.792133130  | -0.988200073 |
| O | 2.132379151  | -1.281374091 | 2.107923151  |
| O | -2.789862203 | 0.433758029  | -2.797952202 |
| H | -2.500767179 | -0.039636000 | -3.565975258 |
| H | -2.439824174 | 1.317267093  | -2.865880208 |
| O | -1.341935098 | 2.902234209  | -2.304437165 |
| H | -1.692337122 | 3.660765265  | -1.855336134 |
| H | -0.901531063 | 2.370124170  | -1.651441118 |
| O | 4.913998355  | 1.132336081  | 1.249375092  |
| H | 5.124980367  | 2.000144144  | 1.565857113  |
| H | 5.128620371  | 0.515414037  | 1.946282139  |
| O | -1.803395127 | -3.468521251 | 0.881142065  |
| H | -2.442738174 | -4.155033300 | 1.014047074  |
| H | -1.175779083 | -3.528008256 | 1.597332115  |
| O | 4.875443353  | -0.958641068 | 3.189077229  |
| H | 3.977989288  | -1.155925083 | 2.933095212  |
| H | 5.358459386  | -1.774142130 | 3.157625225  |
| O | 0.244686019  | -3.374689245 | 3.029956218  |
| H | 0.891092063  | -2.702802195 | 2.833502202  |
| H | 0.717654050  | -4.099522294 | 3.415423246  |

LIIC path connecting S1-MIN and S<sub>1</sub>/T<sub>1</sub>/S<sub>0</sub>-II

Coord\_1

|   |              |              |              |
|---|--------------|--------------|--------------|
| C | -0.528514036 | -0.198852015 | 0.053044002  |
| N | 0.272746019  | -0.910152065 | 0.884654066  |
| C | 1.562816111  | -0.642046047 | 1.248051090  |
| C | 1.456630102  | 0.873824062  | -0.582809040 |
| N | 0.070876006  | 0.748146053  | -0.594151045 |
| N | 2.110098154  | 0.394877027  | 0.566599039  |
| H | 3.079049219  | 0.607218045  | 0.725546052  |
| N | -1.853804134 | -0.459780034 | 0.017630000  |
| H | -2.085728150 | -1.385158100 | 0.332370023  |
| H | -2.292495164 | -0.199327015 | -0.848195061 |

|   |              |              |              |
|---|--------------|--------------|--------------|
| H | 1.847113132  | 1.792133130  | -0.988200073 |
| O | 2.132379151  | -1.281374091 | 2.107923151  |
| O | -2.789862203 | 0.433758029  | -2.797952202 |
| H | -2.500767179 | -0.039636000 | -3.565975258 |
| H | -2.439824174 | 1.317267093  | -2.865880208 |
| O | -1.341935098 | 2.902234209  | -2.304437165 |
| H | -1.692337122 | 3.660765265  | -1.855336134 |
| H | -0.901531063 | 2.370124170  | -1.651441118 |
| O | 4.913998355  | 1.132336081  | 1.249375092  |
| H | 5.124980367  | 2.000144144  | 1.565857113  |
| H | 5.128620371  | 0.515414037  | 1.946282139  |
| O | -1.803395127 | -3.468521251 | 0.881142065  |
| H | -2.442738174 | -4.155033300 | 1.014047074  |
| H | -1.175779083 | -3.528008256 | 1.597332115  |
| O | 4.875443353  | -0.958641068 | 3.189077229  |
| H | 3.977989288  | -1.155925083 | 2.933095212  |
| H | 5.358459386  | -1.774142130 | 3.157625225  |
| O | 0.244686019  | -3.374689245 | 3.029956218  |
| H | 0.891092063  | -2.702802195 | 2.833502202  |
| H | 0.717654050  | -4.099522294 | 3.415423246  |

Coord\_2

|   |              |              |              |
|---|--------------|--------------|--------------|
| C | -0.533043037 | -0.209228016 | 0.066405003  |
| N | 0.270119019  | -0.919401067 | 0.889552062  |
| C | 1.559135112  | -0.628649046 | 1.249666091  |
| C | 1.450239107  | 0.861553061  | -0.588429040 |
| N | 0.053057004  | 0.769748053  | -0.558260042 |
| N | 2.101852149  | 0.421119032  | 0.576653042  |
| H | 3.072243222  | 0.628956043  | 0.732728051  |
| N | -1.856585135 | -0.478082037 | 0.023529004  |
| H | -2.084503152 | -1.405450100 | 0.334892023  |
| H | -2.296033164 | -0.216131017 | -0.841502059 |
| H | 1.859160133  | 1.735344124  | -1.066178077 |
| O | 2.137351153  | -1.264086092 | 2.106140152  |
| O | -2.763214197 | 0.432924030  | -2.795353200 |
| H | -2.488030179 | -0.034937002 | -3.572260259 |
| H | -2.416378172 | 1.317558093  | -2.861852206 |
| O | -1.342985097 | 2.921795209  | -2.301821167 |
| H | -1.713501121 | 3.693669269  | -1.893545134 |
| H | -0.909048063 | 2.425084175  | -1.617547114 |
| O | 4.918280352  | 1.130715084  | 1.251013091  |
| H | 5.135072370  | 1.996293141  | 1.569708115  |
| H | 5.133192372  | 0.510437035  | 1.944771143  |
| O | -1.809182130 | -3.488329250 | 0.878680063  |
| H | -2.440850175 | -4.181146303 | 1.016354075  |
| H | -1.178947087 | -3.540702255 | 1.592672117  |
| O | 4.882587352  | -0.966176071 | 3.187220230  |

|   |             |              |             |
|---|-------------|--------------|-------------|
| H | 3.983822287 | -1.159428083 | 2.933388213 |
| H | 5.362199388 | -1.783594130 | 3.153093229 |
| O | 0.236425018 | -3.379544245 | 3.031412218 |
| H | 0.860606061 | -2.689165192 | 2.830991203 |
| H | 0.732885052 | -4.086517292 | 3.422040248 |

Coord\_3

|   |              |              |              |
|---|--------------|--------------|--------------|
| C | -0.537038039 | -0.220275015 | 0.078766007  |
| N | 0.267812018  | -0.930095067 | 0.893379067  |
| C | 1.555500114  | -0.616763042 | 1.250627088  |
| C | 1.442581102  | 0.846064059  | -0.593278045 |
| N | 0.036557004  | 0.789979055  | -0.520817037 |
| N | 2.092819152  | 0.446289031  | 0.586243041  |
| H | 3.064621223  | 0.650255046  | 0.738715051  |
| N | -1.858648133 | -0.496556038 | 0.028265003  |
| H | -2.082933152 | -1.425649103 | 0.336600022  |
| H | -2.298511163 | -0.232617016 | -0.835912058 |
| H | 1.866165133  | 1.669336120  | -1.141558085 |
| O | 2.142501153  | -1.248465092 | 2.103264153  |
| O | -2.735255196 | 0.433999032  | -2.792766201 |
| H | -2.474005178 | -0.027358003 | -3.578654255 |
| H | -2.391211174 | 1.319745093  | -2.856828208 |
| O | -1.341029099 | 2.940925210  | -2.295612166 |
| H | -1.729288124 | 3.724406270  | -1.928068139 |
| H | -0.916061064 | 2.478823178  | -1.582259115 |
| O | 4.920967355  | 1.131155079  | 1.250588088  |
| H | 5.142630370  | 1.995061143  | 1.570502114  |
| H | 5.136896369  | 0.508515036  | 1.941834140  |
| O | -1.816360129 | -3.507914253 | 0.876441061  |
| H | -2.441667177 | -4.205524302 | 1.019541072  |
| H | -1.183742084 | -3.553147256 | 1.588607115  |
| O | 4.890662353  | -0.969636070 | 3.185499229  |
| H | 3.990800288  | -1.160148081 | 2.934117213  |
| H | 5.367785389  | -1.788447130 | 3.149537227  |
| O | 0.227231018  | -3.384186241 | 3.032930221  |
| H | 0.831876060  | -2.679261195 | 2.825589203  |
| H | 0.744272052  | -4.073884291 | 3.428869248  |

Coord\_4

|   |              |              |              |
|---|--------------|--------------|--------------|
| C | -0.540446041 | -0.232015018 | 0.090215005  |
| N | 0.265899021  | -0.942164065 | 0.896306062  |
| C | 1.552069114  | -0.606321042 | 1.251056092  |
| C | 1.433654105  | 0.827009058  | -0.597309042 |
| N | 0.021555003  | 0.808676056  | -0.481742033 |
| N | 2.083082153  | 0.470320033  | 0.595263042  |
| H | 3.056278220  | 0.671076049  | 0.743287052  |
| N | -1.860010134 | -0.515172039 | 0.031902001  |



|   |              |              |              |
|---|--------------|--------------|--------------|
| H | -2.081108152 | -1.445779106 | 0.337448024  |
| H | -2.299956166 | -0.248760018 | -0.831363060 |
| H | 1.867899135  | 1.593752114  | -1.213884089 |
| O | 2.147845156  | -1.234348088 | 2.099595150  |
| O | -2.706063197 | 0.436915032  | -2.790104201 |
| H | -2.458776176 | -0.016954003 | -3.585059258 |
| H | -2.364424169 | 1.323756098  | -2.850763207 |
| O | -1.336210094 | 2.959711214  | -2.285803162 |
| H | -1.739739126 | 3.753303269  | -1.958743142 |
| H | -0.922501067 | 2.531273184  | -1.545499113 |
| O | 4.922258352  | 1.133506081  | 1.247920092  |
| H | 5.147940373  | 1.996339143  | 1.567962111  |
| H | 5.139864371  | 0.509558034  | 1.937381140  |
| O | -1.824912131 | -3.527363253 | 0.874106061  |
| H | -2.444955178 | -4.228553303 | 1.023063075  |
| H | -1.190169085 | -3.565465258 | 1.584783116  |
| O | 4.899635352  | -0.968914071 | 3.184007230  |
| H | 3.998867289  | -1.157915086 | 2.935372209  |
| H | 5.375107387  | -1.788662129 | 3.147162227  |
| O | 0.216884015  | -3.388595245 | 3.034312220  |
| H | 0.804074056  | -2.672188191 | 2.817539205  |
| H | 0.752285055  | -4.061399291 | 3.435750246  |

Coord\_5

|   |              |              |              |
|---|--------------|--------------|--------------|
| C | -0.543192037 | -0.244494018 | 0.100807006  |
| N | 0.264475021  | -0.955595071 | 0.898441065  |
| C | 1.548998113  | -0.597304041 | 1.251005090  |
| C | 1.423416102  | 0.804057059  | -0.600442041 |
| N | 0.008232003  | 0.825674060  | -0.440963031 |
| N | 2.072696149  | 0.493147036  | 0.603578041  |
| H | 3.047272221  | 0.691400048  | 0.746197056  |
| N | -1.860659133 | -0.533927038 | 0.034491000  |
| H | -2.079087150 | -1.465877104 | 0.337420025  |
| H | -2.300360167 | -0.264549021 | -0.827799062 |
| H | 1.864060134  | 1.508293111  | -1.282575090 |
| O | 2.153443152  | -1.221647087 | 2.095315148  |
| O | -2.675662192 | 0.441609030  | -2.787283200 |
| H | -2.442376174 | -0.003763001 | -3.591373258 |
| H | -2.336049166 | 1.329519097  | -2.843604206 |
| O | -1.328580093 | 2.978193216  | -2.272358165 |
| H | -1.744810126 | 3.780630273  | -1.985378141 |
| H | -0.928220065 | 2.582331184  | -1.507163111 |
| O | 4.922278355  | 1.137675083  | 1.242855088  |
| H | 5.151178371  | 2.000062143  | 1.561855114  |
| H | 5.142152370  | 0.513526038  | 1.931337137  |
| O | -1.834873130 | -3.546750254 | 0.871471065  |
| H | -2.450603176 | -4.250502305 | 1.026577076  |

|   |              |              |             |
|---|--------------|--------------|-------------|
| H | -1.198254087 | -3.577749256 | 1.580955116 |
| O | 4.909407351  | -0.963872070 | 3.182813231 |
| H | 4.007917288  | -1.152545085 | 2.937204210 |
| H | 5.384012387  | -1.784147131 | 3.146147228 |
| O | 0.205248016  | -3.392667243 | 3.035359219 |
| H | 0.776598056  | -2.667301191 | 2.806798204 |
| H | 0.757270053  | -4.048799290 | 3.442473247 |

Coord\_6

|   |              |              |              |
|---|--------------|--------------|--------------|
| C | -0.545184041 | -0.257793020 | 0.110598008  |
| N | 0.263669020  | -0.970434069 | 0.899861065  |
| C | 1.546479113  | -0.589730044 | 1.250476092  |
| C | 1.411786103  | 0.776887056  | -0.602552046 |
| N | -0.003229003 | 0.840788061  | -0.398394029 |
| N | 2.061709149  | 0.514699039  | 0.611020046  |
| H | 3.037644217  | 0.711234051  | 0.747151052  |
| N | -1.860560135 | -0.552858042 | 0.036097001  |
| H | -2.076922148 | -1.486006107 | 0.336536024  |
| H | -2.299688164 | -0.279999023 | -0.825145058 |
| H | 1.854275134  | 1.412726102  | -1.346926097 |
| O | 2.159397153  | -1.210341089 | 2.090535148  |
| O | -2.644006189 | 0.448018033  | -2.784193201 |
| H | -2.424767177 | 0.012173003  | -3.597470258 |
| H | -2.306024168 | 1.336952095  | -2.835260203 |
| O | -1.318077094 | 2.996351214  | -2.255181162 |
| H | -1.744346127 | 3.806589275  | -2.007722142 |
| H | -0.932970066 | 2.631835192  | -1.467087105 |
| O | 4.921101353  | 1.143621082  | 1.235232089  |
| H | 5.152443369  | 2.006215146  | 1.551946112  |
| H | 5.143766371  | 0.520443036  | 1.923617139  |
| O | -1.846383132 | -3.566173255 | 0.868412061  |
| H | -2.458654180 | -4.271600305 | 1.029869072  |
| H | -1.208104087 | -3.590111260 | 1.576937116  |
| O | 4.919838356  | -0.954308069 | 3.181966230  |
| H | 4.017813289  | -1.143807083 | 2.939626212  |
| H | 5.394325390  | -1.774728130 | 3.146654227  |
| O | 0.192206014  | -3.396208243 | 3.035823217  |
| H | 0.748889055  | -2.664082190 | 2.792990202  |
| H | 0.759501054  | -4.035726288 | 3.448743246  |

Coord\_7

|   |              |              |              |
|---|--------------|--------------|--------------|
| C | -0.546299038 | -0.272052019 | 0.119666011  |
| N | 0.263678022  | -0.986788069 | 0.900637066  |
| C | 1.544768113  | -0.583660042 | 1.249442091  |
| C | 1.398636102  | 0.745183052  | -0.603459045 |
| N | -0.012649003 | 0.853789062  | -0.353904023 |
| N | 2.050166148  | 0.534898036  | 0.617392044  |

|   |              |              |              |
|---|--------------|--------------|--------------|
| H | 3.027424216  | 0.730612051  | 0.745797051  |
| N | -1.859661131 | -0.572069039 | 0.036834002  |
| H | -2.074692148 | -1.506292106 | 0.334874026  |
| H | -2.297871166 | -0.295172021 | -0.823276057 |
| H | 1.838100133  | 1.306919096  | -1.406100099 |
| O | 2.165860154  | -1.200485088 | 2.085317149  |
| O | -2.610955186 | 0.456057034  | -2.780677200 |
| H | -2.405813175 | 0.030792004  | -3.603166259 |
| H | -2.274162162 | 1.345933096  | -2.825571206 |
| O | -1.304470095 | 3.014067216  | -2.234080161 |
| H | -1.738011124 | 3.831286278  | -2.025423148 |
| H | -0.936356070 | 2.679532192  | -1.425003104 |
| O | 4.918762353  | 1.151386081  | 1.224865088  |
| H | 5.151759371  | 2.014867146  | 1.537978113  |
| H | 5.144674370  | 0.530424038  | 1.914116137  |
| O | -1.859767136 | -3.585797259 | 0.864885063  |
| H | -2.469376178 | -4.292093308 | 1.032846075  |
| H | -1.219968087 | -3.602723258 | 1.572578113  |
| O | 4.930764358  | -0.939917068 | 3.181485229  |
| H | 4.028408291  | -1.131394082 | 2.942610211  |
| H | 5.405868391  | -1.760106127 | 3.148825224  |
| O | 0.177616015  | -3.398888246 | 3.035333220  |
| H | 0.720275050  | -2.662048191 | 2.775246201  |
| H | 0.759219055  | -4.021632287 | 3.454091249  |

Coord\_8

|   |              |              |              |
|---|--------------|--------------|--------------|
| C | -0.546373038 | -0.287522018 | 0.128158009  |
| N | 0.264816017  | -1.004869072 | 0.900844064  |
| C | 1.544248112  | -0.579203041 | 1.247842092  |
| C | 1.383784102  | 0.708655053  | -0.602904044 |
| N | -0.019878004 | 0.864364061  | -0.307281020 |
| N | 2.038124148  | 0.553658042  | 0.622468044  |
| H | 3.016634218  | 0.749629057  | 0.741708051  |
| N | -1.857896135 | -0.591787040 | 0.036910002  |
| H | -2.072554150 | -1.526982111 | 0.332625023  |
| H | -2.294804165 | -0.310226024 | -0.821965057 |
| H | 1.814995132  | 1.190889083  | -1.459119103 |
| O | 2.173060155  | -1.192258086 | 2.079698149  |
| O | -2.576211186 | 0.465572033  | -2.776470198 |
| H | -2.385214172 | 0.051964005  | -3.608168259 |
| H | -2.240066161 | 1.356254100  | -2.814252205 |
| O | -1.287240094 | 3.031050218  | -2.208679160 |
| H | -1.725150122 | 3.854668277  | -2.037955144 |
| H | -0.937744070 | 2.724986194  | -1.380453100 |
| O | 4.915255352  | 1.161156085  | 1.211541088  |
| H | 5.149058371  | 2.026229148  | 1.519666109  |
| H | 5.144813369  | 0.543748039  | 1.902696138  |

|   |              |              |             |
|---|--------------|--------------|-------------|
| O | -1.875709135 | -3.605928262 | 0.860967061 |
| H | -2.483430179 | -4.312322310 | 1.035581075 |
| H | -1.234379087 | -3.615900258 | 1.567759113 |
| O | 4.942025355  | -0.920230065 | 3.181345230 |
| H | 4.039577291  | -1.114878079 | 2.946067210 |
| H | 5.418513389  | -1.739786128 | 3.152768225 |
| O | 0.161247012  | -3.400096246 | 3.033264216 |
| H | 0.689747052  | -2.660655190 | 2.751789197 |
| H | 0.756677052  | -4.005553290 | 3.457710250 |

Coord\_9

|   |              |              |              |
|---|--------------|--------------|--------------|
| C | -0.545179040 | -0.304681024 | 0.136358007  |
| N | 0.267629018  | -1.025078076 | 0.900590065  |
| C | 1.545535113  | -0.576551043 | 1.245603090  |
| C | 1.366963097  | 0.667072050  | -0.600495044 |
| N | -0.024841004 | 0.872040063  | -0.258125021 |
| N | 2.025660145  | 0.570895043  | 0.626021046  |
| H | 3.005287219  | 0.768506058  | 0.734380052  |
| N | -1.855195135 | -0.612509045 | 0.036736003  |
| H | -2.070835149 | -1.548587111 | 0.330203026  |
| H | -2.290323167 | -0.325541022 | -0.820789061 |
| H | 1.784277128  | 1.064939077  | -1.504814109 |
| O | 2.181329158  | -1.186067088 | 2.073704147  |
| O | -2.539177182 | 0.476246035  | -2.771098197 |
| H | -2.362352170 | 0.075403006  | -3.611966259 |
| H | -2.202932158 | 1.367501101  | -2.800759201 |
| O | -1.265317091 | 3.046667218  | -2.178248156 |
| H | -1.704471124 | 3.876375281  | -2.044444149 |
| H | -0.936034066 | 2.767381198  | -1.332607095 |
| O | 4.910508352  | 1.173427086  | 1.195019084  |
| H | 5.144107373  | 2.040830149  | 1.496733107  |
| H | 5.144097371  | 0.561010039  | 1.889178136  |
| O | -1.895640136 | -3.627169262 | 0.856984060  |
| H | -2.502286183 | -4.332850312 | 1.038489073  |
| H | -1.252453088 | -3.630240263 | 1.562412110  |
| O | 4.953549354  | -0.894501065 | 3.181422231  |
| H | 4.051312294  | -1.093634078 | 2.949789215  |
| H | 5.432298392  | -1.712932123 | 3.158474226  |
| O | 0.142689010  | -3.398578243 | 3.028430219  |
| H | 0.655524048  | -2.659163191 | 2.718913197  |
| H | 0.752195053  | -3.985584289 | 3.458065248  |

Coord\_10

|   |              |              |              |
|---|--------------|--------------|--------------|
| C | -0.542679037 | -0.313289024 | 0.155888013  |
| N | 0.271979019  | -1.056551078 | 0.892797062  |
| C | 1.549357112  | -0.594863042 | 1.246452091  |
| C | 1.348649098  | 0.646652048  | -0.561765042 |

|   |              |              |              |
|---|--------------|--------------|--------------|
| N | -0.026274000 | 0.894693067  | -0.165181011 |
| N | 2.014081144  | 0.581812044  | 0.660302048  |
| H | 2.994884218  | 0.779150056  | 0.760245056  |
| N | -1.852298133 | -0.619415046 | 0.041062001  |
| H | -2.072390147 | -1.562821112 | 0.309467020  |
| H | -2.284787163 | -0.304507020 | -0.807365057 |
| H | 1.746071124  | 0.978772071  | -1.500164107 |
| O | 2.190152157  | -1.222662086 | 2.055813146  |
| O | -2.498641178 | 0.572666041  | -2.731083195 |
| H | -2.336800169 | 0.206473014  | -3.590335261 |
| H | -2.159778155 | 1.463796104  | -2.729688199 |
| O | -1.232392090 | 3.126873227  | -2.046259147 |
| H | -1.667943119 | 3.960723288  | -1.927594139 |
| H | -0.925171067 | 2.850878203  | -1.191430088 |
| O | 4.906577354  | 1.166705085  | 1.221135087  |
| H | 5.139989368  | 2.029385145  | 1.536289112  |
| H | 5.143999373  | 0.543479037  | 1.904202139  |
| O | -1.927764137 | -3.653831265 | 0.783632055  |
| H | -2.535338181 | -4.361271316 | 0.955511069  |
| H | -1.281447091 | -3.668203264 | 1.486016109  |
| O | 4.965363358  | -0.932913068 | 3.176402228  |
| H | 4.063382293  | -1.131146083 | 2.943686214  |
| H | 5.446320394  | -1.749595126 | 3.140434225  |
| O | 0.117196007  | -3.450725248 | 2.952999215  |
| H | 0.611185043  | -2.708221192 | 2.620999187  |
| H | 0.741587055  | -4.028244288 | 3.372324241  |

LIIC path connecting S<sub>1</sub>/T<sub>1</sub>/S<sub>0</sub>-II and S<sub>0</sub>-MIN

Coord\_1

|   |              |              |              |
|---|--------------|--------------|--------------|
| C | -0.542679037 | -0.313289024 | 0.155888013  |
| N | 0.271979019  | -1.056551078 | 0.892797062  |
| C | 1.549357112  | -0.594863042 | 1.246452091  |
| C | 1.348649098  | 0.646652048  | -0.561765042 |
| N | -0.026274000 | 0.894693067  | -0.165181011 |
| N | 2.014081144  | 0.581812044  | 0.660302048  |
| H | 2.994884218  | 0.779150056  | 0.760245056  |
| N | -1.852298133 | -0.619415046 | 0.041062001  |
| H | -2.072390147 | -1.562821112 | 0.309467020  |
| H | -2.284787163 | -0.304507020 | -0.807365057 |
| H | 1.746071124  | 0.978772071  | -1.500164107 |
| O | 2.190152157  | -1.222662086 | 2.055813146  |
| O | -2.498641178 | 0.572666041  | -2.731083195 |
| H | -2.336800169 | 0.206473014  | -3.590335261 |
| H | -2.159778155 | 1.463796104  | -2.729688199 |
| O | -1.232392090 | 3.126873227  | -2.046259147 |
| H | -1.667943119 | 3.960723288  | -1.927594139 |
| H | -0.925171067 | 2.850878203  | -1.191430088 |

|   |              |              |             |
|---|--------------|--------------|-------------|
| O | 4.906577354  | 1.166705085  | 1.221135087 |
| H | 5.139989368  | 2.029385145  | 1.536289112 |
| H | 5.143999373  | 0.543479037  | 1.904202139 |
| O | -1.927764137 | -3.653831265 | 0.783632055 |
| H | -2.535338181 | -4.361271316 | 0.955511069 |
| H | -1.281447091 | -3.668203264 | 1.486016109 |
| O | 4.965363358  | -0.932913068 | 3.176402228 |
| H | 4.063382293  | -1.131146083 | 2.943686214 |
| H | 5.446320394  | -1.749595126 | 3.140434225 |
| O | 0.117196007  | -3.450725248 | 2.952999215 |
| H | 0.611185043  | -2.708221192 | 2.620999187 |
| H | 0.741587055  | -4.028244288 | 3.372324241 |

Coord\_2

|   |              |              |              |
|---|--------------|--------------|--------------|
| C | -0.521951037 | -0.315171021 | 0.163903011  |
| N | 0.279914021  | -1.047836074 | 0.916799065  |
| C | 1.561065111  | -0.601019046 | 1.252952092  |
| C | 1.349879096  | 0.687986051  | -0.538498039 |
| N | -0.009387001 | 0.875898061  | -0.207009017 |
| N | 2.029488144  | 0.560325040  | 0.645737047  |
| H | 3.006999218  | 0.769039056  | 0.750323057  |
| N | -1.829570134 | -0.620049043 | 0.039589004  |
| H | -2.060145150 | -1.557788112 | 0.315446024  |
| H | -2.260278165 | -0.303195021 | -0.808990060 |
| H | 1.752951126  | 1.072358078  | -1.435757103 |
| O | 2.209537158  | -1.222688090 | 2.059779150  |
| O | -2.524652182 | 0.548122038  | -2.730936195 |
| H | -2.369181171 | 0.167047012  | -3.583361260 |
| H | -2.181981158 | 1.436124103  | -2.746642196 |
| O | -1.227759090 | 3.086264223  | -2.077880150 |
| H | -1.656573122 | 3.907895279  | -1.918582139 |
| H | -0.912294068 | 2.774627201  | -1.247331092 |
| O | 4.901840355  | 1.175449083  | 1.216493086  |
| H | 5.139705369  | 2.038392144  | 1.526861110  |
| H | 5.142847370  | 0.553448038  | 1.899727136  |
| O | -1.951749138 | -3.653061265 | 0.772297057  |
| H | -2.574114183 | -4.346159311 | 0.938555066  |
| H | -1.312129094 | -3.680696266 | 1.479088104  |
| O | 4.972251356  | -0.913911065 | 3.174352227  |
| H | 4.072148294  | -1.120490083 | 2.941663211  |
| H | 5.458270391  | -1.727105125 | 3.149756227  |
| O | 0.074995005  | -3.437506247 | 2.939459209  |
| H | 0.543221042  | -2.688114193 | 2.595334186  |
| H | 0.718722052  | -3.995295289 | 3.347327241  |

Coord\_3

|   |              |              |             |
|---|--------------|--------------|-------------|
| C | -0.501223037 | -0.317052024 | 0.171917014 |
|---|--------------|--------------|-------------|

|   |              |              |              |
|---|--------------|--------------|--------------|
| N | 0.287850018  | -1.039121075 | 0.940800069  |
| C | 1.572773115  | -0.607174044 | 1.259451092  |
| C | 1.351109095  | 0.729319054  | -0.515232037 |
| N | 0.007500003  | 0.857102061  | -0.248836018 |
| N | 2.044894145  | 0.538838041  | 0.631171047  |
| H | 3.019114218  | 0.758929056  | 0.740401052  |
| N | -1.806842130 | -0.620683045 | 0.038116002  |
| H | -2.047899147 | -1.552755113 | 0.321426023  |
| H | -2.235768162 | -0.301883021 | -0.810614057 |
| H | 1.759831129  | 1.165943086  | -1.371349098 |
| O | 2.228921159  | -1.222714089 | 2.063744148  |
| O | -2.550663186 | 0.523577040  | -2.730787194 |
| H | -2.401561172 | 0.127620010  | -3.576385259 |
| H | -2.204183159 | 1.408452102  | -2.763596199 |
| O | -1.223126090 | 3.045654219  | -2.109501152 |
| H | -1.645203119 | 3.855066276  | -1.909570140 |
| H | -0.899416064 | 2.698375193  | -1.303232095 |
| O | 4.897101350  | 1.184192086  | 1.211850085  |
| H | 5.139419370  | 2.047399149  | 1.517433108  |
| H | 5.141694372  | 0.563416038  | 1.895252138  |
| O | -1.975734145 | -3.652289264 | 0.760963054  |
| H | -2.612889186 | -4.331046310 | 0.921598068  |
| H | -1.342811098 | -3.693187267 | 1.472159105  |
| O | 4.979138360  | -0.894910066 | 3.172301226  |
| H | 4.080914295  | -1.109833078 | 2.939639214  |
| H | 5.470218393  | -1.704615124 | 3.159077229  |
| O | 0.032794003  | -3.424286245 | 2.925919209  |
| H | 0.475257035  | -2.668006193 | 2.569668184  |
| H | 0.695858049  | -3.962345285 | 3.322328241  |

Coord\_4

|   |              |              |              |
|---|--------------|--------------|--------------|
| C | -0.480496032 | -0.318934022 | 0.179931012  |
| N | 0.295785020  | -1.030407076 | 0.964802067  |
| C | 1.584480114  | -0.613330042 | 1.265951093  |
| C | 1.352340099  | 0.770652057  | -0.491965034 |
| N | 0.024387001  | 0.838306061  | -0.290664019 |
| N | 2.060300146  | 0.517351037  | 0.616605046  |
| H | 3.031228218  | 0.748818055  | 0.730479053  |
| N | -1.784115126 | -0.621318047 | 0.036643000  |
| H | -2.035654144 | -1.547721113 | 0.327405023  |
| H | -2.211259159 | -0.300571021 | -0.812238060 |
| H | 1.766711126  | 1.259528093  | -1.306942094 |
| O | 2.248305159  | -1.222739087 | 2.067709151  |
| O | -2.576673184 | 0.499032037  | -2.730639199 |
| H | -2.433941173 | 0.088194009  | -3.569410259 |
| H | -2.226385161 | 1.380780100  | -2.780549202 |
| O | -1.218493085 | 3.005044215  | -2.141121154 |

|   |              |              |              |
|---|--------------|--------------|--------------|
| H | -1.633833116 | 3.802237273  | -1.900558135 |
| H | -0.886539064 | 2.622123191  | -1.359133099 |
| O | 4.892363351  | 1.192936084  | 1.207208089  |
| H | 5.139133371  | 2.056405147  | 1.508005106  |
| H | 5.140542369  | 0.573384039  | 1.890777135  |
| O | -1.999718146 | -3.651518263 | 0.749628056  |
| H | -2.651664189 | -4.315933310 | 0.904642065  |
| H | -1.373493097 | -3.705679269 | 1.465231106  |
| O | 4.986024359  | -0.875908063 | 3.170250230  |
| H | 4.089679296  | -1.099177078 | 2.937616212  |
| H | 5.482167395  | -1.682125122 | 3.168398226  |
| O | -0.009406999 | -3.411067244 | 2.912379209  |
| H | 0.407293028  | -2.647898193 | 2.544002183  |
| H | 0.672993046  | -3.929395285 | 3.297330236  |

Coord\_5

|   |              |              |              |
|---|--------------|--------------|--------------|
| C | -0.459768033 | -0.320815025 | 0.187946016  |
| N | 0.303720023  | -1.021691071 | 0.988803071  |
| C | 1.596188113  | -0.619485045 | 1.272451093  |
| C | 1.353570097  | 0.811986060  | -0.468698036 |
| N | 0.041274005  | 0.819511061  | -0.332491025 |
| N | 2.075707147  | 0.495864038  | 0.602040045  |
| H | 3.043342217  | 0.738707055  | 0.720557053  |
| N | -1.761386127 | -0.621952043 | 0.035170004  |
| H | -2.023408147 | -1.542688113 | 0.333384022  |
| H | -2.186749156 | -0.299259021 | -0.813863057 |
| H | 1.773591129  | 1.353113100  | -1.242535089 |
| O | 2.267689165  | -1.222765086 | 2.071674149  |
| O | -2.602683188 | 0.474488034  | -2.730491199 |
| H | -2.466322180 | 0.048768002  | -3.562434258 |
| H | -2.248587163 | 1.353108099  | -2.797503200 |
| O | -1.213860085 | 2.964435211  | -2.172742157 |
| H | -1.622462118 | 3.749408270  | -1.891546135 |
| H | -0.873662065 | 2.545871184  | -1.415034103 |
| O | 4.887625352  | 1.201680087  | 1.202565088  |
| H | 5.138847372  | 2.065412146  | 1.498577110  |
| H | 5.139388371  | 0.583353040  | 1.886301137  |
| O | -2.023703147 | -3.650746263 | 0.738293053  |
| H | -2.690440191 | -4.300820309 | 0.887686061  |
| H | -1.404175101 | -3.718170265 | 1.458302107  |
| O | 4.992911357  | -0.856906059 | 3.168199229  |
| H | 4.098444297  | -1.088520078 | 2.935592209  |
| H | 5.494115397  | -1.659634121 | 3.177719228  |
| O | -0.051608006 | -3.397847243 | 2.898839209  |
| H | 0.339328026  | -2.627790188 | 2.518336181  |
| H | 0.650128049  | -3.896445281 | 3.272332236  |



## Coord\_6

|   |              |              |              |
|---|--------------|--------------|--------------|
| C | -0.439040033 | -0.322697023 | 0.195961014  |
| N | 0.311655025  | -1.012977073 | 1.012805074  |
| C | 1.607895117  | -0.625641044 | 1.278950094  |
| C | 1.354800096  | 0.853319063  | -0.445432034 |
| N | 0.058161004  | 0.800715056  | -0.374319025 |
| N | 2.091113153  | 0.474377034  | 0.587474045  |
| H | 3.055457222  | 0.728596055  | 0.710634049  |
| N | -1.738659123 | -0.622586045 | 0.033697002  |
| H | -2.011163144 | -1.537655108 | 0.339364026  |
| H | -2.162239158 | -0.297947022 | -0.815487060 |
| H | 1.780471127  | 1.446698107  | -1.178127085 |
| O | 2.287073166  | -1.222790089 | 2.075640148  |
| O | -2.628694192 | 0.449943031  | -2.730342198 |
| H | -2.498702181 | 0.009342000  | -3.555459257 |
| H | -2.270789165 | 1.325436098  | -2.814456203 |
| O | -1.209227086 | 2.923825212  | -2.204362159 |
| H | -1.611092115 | 3.696579267  | -1.882534135 |
| H | -0.860784061 | 2.469619177  | -1.470935107 |
| O | 4.882886353  | 1.210423085  | 1.197923087  |
| H | 5.138561367  | 2.074418150  | 1.489149108  |
| H | 5.138236368  | 0.593321041  | 1.881826133  |
| O | -2.047688148 | -3.649975262 | 0.726958050  |
| H | -2.729215199 | -4.285707308 | 0.870729063  |
| H | -1.434856104 | -3.730662267 | 1.451374102  |
| O | 4.999798361  | -0.837905061 | 3.166148228  |
| H | 4.107210298  | -1.077864078 | 2.933568212  |
| H | 5.506064394  | -1.637144120 | 3.187040230  |
| O | -0.093808008 | -3.384627242 | 2.885298209  |
| H | 0.271364019  | -2.607681188 | 2.492670180  |
| H | 0.627263046  | -3.863495276 | 3.247334236  |

## Coord\_7

|   |              |              |              |
|---|--------------|--------------|--------------|
| C | -0.418312028 | -0.324579026 | 0.203975017  |
| N | 0.319591022  | -1.004262074 | 1.036806072  |
| C | 1.619603116  | -0.631796047 | 1.285450094  |
| C | 1.356030099  | 0.894652066  | -0.422165031 |
| N | 0.075049008  | 0.781919055  | -0.416146031 |
| N | 2.106519154  | 0.452890030  | 0.572909039  |
| H | 3.067571222  | 0.718485049  | 0.700712049  |
| N | -1.715931124 | -0.623220047 | 0.032224000  |
| H | -1.998917146 | -1.532622109 | 0.345343025  |
| H | -2.137729155 | -0.296634022 | -0.817112057 |
| H | 1.787351129  | 1.540284109  | -1.113719080 |
| O | 2.306457167  | -1.222816088 | 2.079605151  |
| O | -2.654704190 | 0.425399029  | -2.730194198 |
| H | -2.531082183 | -0.030085002 | -3.548483257 |

|   |              |              |              |
|---|--------------|--------------|--------------|
| H | -2.292991167 | 1.297764091  | -2.831410206 |
| O | -1.204594086 | 2.883215208  | -2.235983161 |
| H | -1.599722118 | 3.643750264  | -1.873522136 |
| H | -0.847907061 | 2.393367175  | -1.526837112 |
| O | 4.878147353  | 1.219167088  | 1.193280086  |
| H | 5.138275368  | 2.083425149  | 1.479721106  |
| H | 5.137082370  | 0.603290041  | 1.877351135  |
| O | -2.071672149 | -3.649204261 | 0.715624052  |
| H | -2.767990202 | -4.270594308 | 0.853773060  |
| H | -1.465538108 | -3.743154268 | 1.444445103  |
| O | 5.006684359  | -0.818903058 | 3.164097227  |
| H | 4.115975299  | -1.067207078 | 2.931544210  |
| H | 5.518012396  | -1.614654118 | 3.196360232  |
| O | -0.136009010 | -3.371407240 | 2.871758209  |
| H | 0.203400013  | -2.587573188 | 2.467004178  |
| H | 0.604399044  | -3.830545277 | 3.222335231  |

Coord\_8

|   |              |              |              |
|---|--------------|--------------|--------------|
| C | -0.397584028 | -0.326460023 | 0.211989015  |
| N | 0.327526024  | -0.995547069 | 1.060808076  |
| C | 1.631310115  | -0.637952046 | 1.291949095  |
| C | 1.357260098  | 0.935986069  | -0.398898028 |
| N | 0.091936006  | 0.763124055  | -0.457974032 |
| N | 2.121925154  | 0.431403031  | 0.558343038  |
| H | 3.079685222  | 0.708374049  | 0.690790050  |
| N | -1.693202120 | -0.623854044 | 0.030751003  |
| H | -1.986671143 | -1.527588109 | 0.351322024  |
| H | -2.113220152 | -0.295322022 | -0.818736060 |
| H | 1.794231127  | 1.633869116  | -1.049312076 |
| O | 2.325841168  | -1.222841086 | 2.083570149  |
| O | -2.680715194 | 0.400854031  | -2.730046198 |
| H | -2.563462184 | -0.069511004 | -3.541508256 |
| H | -2.315193169 | 1.270091090  | -2.848363203 |
| O | -1.199960086 | 2.842605204  | -2.267603164 |
| H | -1.588352115 | 3.590921261  | -1.864509136 |
| H | -0.835029062 | 2.317115167  | -1.582738116 |
| O | 4.873409349  | 1.227910091  | 1.188637085  |
| H | 5.137989369  | 2.092431148  | 1.470293104  |
| H | 5.135929372  | 0.613258042  | 1.872876137  |
| O | -2.095657150 | -3.648432260 | 0.704289049  |
| H | -2.806765204 | -4.255480307 | 0.836816062  |
| H | -1.496220107 | -3.755645270 | 1.437517104  |
| O | 5.013571363  | -0.799901059 | 3.162046226  |
| H | 4.124740299  | -1.056550078 | 2.929521213  |
| H | 5.529961398  | -1.592163117 | 3.205681229  |
| O | -0.178210011 | -3.358188244 | 2.858218203  |
| H | 0.135436011  | -2.567465182 | 2.441338177  |

H 0.581534041 -3.797595272 3.197337231

Coord\_9

C -0.376856028 -0.328342026 0.220004018  
N 0.335461027 -0.986832071 1.084809079  
C 1.643018119 -0.644108044 1.298449095  
C 1.358490096 0.977319072 -0.375632025  
N 0.108823010 0.744328055 -0.499801038  
N 2.137332155 0.409916027 0.543777038  
H 3.091800221 0.698264049 0.680868051  
N -1.670475121 -0.624488046 0.029278001  
H -1.974426140 -1.522555110 0.357301024  
H -2.088710148 -0.294010022 -0.820361057  
H 1.801111130 1.727454123 -0.984904071  
O 2.345225169 -1.222867090 2.087535153  
O -2.706725192 0.376309028 -2.729898198  
H -2.595843186 -0.108937005 -3.534533255  
H -2.337395171 1.242419088 -2.865317206  
O -1.195327086 2.801995200 -2.299224166  
H -1.576982112 3.538091253 -1.855497136  
H -0.822152058 2.240864160 -1.638639119  
O 4.868671350 1.236654089 1.183995084  
H 5.137704370 2.101438152 1.460865108  
H 5.134777369 0.623227043 1.868400134  
O -2.119642151 -3.647661265 0.692954051  
H -2.845541207 -4.240367306 0.819860059  
H -1.526902110 -3.768137271 1.430588104  
O 5.020458361 -0.780899056 3.159995230  
H 4.133506295 -1.045894078 2.927497210  
H 5.541909400 -1.569673116 3.215002231  
O -0.220411013 -3.344968243 2.844677203  
H 0.067471004 -2.547357183 2.415672176  
H 0.558669038 -3.764645273 3.172339226

Coord\_10

C -0.357476028 -0.325875023 0.229680018  
N 0.341885027 -0.973917071 1.110492078  
C 1.653274120 -0.646333049 1.306678092  
C 1.358668096 1.022653073 -0.350634025  
N 0.124605007 0.729787053 -0.539943037  
N 2.151526155 0.392262029 0.530966037  
H 3.102758223 0.691790052 0.672735046  
N -1.649147119 -0.620508046 0.029419001  
H -1.963775141 -1.512845109 0.364878027  
H -2.065503149 -0.287993023 -0.820383060  
H 1.807123128 1.824952131 -0.918745067  
O 2.363013171 -1.219113085 2.093251151

|   |              |              |              |
|---|--------------|--------------|--------------|
| O | -2.733839197 | 0.356619025  | -2.728166195 |
| H | -2.629401188 | -0.143525009 | -3.525973252 |
| H | -2.360519169 | 1.219526087  | -2.880668210 |
| O | -1.191319087 | 2.765921198  | -2.329191167 |
| H | -1.566105111 | 3.489871251  | -1.844840131 |
| H | -0.810044059 | 2.169065158  | -1.692877120 |
| O | 4.862872351  | 1.248671090  | 1.181207087  |
| H | 5.136525369  | 2.113660152  | 1.453307107  |
| H | 5.132414370  | 0.636409044  | 1.865785136  |
| O | -2.145668152 | -3.642177264 | 0.683196049  |
| H | -2.886480206 | -4.220391304 | 0.804450057  |
| H | -1.559679111 | -3.776041274 | 1.425256104  |
| O | 5.025804364  | -0.758670055 | 3.159791227  |
| H | 4.140683299  | -1.031827075 | 2.927287212  |
| H | 5.552154399  | -1.544063112 | 3.226183233  |
| O | -0.264665017 | -3.327435241 | 2.832781203  |
| H | -0.002365999 | -2.522987184 | 2.391665171  |
| H | 0.533658036  | -3.727547270 | 3.149010225  |

### Relaxation pathway II

LIIC path connecting Franck-Condon point and S2-MIN  
Coord\_1

|   |              |              |              |
|---|--------------|--------------|--------------|
| C | -0.357476028 | -0.325875023 | 0.229680018  |
| N | 0.341885027  | -0.973917071 | 1.110492078  |
| C | 1.653274120  | -0.646333049 | 1.306678092  |
| C | 1.358668096  | 1.022653073  | -0.350634025 |
| N | 0.124605007  | 0.729787053  | -0.539943037 |
| N | 2.151526155  | 0.392262029  | 0.530966037  |
| H | 3.102758223  | 0.691790052  | 0.672735046  |
| N | -1.649147119 | -0.620508046 | 0.029419001  |
| H | -1.963775141 | -1.512845109 | 0.364878027  |
| H | -2.065503149 | -0.287993023 | -0.820383060 |
| H | 1.807123128  | 1.824952131  | -0.918745067 |
| O | 2.363013171  | -1.219113085 | 2.093251151  |
| O | -2.733839197 | 0.356619025  | -2.728166195 |
| H | -2.629401188 | -0.143525009 | -3.525973252 |
| H | -2.360519169 | 1.219526087  | -2.880668210 |
| O | -1.191319087 | 2.765921198  | -2.329191167 |
| H | -1.566105111 | 3.489871251  | -1.844840131 |
| H | -0.810044059 | 2.169065158  | -1.692877120 |
| O | 4.862872351  | 1.248671090  | 1.181207087  |
| H | 5.136525369  | 2.113660152  | 1.453307107  |
| H | 5.132414370  | 0.636409044  | 1.865785136  |
| O | -2.145668152 | -3.642177264 | 0.683196049  |
| H | -2.886480206 | -4.220391304 | 0.804450057  |
| H | -1.559679111 | -3.776041274 | 1.425256104  |
| O | 5.025804364  | -0.758670055 | 3.159791227  |

|   |              |              |             |
|---|--------------|--------------|-------------|
| H | 4.140683299  | -1.031827075 | 2.927287212 |
| H | 5.552154399  | -1.544063112 | 3.226183233 |
| O | -0.264665017 | -3.327435241 | 2.832781203 |
| H | -0.002365999 | -2.522987184 | 2.391665171 |
| H | 0.533658036  | -3.727547270 | 3.149010225 |

Coord\_2

|   |              |              |              |
|---|--------------|--------------|--------------|
| C | -0.367493025 | -0.277263018 | 0.202057014  |
| N | 0.333983024  | -0.946383069 | 1.085242079  |
| C | 1.636560120  | -0.617508045 | 1.282939090  |
| C | 1.376283099  | 1.037864072  | -0.390286028 |
| N | 0.123079008  | 0.761646053  | -0.563603039 |
| N | 2.152493158  | 0.417777029  | 0.521839037  |
| H | 3.107330224  | 0.701816051  | 0.669254049  |
| N | -1.666373119 | -0.562082041 | 0.024512003  |
| H | -1.977725142 | -1.456849102 | 0.356030024  |
| H | -2.090216150 | -0.228759017 | -0.821380057 |
| H | 1.819912131  | 1.847309134  | -0.951043067 |
| O | 2.345433167  | -1.197668087 | 2.081917148  |
| O | -2.748976196 | 0.409718030  | -2.737848197 |
| H | -2.620342187 | -0.095803006 | -3.528554256 |
| H | -2.365659168 | 1.269630092  | -2.883449205 |
| O | -1.181122085 | 2.802998203  | -2.340746170 |
| H | -1.544216113 | 3.530386252  | -1.852783134 |
| H | -0.798047055 | 2.202807161  | -1.707958122 |
| O | 4.878166351  | 1.228652087  | 1.180623087  |
| H | 5.162155370  | 2.092990150  | 1.444366102  |
| H | 5.146078373  | 0.618975046  | 1.867658132  |
| O | -2.162849156 | -3.864777277 | 0.722967054  |
| H | -2.826355203 | -4.527771329 | 0.863957060  |
| H | -1.561509112 | -3.911604283 | 1.461801106  |
| O | 5.040195360  | -0.776793058 | 3.170882226  |
| H | 4.152326299  | -1.051665073 | 2.953969212  |
| H | 5.567072403  | -1.562092112 | 3.236787231  |
| O | -0.278422022 | -3.297652235 | 2.822904205  |
| H | -0.021850004 | -2.506912181 | 2.357866171  |
| H | 0.471070036  | -3.661052265 | 3.276681237  |

Coord\_3

|   |              |              |              |
|---|--------------|--------------|--------------|
| C | -0.376743027 | -0.236194016 | 0.176057011  |
| N | 0.327890024  | -0.925842064 | 1.060981075  |
| C | 1.621022116  | -0.593247040 | 1.260484088  |
| C | 1.391966098  | 1.047248073  | -0.427806028 |
| N | 0.120413008  | 0.786980059  | -0.585224041 |
| N | 2.152158157  | 0.439803032  | 0.514411039  |
| H | 3.109760222  | 0.710306049  | 0.667447047  |
| N | -1.681990119 | -0.513055039 | 0.021720001  |

|   |              |              |              |
|---|--------------|--------------|--------------|
| H | -1.988758144 | -1.410906103 | 0.348630026  |
| H | -2.114098152 | -0.178955014 | -0.819790059 |
| H | 1.830882134  | 1.864222137  | -0.980313072 |
| O | 2.329861169  | -1.179691084 | 2.071830151  |
| O | -2.764848201 | 0.454044033  | -2.746350196 |
| H | -2.611854189 | -0.056326002 | -3.529454254 |
| H | -2.372415169 | 1.311285094  | -2.884223206 |
| O | -1.174778086 | 2.832674204  | -2.349142170 |
| H | -1.527167112 | 3.562504258  | -1.857121134 |
| H | -0.789231057 | 2.229123161  | -1.720363121 |
| O | 4.889684354  | 1.210696087  | 1.181889085  |
| H | 5.182132372  | 2.074767148  | 1.437413105  |
| H | 5.157391373  | 0.603981041  | 1.871150136  |
| O | -2.171551159 | -4.042379290 | 0.762117052  |
| H | -2.758101196 | -4.772692345 | 0.916424064  |
| H | -1.559417110 | -4.021775287 | 1.491901110  |
| O | 5.055273366  | -0.793067058 | 3.183171230  |
| H | 4.165456298  | -1.071316076 | 2.981859213  |
| H | 5.584320401  | -1.577189115 | 3.248297233  |
| O | -0.287656022 | -3.280410238 | 2.805370203  |
| H | -0.036747005 | -2.499169180 | 2.323938167  |
| H | 0.398132028  | -3.595485261 | 3.381302241  |

Coord\_4

|   |              |              |              |
|---|--------------|--------------|--------------|
| C | -0.384910026 | -0.201770014 | 0.151990009  |
| N | 0.323990025  | -0.911311063 | 1.038074076  |
| C | 1.607096118  | -0.572790043 | 1.239492087  |
| C | 1.406313104  | 1.051346075  | -0.463379032 |
| N | 0.117096008  | 0.806454057  | -0.604796043 |
| N | 2.151056156  | 0.458922032  | 0.508546036  |
| H | 3.110727225  | 0.717754049  | 0.666996050  |
| N | -1.695750124 | -0.472401033 | 0.021571000  |
| H | -1.996753145 | -1.373833098 | 0.343427023  |
| H | -2.136932155 | -0.137703012 | -0.815097061 |
| H | 1.840649132  | 1.876083137  | -1.006903070 |
| O | 2.316733165  | -1.164367085 | 2.063231148  |
| O | -2.781340201 | 0.490256035  | -2.753246196 |
| H | -2.604024186 | -0.024596000 | -3.528167253 |
| H | -2.380517174 | 1.345046099  | -2.882808208 |
| O | -1.171629085 | 2.855469207  | -2.354687170 |
| H | -1.514128110 | 3.586956258  | -1.858284133 |
| H | -0.782980056 | 2.248621163  | -1.730306124 |
| O | 4.898412355  | 1.195215086  | 1.184346087  |
| H | 5.197597376  | 2.059478148  | 1.431542105  |
| H | 5.167301370  | 0.591966045  | 1.875727133  |
| O | -2.176871157 | -4.181502301 | 0.797770057  |
| H | -2.690438196 | -4.964629357 | 0.957064067  |

|   |              |              |             |
|---|--------------|--------------|-------------|
| H | -1.556008113 | -4.110773296 | 1.515827108 |
| O | 5.071923368  | -0.806598057 | 3.196476228 |
| H | 4.180919301  | -1.089821076 | 3.010935217 |
| H | 5.604663403  | -1.588512117 | 3.260664232 |
| O | -0.291413021 | -3.273211237 | 2.783810199 |
| H | -0.046764002 | -2.498466179 | 2.290601164 |
| H | 0.316965022  | -3.531347254 | 3.466187251 |

Coord\_5

|   |              |              |              |
|---|--------------|--------------|--------------|
| C | -0.391937029 | -0.173190014 | 0.129584009  |
| N | 0.322293022  | -0.902105067 | 1.016221072  |
| C | 1.594798113  | -0.555691040 | 1.219737086  |
| C | 1.419685100  | 1.050780077  | -0.497188034 |
| N | 0.113424010  | 0.820842058  | -0.622551046 |
| N | 2.149375155  | 0.475591036  | 0.504044034  |
| H | 3.110519226  | 0.724512050  | 0.667726050  |
| N | -1.707621120 | -0.439160029 | 0.023761000  |
| H | -2.001823144 | -1.344609094 | 0.340058026  |
| H | -2.158606155 | -0.103979006 | -0.807589057 |
| H | 1.849665132  | 1.883522136  | -1.030865073 |
| O | 2.305966165  | -1.151381085 | 2.055910150  |
| O | -2.798218203 | 0.519636035  | -2.758834197 |
| H | -2.596701188 | 0.000698001  | -3.525022252 |
| H | -2.389575170 | 1.372132100  | -2.879469205 |
| O | -1.171019086 | 2.872431206  | -2.357572170 |
| H | -1.504347110 | 3.604855260  | -1.856447131 |
| H | -0.778750056 | 2.262283165  | -1.737990127 |
| O | 4.904822353  | 1.182382083  | 1.187863084  |
| H | 5.209121375  | 2.047293149  | 1.426638103  |
| H | 5.176171370  | 0.583063040  | 1.881254135  |
| O | -2.181855155 | -4.288882308 | 0.829937059  |
| H | -2.628949192 | -5.112985368 | 0.985593071  |
| H | -1.552444110 | -4.182898303 | 1.535205113  |
| O | 5.090315367  | -0.817226058 | 3.210634233  |
| H | 4.198886303  | -1.106913078 | 3.041004217  |
| H | 5.628156407  | -1.595950116 | 3.273724237  |
| O | -0.288459022 | -3.274164237 | 2.760468201  |
| H | -0.052113005 | -2.504139181 | 2.257454163  |
| H | 0.230203015  | -3.466813252 | 3.533311253  |

Coord\_6

|   |              |              |              |
|---|--------------|--------------|--------------|
| C | -0.398391028 | -0.149012011 | 0.107202008  |
| N | 0.321797024  | -0.897504067 | 0.993548071  |
| C | 1.583125113  | -0.541777039 | 1.199990085  |
| C | 1.432169101  | 1.046847073  | -0.529586038 |
| N | 0.109427008  | 0.831881061  | -0.639395048 |
| N | 2.146634155  | 0.490277038  | 0.500436034  |

|   |              |              |              |
|---|--------------|--------------|--------------|
| H | 3.108726226  | 0.730693052  | 0.669600047  |
| N | -1.718203126 | -0.411485027 | 0.026089999  |
| H | -2.004950142 | -1.321446096 | 0.335680027  |
| H | -2.179356158 | -0.075339007 | -0.799391059 |
| H | 1.858406135  | 1.888071134  | -1.051805078 |
| O | 2.296103163  | -1.141271080 | 2.048518147  |
| O | -2.814931203 | 0.546069042  | -2.765083198 |
| H | -2.589292188 | 0.023834000  | -3.522248252 |
| H | -2.398723173 | 1.396353099  | -2.875549208 |
| O | -1.171740085 | 2.886712207  | -2.357889169 |
| H | -1.496551107 | 3.619176262  | -1.851371136 |
| H | -0.775721056 | 2.272790164  | -1.743744125 |
| O | 4.908580353  | 1.171551084  | 1.193208086  |
| H | 5.216532375  | 2.037380146  | 1.424053104  |
| H | 5.183261372  | 0.576170041  | 1.888244138  |
| O | -2.186354157 | -4.377511316 | 0.864411063  |
| H | -2.574000183 | -5.233085378 | 1.010848071  |
| H | -1.547006110 | -4.246253308 | 1.555724114  |
| O | 5.108913365  | -0.826743062 | 3.225333232  |
| H | 4.217829303  | -1.124048080 | 3.071302223  |
| H | 5.653011407  | -1.601453115 | 3.286891236  |
| O | -0.276303021 | -3.281116235 | 2.736715196  |
| H | -0.054627004 | -2.516092179 | 2.221508158  |
| H | 0.142617010  | -3.393732244 | 3.583359260  |

Coord\_7

|   |              |              |              |
|---|--------------|--------------|--------------|
| C | -0.408003030 | -0.123088009 | 0.077134003  |
| N | 0.316242023  | -0.894926063 | 0.961294072  |
| C | 1.566014114  | -0.531054040 | 1.174475084  |
| C | 1.442942102  | 1.044584073  | -0.562216039 |
| N | 0.104087006  | 0.846948060  | -0.659595046 |
| N | 2.139424152  | 0.503956037  | 0.495676038  |
| H | 3.102064223  | 0.735305054  | 0.672685049  |
| N | -1.731542123 | -0.381064030 | 0.018091004  |
| H | -2.012086145 | -1.296380092 | 0.316843020  |
| H | -2.201420161 | -0.040503004 | -0.800754056 |
| H | 1.868152135  | 1.895538137  | -1.068200079 |
| O | 2.278777165  | -1.137560082 | 2.034731148  |
| O | -2.829689205 | 0.587410041  | -2.781495202 |
| H | -2.579718186 | 0.064314007  | -3.530411256 |
| H | -2.404674174 | 1.435121106  | -2.877559209 |
| O | -1.168937086 | 2.912362212  | -2.356169168 |
| H | -1.485529107 | 3.643055264  | -1.842054134 |
| H | -0.770955053 | 2.291906163  | -1.749200127 |
| O | 4.906320353  | 1.157511085  | 1.204370085  |
| H | 5.217456377  | 2.023461144  | 1.430632106  |
| H | 5.183193373  | 0.563755040  | 1.899506136  |



|   |              |              |             |
|---|--------------|--------------|-------------|
| O | -2.176404159 | -4.499754325 | 0.932577067 |
| H | -2.502265179 | -5.380185387 | 1.082032079 |
| H | -1.524200110 | -4.332104310 | 1.603423114 |
| O | 5.118091368  | -0.846220060 | 3.239428233 |
| H | 4.227892302  | -1.150562083 | 3.098451223 |
| H | 5.668299407  | -1.617074115 | 3.297774237 |
| O | -0.246753018 | -3.286350237 | 2.713239195 |
| H | -0.064966006 | -2.534461181 | 2.168808158 |
| H | 0.069168007  | -3.274005235 | 3.613083262 |

Coord\_8

|   |              |              |              |
|---|--------------|--------------|--------------|
| C | -0.383126027 | -0.173025011 | 0.120639009  |
| N | 0.371931028  | -0.934173066 | 1.009777074  |
| C | 1.605542115  | -0.534045039 | 1.204202087  |
| C | 1.457227104  | 0.984359072  | -0.573254041 |
| N | 0.105157008  | 0.778338055  | -0.635207044 |
| N | 2.159374155  | 0.498963038  | 0.514453035  |
| H | 3.120358224  | 0.743843054  | 0.680495049  |
| N | -1.705355125 | -0.451919032 | 0.108610005  |
| H | -1.958616139 | -1.370474098 | 0.420916030  |
| H | -2.201502157 | -0.134507009 | -0.704139049 |
| H | 1.859827134  | 1.840862131  | -1.087223080 |
| O | 2.340979167  | -1.113744079 | 2.080239148  |
| O | -2.861796204 | 0.443381033  | -2.706769193 |
| H | -2.588606184 | -0.092679008 | -3.438278247 |
| H | -2.444536175 | 1.293691093  | -2.813321202 |
| O | -1.220419089 | 2.791695199  | -2.338787166 |
| H | -1.535200112 | 3.526445252  | -1.829468130 |
| H | -0.801043056 | 2.185925158  | -1.730685126 |
| O | 4.927731357  | 1.194471084  | 1.185397086  |
| H | 5.228086379  | 2.071330147  | 1.382494100  |
| H | 5.227687379  | 0.624215043  | 1.890156135  |
| O | -2.272347164 | -4.037391292 | 0.709162052  |
| H | -2.678425195 | -4.895670354 | 0.671276046  |
| H | -1.626407119 | -4.068261291 | 1.405998100  |
| O | 5.217579374  | -0.761812056 | 3.265923233  |
| H | 4.333071313  | -1.093000076 | 3.157647228  |
| H | 5.789343416  | -1.516493109 | 3.330989238  |
| O | -0.260003018 | -3.369695241 | 2.677718193  |
| H | 0.033647000  | -2.573793185 | 2.238968160  |
| H | -0.139172008 | -3.476904249 | 3.608675258  |

Coord\_9

|   |              |              |              |
|---|--------------|--------------|--------------|
| C | -0.383634027 | -0.177627012 | 0.101790006  |
| N | 0.383744027  | -0.956462070 | 0.986740073  |
| C | 1.602092117  | -0.537677037 | 1.187044087  |
| C | 1.466488108  | 0.964669069  | -0.596611041 |

|   |              |              |              |
|---|--------------|--------------|--------------|
| N | 0.100279009  | 0.767226058  | -0.644562046 |
| N | 2.154687153  | 0.503668037  | 0.517255039  |
| H | 3.114238226  | 0.748801053  | 0.689601052  |
| N | -1.706192125 | -0.462776035 | 0.114800009  |
| H | -1.945664140 | -1.388680097 | 0.415529032  |
| H | -2.215247160 | -0.144395008 | -0.689668051 |
| H | 1.862941136  | 1.834144130  | -1.092189081 |
| O | 2.343158170  | -1.117934083 | 2.074270150  |
| O | -2.877469206 | 0.437958029  | -2.709825197 |
| H | -2.578259186 | -0.096238005 | -3.432580247 |
| H | -2.457182178 | 1.288488090  | -2.801429203 |
| O | -1.234810091 | 2.782284200  | -2.323310166 |
| H | -1.546200109 | 3.512411254  | -1.805430131 |
| H | -0.808289058 | 2.172480156  | -1.723569126 |
| O | 4.922560353  | 1.198532085  | 1.200100085  |
| H | 5.217855377  | 2.078331152  | 1.391808101  |
| H | 5.231233374  | 0.632997047  | 1.904507136  |
| O | -2.285170165 | -3.983255284 | 0.725415054  |
| H | -2.704201197 | -4.831201346 | 0.643748045  |
| H | -1.629108119 | -4.058977294 | 1.410164101  |
| O | 5.245907380  | -0.759495053 | 3.283274235  |
| H | 4.366191315  | -1.105728080 | 3.189493232  |
| H | 5.830780418  | -1.504643111 | 3.344209239  |
| O | -0.204812016 | -3.414949246 | 2.653029191  |
| H | 0.056896005  | -2.621112188 | 2.194218159  |
| H | -0.221829018 | -3.380905242 | 3.598780258  |

Coord\_10

|   |              |              |              |
|---|--------------|--------------|--------------|
| C | -0.373591026 | -0.216509014 | 0.096070008  |
| N | 0.391908030  | -1.007749071 | 0.993653070  |
| C | 1.592742116  | -0.571826041 | 1.213374089  |
| C | 1.499077108  | 0.898384062  | -0.590315044 |
| N | 0.118952008  | 0.714147050  | -0.641966046 |
| N | 2.155088153  | 0.470830033  | 0.562369040  |
| H | 3.111154223  | 0.715774053  | 0.752050053  |
| N | -1.697154121 | -0.504147038 | 0.118751010  |
| H | -1.929674139 | -1.434006103 | 0.412078029  |
| H | -2.207295161 | -0.190024015 | -0.686825052 |
| H | 1.899777138  | 1.775449129  | -1.067684078 |
| O | 2.324976169  | -1.146852085 | 2.127243153  |
| O | -2.842168205 | 0.383047026  | -2.740070196 |
| H | -2.509548182 | -0.156216013 | -3.444381249 |
| H | -2.414772172 | 1.231371090  | -2.817512201 |
| O | -1.196135087 | 2.720983196  | -2.330915168 |
| H | -1.509102106 | 3.451587251  | -1.814755129 |
| H | -0.772810058 | 2.110702152  | -1.728699123 |
| O | 4.914020353  | 1.165513081  | 1.289280094  |

|   |              |              |             |
|---|--------------|--------------|-------------|
| H | 5.203465375  | 2.049216147  | 1.471849108 |
| H | 5.220375377  | 0.610337042  | 2.002503142 |
| O | -2.284770166 | -3.608108261 | 0.685903050 |
| H | -2.832611205 | -4.362884312 | 0.518890038 |
| H | -1.676933121 | -3.839280279 | 1.382490100 |
| O | 5.237757378  | -0.776232056 | 3.396705247 |
| H | 4.363718317  | -1.136281081 | 3.308363238 |
| H | 5.833102422  | -1.512325108 | 3.468175248 |
| O | -0.184234012 | -3.475678252 | 2.664271191 |
| H | 0.055879006  | -2.686603196 | 2.188077158 |
| H | -0.394389030 | -3.202874230 | 3.547525255 |

LIIC path connecting S2-MIN and S<sub>1</sub>/T<sub>1</sub>/S<sub>0</sub>-III

Coord\_1

|   |              |              |              |
|---|--------------|--------------|--------------|
| C | -0.373591026 | -0.216509014 | 0.096070008  |
| N | 0.391908030  | -1.007749071 | 0.993653070  |
| C | 1.592742116  | -0.571826041 | 1.213374089  |
| C | 1.499077108  | 0.898384062  | -0.590315044 |
| N | 0.118952008  | 0.714147050  | -0.641966046 |
| N | 2.155088153  | 0.470830033  | 0.562369040  |
| H | 3.111154223  | 0.715774053  | 0.752050053  |
| N | -1.697154121 | -0.504147038 | 0.118751010  |
| H | -1.929674139 | -1.434006103 | 0.412078029  |
| H | -2.207295161 | -0.190024015 | -0.686825052 |
| H | 1.899777138  | 1.775449129  | -1.067684078 |
| O | 2.324976169  | -1.146852085 | 2.127243153  |
| O | -2.842168205 | 0.383047026  | -2.740070196 |
| H | -2.509548182 | -0.156216013 | -3.444381249 |
| H | -2.414772172 | 1.231371090  | -2.817512201 |
| O | -1.196135087 | 2.720983196  | -2.330915168 |
| H | -1.509102106 | 3.451587251  | -1.814755129 |
| H | -0.772810058 | 2.110702152  | -1.728699123 |
| O | 4.914020353  | 1.165513081  | 1.289280094  |
| H | 5.203465375  | 2.049216147  | 1.471849108  |
| H | 5.220375377  | 0.610337042  | 2.002503142  |
| O | -2.284770166 | -3.608108261 | 0.685903050  |
| H | -2.832611205 | -4.362884312 | 0.518890038  |
| H | -1.676933121 | -3.839280279 | 1.382490100  |
| O | 5.237757378  | -0.776232056 | 3.396705247  |
| H | 4.363718317  | -1.136281081 | 3.308363238  |
| H | 5.833102422  | -1.512325108 | 3.468175248  |
| O | -0.184234012 | -3.475678252 | 2.664271191  |
| H | 0.055879006  | -2.686603196 | 2.188077158  |
| H | -0.394389030 | -3.202874230 | 3.547525255  |

Coord\_2

|   |              |              |             |
|---|--------------|--------------|-------------|
| C | -0.368060028 | -0.222811017 | 0.079568007 |
|---|--------------|--------------|-------------|

|   |              |              |              |
|---|--------------|--------------|--------------|
| N | 0.408348028  | -1.038021074 | 0.953040071  |
| C | 1.604017116  | -0.576814039 | 1.217599088  |
| C | 1.514780110  | 0.866322065  | -0.604043045 |
| N | 0.125185006  | 0.708580052  | -0.653746050 |
| N | 2.155832155  | 0.475060033  | 0.572330040  |
| H | 3.109655223  | 0.727447052  | 0.762948056  |
| N | -1.693960124 | -0.491703033 | 0.125367012  |
| H | -1.932505137 | -1.425033103 | 0.400926031  |
| H | -2.218597159 | -0.155197014 | -0.662474045 |
| H | 1.931644139  | 1.719798124  | -1.109320077 |
| O | 2.307265168  | -1.137349083 | 2.148796156  |
| O | -2.856040205 | 0.383334025  | -2.726894196 |
| H | -2.524913183 | -0.156151009 | -3.431748248 |
| H | -2.428735175 | 1.231596091  | -2.805521204 |
| O | -1.209218084 | 2.721137197  | -2.323740165 |
| H | -1.511542111 | 3.456226246  | -1.807654131 |
| H | -0.775114058 | 2.114499152  | -1.725529124 |
| O | 4.918879354  | 1.172522087  | 1.293172092  |
| H | 5.203382374  | 2.055391148  | 1.487315107  |
| H | 5.216535376  | 0.611695043  | 2.005593146  |
| O | -2.246766164 | -3.592087261 | 0.690141051  |
| H | -2.777513201 | -4.357699312 | 0.517256039  |
| H | -1.638420119 | -3.813248277 | 1.389554102  |
| O | 5.201847373  | -0.784146056 | 3.389979245  |
| H | 4.321256309  | -1.126337079 | 3.294107240  |
| H | 5.782312418  | -1.532106108 | 3.459605249  |
| O | -0.159606013 | -3.466296251 | 2.711962195  |
| H | 0.130400011  | -2.695479192 | 2.266817161  |
| H | -0.379513027 | -3.202689229 | 3.594909257  |

Coord\_3

|   |              |              |              |
|---|--------------|--------------|--------------|
| C | -0.361884027 | -0.229159017 | 0.061929005  |
| N | 0.426084033  | -1.067657079 | 0.909403067  |
| C | 1.614309116  | -0.582527042 | 1.221398088  |
| C | 1.530951110  | 0.832760061  | -0.617163042 |
| N | 0.132311008  | 0.703214052  | -0.666064047 |
| N | 2.155836155  | 0.478426034  | 0.582163042  |
| H | 3.107280222  | 0.738052055  | 0.774334056  |
| N | -1.689151120 | -0.481282035 | 0.133075007  |
| H | -1.932377139 | -1.418228101 | 0.390732029  |
| H | -2.228310160 | -0.122737011 | -0.635637043 |
| H | 1.964713140  | 1.661206121  | -1.149007085 |
| O | 2.286232166  | -1.131194079 | 2.168750155  |
| O | -2.868137208 | 0.384090029  | -2.713668194 |
| H | -2.538583180 | -0.154800009 | -3.419721245 |
| H | -2.441446177 | 1.232601088  | -2.792953202 |
| O | -1.221652088 | 2.722327195  | -2.315315166 |

|   |              |              |              |
|---|--------------|--------------|--------------|
| H | -1.513055108 | 3.461440251  | -1.798733129 |
| H | -0.776027058 | 2.119145153  | -1.722106125 |
| O | 4.922661352  | 1.180570084  | 1.296276092  |
| H | 5.201452374  | 2.062813150  | 1.501332107  |
| H | 5.212385377  | 0.614818046  | 2.008018143  |
| O | -2.212798160 | -3.576632258 | 0.694325049  |
| H | -2.728805198 | -4.351050311 | 0.516031036  |
| H | -1.603541116 | -3.790058275 | 1.395372099  |
| O | 5.167212373  | -0.789098059 | 3.382982241  |
| H | 4.280678309  | -1.113999079 | 3.280184237  |
| H | 5.733214411  | -1.548140110 | 3.450689248  |
| O | -0.134977008 | -3.456914251 | 2.759652199  |
| H | 0.204921016  | -2.704354193 | 2.345555169  |
| H | -0.364637024 | -3.202504229 | 3.642292264  |

Coord\_4

|   |              |              |              |
|---|--------------|--------------|--------------|
| C | -0.355349026 | -0.235300018 | 0.043232003  |
| N | 0.444792031  | -1.096309080 | 0.862726062  |
| C | 1.623224117  | -0.589031043 | 1.224717088  |
| C | 1.547400114  | 0.797190058  | -0.629994045 |
| N | 0.140193008  | 0.698047049  | -0.679040050 |
| N | 2.154918155  | 0.480616034  | 0.591565040  |
| H | 3.103918222  | 0.747101055  | 0.785808058  |
| N | -1.682981120 | -0.472569031 | 0.142122012  |
| H | -1.929731137 | -1.413219100 | 0.381785028  |
| H | -2.236758163 | -0.092401005 | -0.605994042 |
| H | 1.998951146  | 1.598915117  | -1.187228087 |
| O | 2.261461162  | -1.128558083 | 2.186937156  |
| O | -2.878947209 | 0.386058029  | -2.700245195 |
| H | -2.551318185 | -0.151574012 | -3.408160246 |
| H | -2.453110175 | 1.234977089  | -2.779756198 |
| O | -1.233070087 | 2.724760199  | -2.305821165 |
| H | -1.512956110 | 3.467575251  | -1.788209127 |
| H | -0.775332058 | 2.124752152  | -1.718660123 |
| O | 4.925193354  | 1.189210083  | 1.298344096  |
| H | 5.197533372  | 2.071085149  | 1.513449107  |
| H | 5.207617374  | 0.619424047  | 2.009759147  |
| O | -2.181215158 | -3.561963259 | 0.698630049  |
| H | -2.684285193 | -4.343723312 | 0.515382037  |
| H | -1.570279113 | -3.769399269 | 1.400039099  |
| O | 5.133229367  | -0.791066059 | 3.376130242  |
| H | 4.241312306  | -1.099240082 | 3.266932236  |
| H | 5.685147410  | -1.560460113 | 3.442180247  |
| O | -0.110349009 | -3.447531250 | 2.807342203  |
| H | 0.279442021  | -2.713229194 | 2.424294177  |
| H | -0.349760026 | -3.202319229 | 3.689675266  |

## Coord\_5

|   |              |              |              |
|---|--------------|--------------|--------------|
| C | -0.348743026 | -0.241001020 | 0.023506000  |
| N | 0.464141032  | -1.123654082 | 0.812947056  |
| C | 1.630355120  | -0.596399042 | 1.227447087  |
| C | 1.563869110  | 0.759108055  | -0.642828049 |
| N | 0.148683011  | 0.693098051  | -0.692794049 |
| N | 2.152881156  | 0.481341033  | 0.600202043  |
| H | 3.099442224  | 0.754131053  | 0.796943059  |
| N | -1.675649120 | -0.465390033 | 0.152573009  |
| H | -1.924902140 | -1.409814103 | 0.374112027  |
| H | -2.244118161 | -0.064094007 | -0.573460039 |
| H | 2.034207146  | 1.532147109  | -1.224393089 |
| O | 2.232537159  | -1.129598081 | 2.203094160  |
| O | -2.888925206 | 0.390038029  | -2.686507192 |
| H | -2.563837186 | -0.145789009 | -3.396966242 |
| H | -2.463915175 | 1.239386088  | -2.765878197 |
| O | -1.243131091 | 2.728720196  | -2.295378164 |
| H | -1.510598106 | 3.475009250  | -1.776216129 |
| H | -0.772835056 | 2.131483154  | -1.715378123 |
| O | 4.926275352  | 1.197995087  | 1.299171094  |
| H | 5.191440372  | 2.079809149  | 1.523292111  |
| H | 5.201871377  | 0.625206044  | 2.010824142  |
| O | -2.150259156 | -3.548268257 | 0.703416050  |
| H | -2.641567190 | -4.336463312 | 0.515781037  |
| H | -1.536615111 | -3.750757270 | 1.403931102  |
| O | 5.099186368  | -0.790090055 | 3.369799245  |
| H | 4.202405300  | -1.082094077 | 3.254596236  |
| H | 5.637355407  | -1.569158115 | 3.434790250  |
| O | -0.085721005 | -3.438149250 | 2.855032207  |
| H | 0.353963026  | -2.722104195 | 2.503033180  |
| H | -0.334884022 | -3.202133228 | 3.737058268  |

## Coord\_6

|   |              |              |              |
|---|--------------|--------------|--------------|
| C | -0.342377024 | -0.246027018 | 0.002756003  |
| N | 0.483767036  | -1.149358083 | 0.759983055  |
| C | 1.635256116  | -0.604703045 | 1.229440090  |
| C | 1.580020113  | 0.718015050  | -0.655928049 |
| N | 0.157614010  | 0.688427051  | -0.707433050 |
| N | 2.149507153  | 0.480334035  | 0.607719043  |
| H | 3.093717224  | 0.758692053  | 0.807292057  |
| N | -1.667345123 | -0.459703034 | 0.164296010  |
| H | -1.918156136 | -1.407995099 | 0.367454025  |
| H | -2.250438162 | -0.037863003 | -0.538237039 |
| H | 2.070204148  | 1.460096107  | -1.260845093 |
| O | 2.199019157  | -1.134444080 | 2.216896161  |
| O | -2.898510209 | 0.396909030  | -2.672357194 |
| H | -2.576825185 | -0.136658008 | -3.386068244 |

|   |              |              |              |
|---|--------------|--------------|--------------|
| H | -2.474041178 | 1.246571087  | -2.751260199 |
| O | -1.251505088 | 2.734571198  | -2.284050162 |
| H | -1.505357108 | 3.484170250  | -1.762829125 |
| H | -0.768352057 | 2.139562156  | -1.712417123 |
| O | 4.925685357  | 1.206432088  | 1.298584094  |
| H | 5.182972372  | 2.088541150  | 1.530537108  |
| H | 5.194739375  | 0.631805043  | 2.011243145  |
| O | -2.117981154 | -3.535715252 | 0.709232052  |
| H | -2.597945189 | -4.330038312 | 0.518028035  |
| H | -1.500444110 | -3.733372268 | 1.407727102  |
| O | 5.064262363  | -0.786284059 | 3.364335241  |
| H | 4.163109301  | -1.062656074 | 3.243338234  |
| H | 5.588957401  | -1.574408114 | 3.429190247  |
| O | -0.061092005 | -3.428766249 | 2.902722211  |
| H | 0.428484031  | -2.730980196 | 2.581772188  |
| H | -0.320008024 | -3.201948233 | 3.784441270  |

Coord\_7

|   |              |              |              |
|---|--------------|--------------|--------------|
| C | -0.336616025 | -0.250124019 | -0.019054001 |
| N | 0.503224037  | -1.173066087 | 0.703739049  |
| C | 1.637406115  | -0.614009045 | 1.230512087  |
| C | 1.595396115  | 0.673418050  | -0.669518051 |
| N | 0.166773009  | 0.684148050  | -0.723054050 |
| N | 2.144527156  | 0.477339035  | 0.613744044  |
| H | 3.086565224  | 0.760319056  | 0.816379057  |
| N | -1.658307119 | -0.455588035 | 0.176901012  |
| H | -1.909753140 | -1.407903101 | 0.361171024  |
| H | -2.255670164 | -0.013891003 | -0.500939039 |
| H | 2.106503151  | 1.381925097  | -1.296855092 |
| O | 2.160386154  | -1.143202085 | 2.227951161  |
| O | -2.908129212 | 0.407663029  | -2.657730190 |
| H | -2.590946185 | -0.123249011 | -3.375434242 |
| H | -2.483657180 | 1.257398091  | -2.735842197 |
| O | -1.257869090 | 2.742789199  | -2.271845165 |
| H | -1.496630108 | 3.495553249  | -1.748056126 |
| H | -0.761721053 | 2.149289153  | -1.709891122 |
| O | 4.923171352  | 1.213935086  | 1.296434094  |
| H | 5.171903371  | 2.096735153  | 1.534903112  |
| H | 5.185737371  | 0.638748045  | 2.011061145  |
| O | -2.082059152 | -3.524427256 | 0.716896052  |
| H | -2.550094183 | -4.325304314 | 0.523384039  |
| H | -1.459381104 | -3.716069267 | 1.412523099  |
| O | 5.027480364  | -0.779888057 | 3.360030242  |
| H | 4.122429298  | -1.041120073 | 3.233221233  |
| H | 5.538886401  | -1.576519113 | 3.425994244  |
| O | -0.036464001 | -3.419383249 | 2.950411215  |
| H | 0.503005037  | -2.739855197 | 2.660511191  |

H -0.305132021 -3.201763233 3.831823277

Coord\_8

C -0.331954026 -0.253017016 -0.042057002  
N 0.521899035 -1.194423088 0.644041045  
C 1.636119119 -0.624431043 1.230395091  
C 1.609352117 0.624842044 -0.683794052  
N 0.175858014 0.680455049 -0.739754053  
N 2.137555156 0.472069033 0.617873045  
H 3.077707221 0.758472053 0.823716057  
N -1.648931120 -0.453257030 0.189583015  
H -1.900068138 -1.409872101 0.354012023  
H -2.259677163 0.007513999 -0.462851035  
H 2.142437155 1.296796094 -1.332596093  
O 2.115936154 -1.156020081 2.235751159  
O -2.918213208 0.423503029 -2.642667191  
H -2.606842188 -0.104365009 -3.365154244  
H -2.492931181 1.272941090 -2.719609198  
O -1.261919090 2.754023198 -2.258691163  
H -1.483843106 3.509773253 -1.731792122  
H -0.752825054 2.161098156 -1.707865124  
O 4.918390352 1.219725089 1.292639094  
H 5.157943373 2.103629153 1.536210111  
H 5.174234370 0.645334047 2.010358143  
O -2.039381145 -3.514402252 0.727738052  
H -2.493416177 -4.323264309 0.534004039  
H -1.410356102 -3.696829266 1.420150104  
O 4.987602360 -0.771412056 3.357104241  
H 4.079112293 -1.017903073 3.224173233  
H 5.485767393 -1.576079113 3.425710245  
O -0.011835002 -3.410001243 2.998101214  
H 0.577526042 -2.748730198 2.739250199  
H -0.290256023 -3.201577232 3.879206279

Coord\_9

C -0.329166024 -0.254445016 -0.066715006  
N 0.538829040 -1.213170086 0.580373042  
C 1.630337117 -0.636293048 1.228559090  
C 1.620905115 0.571869042 -0.698975051  
N 0.184354013 0.677669047 -0.757721055  
N 2.127904153 0.464095036 0.619634046  
H 3.066571220 0.752385054 0.828813060  
N -1.639982118 -0.453125033 0.200743014  
H -1.889818138 -1.414537100 0.343536023  
H -2.262208164 0.025940004 -0.426519032  
H 2.176971156 1.203981087 -1.368119101  
O 2.064531151 -1.173346085 2.239459163



|   |              |              |              |
|---|--------------|--------------|--------------|
| O | -2.929225212 | 0.446074031  | -2.627564187 |
| H | -2.625132188 | -0.078227008 | -3.355735243 |
| H | -2.502064182 | 1.294728095  | -2.702720194 |
| O | -1.263432092 | 2.769288199  | -2.244357164 |
| H | -1.466553107 | 3.527683252  | -1.713664124 |
| H | -0.741677052 | 2.175685155  | -1.706310121 |
| O | 4.910708355  | 1.222624086  | 1.287317095  |
| H | 5.140534368  | 2.108019154  | 1.534619113  |
| H | 5.159217373  | 0.650357045  | 2.009335143  |
| O | -1.984970145 | -3.505206252 | 0.744335051  |
| H | -2.420353172 | -4.325119313 | 0.554189039  |
| H | -1.348529096 | -3.671608266 | 1.434026106  |
| O | 4.942830356  | -0.762031056 | 3.355626243  |
| H | 4.031364291  | -0.994025071 | 3.215858234  |
| H | 5.427607390  | -1.574363113 | 3.428605247  |
| O | 0.012793003  | -3.400618242 | 3.045791218  |
| H | 0.652047047  | -2.757605199 | 2.817988202  |
| H | -0.275380020 | -3.201392232 | 3.926589281  |

Coord\_10

|   |              |              |              |
|---|--------------|--------------|--------------|
| C | -0.279066020 | -0.221724018 | -0.067443005 |
| N | 0.576741039  | -1.195788084 | 0.576110043  |
| C | 1.644928116  | -0.617284044 | 1.285418095  |
| C | 1.700646120  | 0.491885033  | -0.685399051 |
| N | 0.267707018  | 0.679219050  | -0.769785053 |
| N | 2.169191155  | 0.458764035  | 0.655589047  |
| H | 3.109632225  | 0.735103051  | 0.871959062  |
| N | -1.589551114 | -0.390287028 | 0.223329018  |
| H | -1.856962132 | -1.348902098 | 0.364873026  |
| H | -2.202189156 | 0.101146008  | -0.402471027 |
| H | 2.300010164  | 1.050128078  | -1.382207101 |
| O | 2.008146145  | -1.141668085 | 2.318607167  |
| O | -2.846417207 | 0.488158038  | -2.638677189 |
| H | -2.552359183 | -0.057574003 | -3.355138241 |
| H | -2.399043172 | 1.324826094  | -2.729082196 |
| O | -1.127765080 | 2.778486199  | -2.297183166 |
| H | -1.301762094 | 3.556863255  | -1.785377129 |
| H | -0.611774044 | 2.187477155  | -1.750850129 |
| O | 4.959872355  | 1.192614085  | 1.331232097  |
| H | 5.193482372  | 2.082156151  | 1.559083115  |
| H | 5.180235372  | 0.639821047  | 2.077220149  |
| O | -1.929670138 | -3.406028244 | 0.871079061  |
| H | -2.349978170 | -4.240188307 | 0.711322053  |
| H | -1.295928095 | -3.534091255 | 1.571384115  |
| O | 4.888650352  | -0.722688050 | 3.459663247  |
| H | 3.972543287  | -0.927002068 | 3.306458237  |
| H | 5.342839386  | -1.548621111 | 3.567457256  |

|   |              |              |             |
|---|--------------|--------------|-------------|
| O | 0.039307000  | -3.393977243 | 3.092942223 |
| H | 0.728402053  | -2.769150200 | 2.896238208 |
| H | -0.258807019 | -3.203881233 | 3.973354288 |

LIIC path connecting S<sub>1</sub>/T<sub>1</sub>/S<sub>0</sub>-III and S<sub>0</sub>-MIN

Coord\_1

|   |              |              |              |
|---|--------------|--------------|--------------|
| C | -0.279066020 | -0.221724018 | -0.067443005 |
| N | 0.576741039  | -1.195788084 | 0.576110043  |
| C | 1.644928116  | -0.617284044 | 1.285418095  |
| C | 1.700646120  | 0.491885033  | -0.685399051 |
| N | 0.267707018  | 0.679219050  | -0.769785053 |
| N | 2.169191155  | 0.458764035  | 0.655589047  |
| H | 3.109632225  | 0.735103051  | 0.871959062  |
| N | -1.589551114 | -0.390287028 | 0.223329018  |
| H | -1.856962132 | -1.348902098 | 0.364873026  |
| H | -2.202189156 | 0.101146008  | -0.402471027 |
| H | 2.300010164  | 1.050128078  | -1.382207101 |
| O | 2.008146145  | -1.141668085 | 2.318607167  |
| O | -2.846417207 | 0.488158038  | -2.638677189 |
| H | -2.552359183 | -0.057574003 | -3.355138241 |
| H | -2.399043172 | 1.324826094  | -2.729082196 |
| O | -1.127765080 | 2.778486199  | -2.297183166 |
| H | -1.301762094 | 3.556863255  | -1.785377129 |
| H | -0.611774044 | 2.187477155  | -1.750850129 |
| O | 4.959872355  | 1.192614085  | 1.331232097  |
| H | 5.193482372  | 2.082156151  | 1.559083115  |
| H | 5.180235372  | 0.639821047  | 2.077220149  |
| O | -1.929670138 | -3.406028244 | 0.871079061  |
| H | -2.349978170 | -4.240188307 | 0.711322053  |
| H | -1.295928095 | -3.534091255 | 1.571384115  |
| O | 4.888650352  | -0.722688050 | 3.459663247  |
| H | 3.972543287  | -0.927002068 | 3.306458237  |
| H | 5.342839386  | -1.548621111 | 3.567457256  |
| O | 0.039307000  | -3.393977243 | 3.092942223  |
| H | 0.728402053  | -2.769150200 | 2.896238208  |
| H | -0.258807019 | -3.203881233 | 3.973354288  |

Coord\_2

|   |              |              |              |
|---|--------------|--------------|--------------|
| C | -0.286653019 | -0.233602016 | -0.044906003 |
| N | 0.551740039  | -1.181877084 | 0.636250048  |
| C | 1.659742121  | -0.621718046 | 1.282280095  |
| C | 1.678558119  | 0.578130039  | -0.662585045 |
| N | 0.254175020  | 0.684691049  | -0.753220053 |
| N | 2.188556158  | 0.452629035  | 0.647157047  |
| H | 3.130468224  | 0.728270050  | 0.858604062  |
| N | -1.601105117 | -0.400440029 | 0.200290017  |
| H | -1.872878132 | -1.351434100 | 0.374350024  |

|   |              |              |              |
|---|--------------|--------------|--------------|
| H | -2.205319160 | 0.075358005  | -0.446481032 |
| H | 2.257576165  | 1.174865083  | -1.345446099 |
| O | 2.076830151  | -1.141620083 | 2.295906166  |
| O | -2.825548202 | 0.463804036  | -2.667541194 |
| H | -2.544363182 | -0.079736005 | -3.390629244 |
| H | -2.387550172 | 1.304402096  | -2.766967201 |
| O | -1.130734082 | 2.771945198  | -2.321363169 |
| H | -1.332250096 | 3.548046257  | -1.816215129 |
| H | -0.631775044 | 2.184879160  | -1.755679125 |
| O | 4.973795358  | 1.181709086  | 1.327786094  |
| H | 5.218595378  | 2.066160149  | 1.563517112  |
| H | 5.192904373  | 0.618661042  | 2.066759151  |
| O | -1.951019138 | -3.411805245 | 0.885642061  |
| H | -2.418353173 | -4.224713307 | 0.748915054  |
| H | -1.325133096 | -3.556694257 | 1.590102114  |
| O | 4.906424353  | -0.748035053 | 3.437055250  |
| H | 3.991792289  | -0.952285067 | 3.272552236  |
| H | 5.361215388  | -1.574070113 | 3.540329254  |
| O | 0.039074004  | -3.394261247 | 3.092885220  |
| H | 0.728403053  | -2.769020197 | 2.896463208  |
| H | -0.258575017 | -3.203730232 | 3.973189285  |

Coord\_3

|   |              |              |              |
|---|--------------|--------------|--------------|
| C | -0.292512022 | -0.245048019 | -0.017960001 |
| N | 0.527961036  | -1.164596086 | 0.699461048  |
| C | 1.671751121  | -0.625532044 | 1.283792092  |
| C | 1.654077120  | 0.655475046  | -0.632092048 |
| N | 0.243672015  | 0.690205050  | -0.732085053 |
| N | 2.204320158  | 0.445686033  | 0.639693044  |
| H | 3.147807225  | 0.721181054  | 0.845269060  |
| N | -1.610564118 | -0.413973028 | 0.176042015  |
| H | -1.887254137 | -1.356930098 | 0.379304028  |
| H | -2.201263159 | 0.045270002  | -0.495366035 |
| H | 2.214203157  | 1.286488091  | -1.300656092 |
| O | 2.138494154  | -1.143481083 | 2.275207165  |
| O | -2.801159201 | 0.443864034  | -2.691574192 |
| H | -2.534596184 | -0.097527007 | -3.421648244 |
| H | -2.371254170 | 1.287564094  | -2.799574204 |
| O | -1.127380082 | 2.767238198  | -2.339924167 |
| H | -1.354992097 | 3.540394253  | -1.841374131 |
| H | -0.646428047 | 2.182800155  | -1.756649128 |
| O | 4.983835359  | 1.173736083  | 1.322614096  |
| H | 5.238764376  | 2.053760150  | 1.564018110  |
| H | 5.202778376  | 0.602382042  | 2.055588151  |
| O | -1.973435140 | -3.420908248 | 0.893692064  |
| H | -2.485851181 | -4.210182301 | 0.782674054  |
| H | -1.356937099 | -3.578224256 | 1.604085115  |

|   |              |              |             |
|---|--------------|--------------|-------------|
| O | 4.924088353  | -0.766024053 | 3.416689244 |
| H | 4.011239289  | -0.971731072 | 3.241816235 |
| H | 5.380732387  | -1.591282116 | 3.516877251 |
| O | 0.038841002  | -3.394544245 | 3.092828222 |
| H | 0.728404053  | -2.768890200 | 2.896688209 |
| H | -0.258343021 | -3.203577231 | 3.973022288 |

Coord\_4

|   |              |              |              |
|---|--------------|--------------|--------------|
| C | -0.296714023 | -0.255564020 | 0.012906003  |
| N | 0.505059038  | -1.143531085 | 0.764979054  |
| C | 1.681112118  | -0.628593043 | 1.289525092  |
| C | 1.628110117  | 0.724558051  | -0.595549041 |
| N | 0.235875017  | 0.695975050  | -0.707373052 |
| N | 2.216749161  | 0.438051032  | 0.632998047  |
| H | 3.161894230  | 0.713831052  | 0.831956061  |
| N | -1.617311117 | -0.430235031 | 0.151624009  |
| H | -1.899832135 | -1.364773097 | 0.381315029  |
| H | -2.189979158 | 0.011533000  | -0.546905041 |
| H | 2.171022156  | 1.385883099  | -1.249796089 |
| O | 2.192905159  | -1.147140084 | 2.256754162  |
| O | -2.773993199 | 0.427569031  | -2.711004194 |
| H | -2.523867179 | -0.111798007 | -3.448272247 |
| H | -2.351055167 | 1.273637091  | -2.827438201 |
| O | -1.118657082 | 2.764024198  | -2.354083167 |
| H | -1.370921099 | 3.533798255  | -1.862190133 |
| H | -0.656385046 | 2.181154159  | -1.754886126 |
| O | 4.990105358  | 1.168678085  | 1.316309097  |
| H | 5.253986377  | 2.044935146  | 1.561650111  |
| H | 5.209905378  | 0.590615045  | 2.044134146  |
| O | -1.996886143 | -3.432986247 | 0.895616063  |
| H | -2.552408185 | -4.196074303 | 0.812572060  |
| H | -1.390460102 | -3.598542260 | 1.613079118  |
| O | 4.941549355  | -0.777709054 | 3.398298245  |
| H | 4.030839289  | -0.986456069 | 3.213704234  |
| H | 5.401355388  | -1.601316116 | 3.496536249  |
| O | 0.038608005  | -3.394827244 | 3.092770225  |
| H | 0.728404053  | -2.768759202 | 2.896912210  |
| H | -0.258111019 | -3.203425230 | 3.972855285  |

Coord\_5

|   |              |              |              |
|---|--------------|--------------|--------------|
| C | -0.299276024 | -0.264769021 | 0.047283003  |
| N | 0.482798033  | -1.118333083 | 0.832106062  |
| C | 1.688023120  | -0.630780043 | 1.299067095  |
| C | 1.601410114  | 0.786113055  | -0.554380040 |
| N | 0.230548017  | 0.702143050  | -0.679933047 |
| N | 2.226090161  | 0.429821030  | 0.626885044  |
| H | 3.172947230  | 0.706219049  | 0.818665060  |

|   |              |              |              |
|---|--------------|--------------|--------------|
| N | -1.620863119 | -0.448631032 | 0.128008008  |
| H | -1.910335139 | -1.374386099 | 0.381804026  |
| H | -2.171450155 | -0.025229002 | -0.599098042 |
| H | 2.128937155  | 1.474072107  | -1.194548085 |
| O | 2.239973163  | -1.152476086 | 2.240813163  |
| O | -2.744694200 | 0.414199029  | -2.726086195 |
| H | -2.512884179 | -0.123291007 | -3.470637251 |
| H | -2.327754170 | 1.261986089  | -2.851031204 |
| O | -1.105410082 | 2.761946198  | -2.364835170 |
| H | -1.380867097 | 3.528067254  | -1.879698137 |
| H | -0.662199048 | 2.179803159  | -1.751319128 |
| O | 4.992681361  | 1.166486085  | 1.309425094  |
| H | 5.264235381  | 2.039611146  | 1.557397114  |
| H | 5.214292373  | 0.583000042  | 2.032781146  |
| O | -2.021326146 | -3.447683246 | 0.891679064  |
| H | -2.617842190 | -4.181945302 | 0.838633061  |
| H | -1.424887103 | -3.617428263 | 1.616766118  |
| O | 4.958637356  | -0.784032055 | 3.381620245  |
| H | 4.050482290  | -0.997427072 | 3.187690229  |
| H | 5.422949392  | -1.605114116 | 3.478779251  |
| O | 0.038375003  | -3.395110243 | 3.092713222  |
| H | 0.728405054  | -2.768629199 | 2.897137211  |
| H | -0.257878017 | -3.203273229 | 3.972688287  |

Coord\_6

|   |              |              |              |
|---|--------------|--------------|--------------|
| C | -0.300153024 | -0.272374018 | 0.084870008  |
| N | 0.461077032  | -1.088721080 | 0.900239067  |
| C | 1.692741122  | -0.631964045 | 1.312040092  |
| C | 1.574595115  | 0.840921059  | -0.509795037 |
| N | 0.227530019  | 0.708779049  | -0.650461044 |
| N | 2.232588161  | 0.421088028  | 0.621178042  |
| H | 3.181183228  | 0.698365053  | 0.805395057  |
| N | -1.620856118 | -0.468622036 | 0.106108008  |
| H | -1.918488136 | -1.385230100 | 0.382086030  |
| H | -2.145735157 | -0.064444004 | -0.650150047 |
| H | 2.088640149  | 1.552142114  | -1.136335084 |
| O | 2.279783162  | -1.159281083 | 2.227667162  |
| O | -2.713837197 | 0.403091027  | -2.737125198 |
| H | -2.502293178 | -0.132628011 | -3.488955251 |
| H | -2.302080167 | 1.252021089  | -2.870790206 |
| O | -1.088394081 | 2.760630198  | -2.372986172 |
| H | -1.385567101 | 3.522936251  | -1.894651135 |
| H | -0.664328049 | 2.178546157  | -1.746718127 |
| O | 4.991635357  | 1.167087082  | 1.302457094  |
| H | 5.269495382  | 2.037685148  | 1.552149109  |
| H | 5.215925377  | 0.579199041  | 2.021866145  |
| O | -2.046737148 | -3.464640249 | 0.881989061  |

|   |              |              |             |
|---|--------------|--------------|-------------|
| H | -2.681876193 | -4.167449301 | 0.860845064 |
| H | -1.459503106 | -3.634558260 | 1.614747116 |
| O | 4.975138357  | -0.785813059 | 3.366413241 |
| H | 4.070023293  | -1.005455072 | 3.163286226 |
| H | 5.445315391  | -1.603490114 | 3.463136248 |
| O | 0.038142001  | -3.395393247 | 3.092656224 |
| H | 0.728405054  | -2.768498201 | 2.897361206 |
| H | -0.257645020 | -3.203120228 | 3.972520284 |

Coord\_7

|   |              |              |              |
|---|--------------|--------------|--------------|
| C | -0.299247020 | -0.278178018 | 0.125528009  |
| N | 0.439937031  | -1.054488075 | 0.968964067  |
| C | 1.695593123  | -0.631957044 | 1.328127096  |
| C | 1.548147111  | 0.889780063  | -0.462791032 |
| N | 0.226725019  | 0.715887054  | -0.619488046 |
| N | 2.236491161  | 0.411967028  | 0.615728046  |
| H | 3.186814229  | 0.690313050  | 0.792140056  |
| N | -1.617000115 | -0.489718036 | 0.086782005  |
| H | -1.924003137 | -1.396790099 | 0.383406025  |
| H | -2.112932152 | -0.105615005 | -0.698476048 |
| H | 2.050616149  | 1.621185118  | -1.076339079 |
| O | 2.312648165  | -1.167165083 | 2.217627161  |
| O | -2.681975191 | 0.393632026  | -2.744514200 |
| H | -2.492739179 | -0.140295012 | -3.503575254 |
| H | -2.274733166 | 1.243205091  | -2.887142206 |
| O | -1.068303078 | 2.759664201  | -2.379163173 |
| H | -1.385674101 | 3.518050252  | -1.907525140 |
| H | -0.663142047 | 2.177093158  | -1.741716127 |
| O | 4.987037357  | 1.170413083  | 1.295821095  |
| H | 5.269771380  | 2.039051145  | 1.546670114  |
| H | 5.214787376  | 0.578922043  | 2.011661147  |
| O | -2.073141150 | -3.483458253 | 0.866468065  |
| H | -2.744145200 | -4.152340301 | 0.879066066  |
| H | -1.493711108 | -3.649442264 | 1.606515118  |
| O | 4.990823361  | -0.783725058 | 3.352456239  |
| H | 4.089307295  | -1.011167075 | 3.140050227  |
| H | 5.468207392  | -1.597105114 | 3.449195248  |
| O | 0.037909004  | -3.395676246 | 3.092599221  |
| H | 0.728405054  | -2.768368198 | 2.897586207  |
| H | -0.257412018 | -3.202968233 | 3.972352286  |

Coord\_8

|   |              |              |              |
|---|--------------|--------------|--------------|
| C | -0.296417022 | -0.282057019 | 0.169380012  |
| N | 0.419584032  | -1.015492072 | 1.038213075  |
| C | 1.696995120  | -0.630435046 | 1.347129095  |
| C | 1.522418111  | 0.933471070  | -0.414138031 |
| N | 0.228072018  | 0.723380050  | -0.587332040 |

|   |              |              |              |
|---|--------------|--------------|--------------|
| N | 2.238034162  | 0.402643031  | 0.610426044  |
| H | 3.190045232  | 0.682164048  | 0.778894056  |
| N | -1.608998118 | -0.511446038 | 0.070840006  |
| H | -1.926524137 | -1.408532103 | 0.386976030  |
| H | -2.073081147 | -0.148310010 | -0.742707053 |
| H | 2.015132142  | 1.682238123  | -1.015537073 |
| O | 2.339213170  | -1.175391085 | 2.211052161  |
| O | -2.649706190 | 0.385248028  | -2.748803198 |
| H | -2.484963179 | -0.146617013 | -3.515072254 |
| H | -2.246453161 | 1.235044088  | -2.900542207 |
| O | -1.045821078 | 2.758564200  | -2.383820171 |
| H | -1.381771101 | 3.512922254  | -1.918474140 |
| H | -0.658923049 | 2.175013158  | -1.736843124 |
| O | 4.978958361  | 1.176434083  | 1.289808091  |
| H | 5.265100380  | 2.043640149  | 1.541543111  |
| H | 5.210869374  | 0.581969040  | 2.002338145  |
| O | -2.100563153 | -3.503622250 | 0.844782063  |
| H | -2.804153201 | -4.136463295 | 0.892854065  |
| H | -1.527029108 | -3.661326262 | 1.591401112  |
| O | 5.005469363  | -0.778236056 | 3.339534238  |
| H | 4.108184296  | -1.014957074 | 3.117586224  |
| H | 5.491361395  | -1.586418115 | 3.436599247  |
| O | 0.037676002  | -3.395959244 | 3.092542223  |
| H | 0.728405054  | -2.768238200 | 2.897811208  |
| H | -0.257179021 | -3.202815232 | 3.972184288  |

Coord\_9

|   |              |              |              |
|---|--------------|--------------|--------------|
| C | -0.291481021 | -0.283963021 | 0.216994015  |
| N | 0.400406030  | -0.971635068 | 1.108549082  |
| C | 1.697473120  | -0.626792047 | 1.369077097  |
| C | 1.497601106  | 0.972739070  | -0.364370027 |
| N | 0.231510019  | 0.731048051  | -0.554018041 |
| N | 2.237414162  | 0.393434029  | 0.605237043  |
| H | 3.191035228  | 0.674113050  | 0.765640055  |
| N | -1.596404113 | -0.533277039 | 0.059072003  |
| H | -1.925521140 | -1.419806102 | 0.394044028  |
| H | -2.025941143 | -0.192112016 | -0.781673057 |
| H | 1.982201141  | 1.736226125  | -0.954773068 |
| O | 2.360619168  | -1.182615085 | 2.208391161  |
| O | -2.617795188 | 0.377372029  | -2.750822199 |
| H | -2.479995178 | -0.151682012 | -3.524430256 |
| H | -2.218159159 | 1.227092088  | -2.911528207 |
| O | -1.021695072 | 2.756694199  | -2.387221172 |
| H | -1.374354100 | 3.506848252  | -1.927203141 |
| H | -0.651832047 | 2.171626159  | -1.732581125 |
| O | 4.967453359  | 1.185231083  | 1.284512090  |
| H | 5.255532379  | 2.051499145  | 1.537074109  |

|   |              |              |             |
|---|--------------|--------------|-------------|
| H | 5.204161375  | 0.588324041  | 1.993901144 |
| O | -2.128917152 | -3.524382254 | 0.816211059 |
| H | -2.861176204 | -4.119726297 | 0.901192067 |
| H | -1.559040114 | -3.669050265 | 1.568456114 |
| O | 5.018882360  | -0.769497053 | 3.327411237 |
| H | 4.126525299  | -1.016874071 | 3.095538224 |
| H | 5.514513397  | -1.571567115 | 3.425023246 |
| O | 0.037443005  | -3.396241243 | 3.092485220 |
| H | 0.728405054  | -2.768108197 | 2.898037209 |
| H | -0.256946019 | -3.202662231 | 3.972016285 |

#### Coord\_10

|   |              |              |              |
|---|--------------|--------------|--------------|
| C | -0.357476028 | -0.325875023 | 0.229680018  |
| N | 0.341885027  | -0.973917071 | 1.110492078  |
| C | 1.653274120  | -0.646333049 | 1.306678092  |
| C | 1.358668096  | 1.022653073  | -0.350634025 |
| N | 0.124605007  | 0.729787053  | -0.539943037 |
| N | 2.151526155  | 0.392262029  | 0.530966037  |
| H | 3.102758223  | 0.691790052  | 0.672735046  |
| N | -1.649147119 | -0.620508046 | 0.029419001  |
| H | -1.963775141 | -1.512845109 | 0.364878027  |
| H | -2.065503149 | -0.287993023 | -0.820383060 |
| H | 1.807123128  | 1.824952131  | -0.918745067 |
| O | 2.363013171  | -1.219113085 | 2.093251151  |
| O | -2.733839197 | 0.356619025  | -2.728166195 |
| H | -2.629401188 | -0.143525009 | -3.525973252 |
| H | -2.360519169 | 1.219526087  | -2.880668210 |
| O | -1.191319087 | 2.765921198  | -2.329191167 |
| H | -1.566105111 | 3.489871251  | -1.844840131 |
| H | -0.810044059 | 2.169065158  | -1.692877120 |
| O | 4.862872351  | 1.248671090  | 1.181207087  |
| H | 5.136525369  | 2.113660152  | 1.453307107  |
| H | 5.132414370  | 0.636409044  | 1.865785136  |
| O | -2.145668152 | -3.642177264 | 0.683196049  |
| H | -2.886480206 | -4.220391304 | 0.804450057  |
| H | -1.559679111 | -3.776041274 | 1.425256104  |
| O | 5.025804364  | -0.758670055 | 3.159791227  |
| H | 4.140683299  | -1.031827075 | 2.927287212  |
| H | 5.552154399  | -1.544063112 | 3.226183233  |
| O | -0.264665017 | -3.327435241 | 2.832781203  |
| H | -0.002365999 | -2.522987184 | 2.391665171  |
| H | 0.533658036  | -3.727547270 | 3.149010225  |

#### Relaxation pathway III

LIIC path connecting S1-MIN and S<sub>1</sub>/T<sub>1</sub>

#### Coord\_1

|   |              |              |             |
|---|--------------|--------------|-------------|
| C | -0.528514036 | -0.198852015 | 0.053044002 |
|---|--------------|--------------|-------------|



|   |              |              |              |
|---|--------------|--------------|--------------|
| N | 0.272746019  | -0.910152065 | 0.884654066  |
| C | 1.562816111  | -0.642046047 | 1.248051090  |
| C | 1.456630102  | 0.873824062  | -0.582809040 |
| N | 0.070876006  | 0.748146053  | -0.594151045 |
| N | 2.110098154  | 0.394877027  | 0.566599039  |
| H | 3.079049219  | 0.607218045  | 0.725546052  |
| N | -1.853804134 | -0.459780034 | 0.017630000  |
| H | -2.085728150 | -1.385158100 | 0.332370023  |
| H | -2.292495164 | -0.199327015 | -0.848195061 |
| H | 1.847113132  | 1.792133130  | -0.988200073 |
| O | 2.132379151  | -1.281374091 | 2.107923151  |
| O | -2.789862203 | 0.433758029  | -2.797952202 |
| H | -2.500767179 | -0.039636000 | -3.565975258 |
| H | -2.439824174 | 1.317267093  | -2.865880208 |
| O | -1.341935098 | 2.902234209  | -2.304437165 |
| H | -1.692337122 | 3.660765265  | -1.855336134 |
| H | -0.901531063 | 2.370124170  | -1.651441118 |
| O | 4.913998355  | 1.132336081  | 1.249375092  |
| H | 5.124980367  | 2.000144144  | 1.565857113  |
| H | 5.128620371  | 0.515414037  | 1.946282139  |
| O | -1.803395127 | -3.468521251 | 0.881142065  |
| H | -2.442738174 | -4.155033300 | 1.014047074  |
| H | -1.175779083 | -3.528008256 | 1.597332115  |
| O | 4.875443353  | -0.958641068 | 3.189077229  |
| H | 3.977989288  | -1.155925083 | 2.933095212  |
| H | 5.358459386  | -1.774142130 | 3.157625225  |
| O | 0.244686019  | -3.374689245 | 3.029956218  |
| H | 0.891092063  | -2.702802195 | 2.833502202  |
| H | 0.717654050  | -4.099522294 | 3.415423246  |

Coord\_2

|   |              |              |              |
|---|--------------|--------------|--------------|
| C | -0.529093036 | -0.199794014 | 0.054078004  |
| N | 0.271601022  | -0.909292067 | 0.886833065  |
| C | 1.561858115  | -0.641036048 | 1.248804088  |
| C | 1.456410107  | 0.872311065  | -0.583106041 |
| N | 0.070081007  | 0.748952054  | -0.591510043 |
| N | 2.108810152  | 0.397500026  | 0.568403042  |
| H | 3.078572219  | 0.607632041  | 0.725400052  |
| N | -1.854223131 | -0.460793033 | 0.017414001  |
| H | -2.086601149 | -1.385627099 | 0.333441025  |
| H | -2.292230163 | -0.201196016 | -0.848993060 |
| H | 1.848012136  | 1.787995128  | -0.993335072 |
| O | 2.132698155  | -1.280538091 | 2.107663150  |
| O | -2.787034201 | 0.433387033  | -2.798718201 |
| H | -2.498287179 | -0.039263005 | -3.567346256 |
| H | -2.437559174 | 1.317145097  | -2.866207208 |
| O | -1.342603094 | 2.904379208  | -2.303834168 |

|   |              |              |              |
|---|--------------|--------------|--------------|
| H | -1.694903123 | 3.663960263  | -1.857969135 |
| H | -0.902857065 | 2.375043169  | -1.648186117 |
| O | 4.914530353  | 1.131518084  | 1.248808089  |
| H | 5.124742369  | 1.999309145  | 1.565847111  |
| H | 5.128787368  | 0.514482039  | 1.945728138  |
| O | -1.803927130 | -3.469379248 | 0.881876066  |
| H | -2.441591177 | -4.157555300 | 1.014337074  |
| H | -1.175598083 | -3.528460253 | 1.597485116  |
| O | 4.875328352  | -0.959327067 | 3.188790230  |
| H | 3.977802287  | -1.156105083 | 2.932665214  |
| H | 5.358006384  | -1.775011129 | 3.156914228  |
| O | 0.245394016  | -3.374916241 | 3.029182217  |
| H | 0.891171064  | -2.702472195 | 2.832499205  |
| H | 0.718630049  | -4.098221296 | 3.417196244  |

Coord\_3

|   |              |              |              |
|---|--------------|--------------|--------------|
| C | -0.529671040 | -0.200745014 | 0.055111006  |
| N | 0.270454020  | -0.908442065 | 0.889008063  |
| C | 1.560898113  | -0.640038046 | 1.249557091  |
| C | 1.456187107  | 0.870759062  | -0.583395041 |
| N | 0.069294004  | 0.749742052  | -0.588862045 |
| N | 2.107518150  | 0.400110029  | 0.570207039  |
| H | 3.078082222  | 0.608027046  | 0.725250051  |
| N | -1.854639133 | -0.461812033 | 0.017196001  |
| H | -2.087473149 | -1.386098099 | 0.334508026  |
| H | -2.291958165 | -0.203069012 | -0.849793060 |
| H | 1.848905133  | 1.783786126  | -0.998458074 |
| O | 2.133009153  | -1.279715093 | 2.107402149  |
| O | -2.784195202 | 0.433028029  | -2.799475200 |
| H | -2.495797178 | -0.038871001 | -3.568710258 |
| H | -2.435281177 | 1.317034096  | -2.866518206 |
| O | -1.343252099 | 2.906515211  | -2.303196165 |
| H | -1.697432125 | 3.667133263  | -1.860567136 |
| H | -0.904186067 | 2.379945170  | -1.644910119 |
| O | 4.915045354  | 1.130713084  | 1.248216088  |
| H | 5.124478368  | 1.998493143  | 1.565797114  |
| H | 5.128949371  | 0.513576035  | 1.945155140  |
| O | -1.804466129 | -3.470224249 | 0.882590063  |
| H | -2.440456176 | -4.160051297 | 1.014600075  |
| H | -1.175431085 | -3.528901254 | 1.597623115  |
| O | 4.875237350  | -0.959971070 | 3.188507231  |
| H | 3.977639285  | -1.156257083 | 2.932248211  |
| H | 5.357586386  | -1.775833126 | 3.156216227  |
| O | 0.246078020  | -3.375142242 | 3.028401220  |
| H | 0.891233062  | -2.702149196 | 2.831489201  |
| H | 0.719569053  | -4.096915297 | 3.418960246  |

## Coord\_4

|   |              |              |              |
|---|--------------|--------------|--------------|
| C | -0.530246039 | -0.201705016 | 0.056144002  |
| N | 0.269306017  | -0.907604066 | 0.891180065  |
| C | 1.559937111  | -0.639051046 | 1.250310090  |
| C | 1.455962106  | 0.869168065  | -0.583675044 |
| N | 0.068515007  | 0.750516053  | -0.586210041 |
| N | 2.106222153  | 0.402707030  | 0.572011041  |
| H | 3.077580223  | 0.608405042  | 0.725098050  |
| N | -1.855053135 | -0.462835033 | 0.016976001  |
| H | -2.088345148 | -1.386572099 | 0.335572027  |
| H | -2.291679167 | -0.204948015 | -0.850596060 |
| H | 1.849793135  | 1.779506130  | -1.003568074 |
| O | 2.133312154  | -1.278907093 | 2.107140154  |
| O | -2.781347202 | 0.432683032  | -2.800226203 |
| H | -2.493297181 | -0.038459004 | -3.570068259 |
| H | -2.432990173 | 1.316936093  | -2.866812206 |
| O | -1.343881095 | 2.908643207  | -2.302523168 |
| H | -1.699926121 | 3.670286265  | -1.863129132 |
| H | -0.905520065 | 2.384831170  | -1.641614117 |
| O | 4.915545352  | 1.129921080  | 1.247598088  |
| H | 5.124189368  | 1.997697144  | 1.565706112  |
| H | 5.129109367  | 0.512696039  | 1.944564139  |
| O | -1.805011129 | -3.471058248 | 0.883283063  |
| H | -2.439334177 | -4.162521301 | 1.014839073  |
| H | -1.175279085 | -3.529333253 | 1.597746117  |
| O | 4.875171351  | -0.960574068 | 3.188229228  |
| H | 3.977502286  | -1.156383086 | 2.931847211  |
| H | 5.357201383  | -1.776608127 | 3.155531228  |
| O | 0.246738015  | -3.375369243 | 3.027614217  |
| H | 0.891279064  | -2.701835192 | 2.830473202  |
| H | 0.720474052  | -4.095606293 | 3.420719247  |

## Coord\_5

|   |              |              |              |
|---|--------------|--------------|--------------|
| C | -0.530820037 | -0.202673013 | 0.057175003  |
| N | 0.268156020  | -0.906776067 | 0.893348062  |
| C | 1.558974115  | -0.638075048 | 1.251062087  |
| C | 1.455734105  | 0.867538061  | -0.583947041 |
| N | 0.067744007  | 0.751273052  | -0.583552042 |
| N | 2.104921149  | 0.405291029  | 0.573814043  |
| H | 3.077065223  | 0.608765042  | 0.724943054  |
| N | -1.855464131 | -0.463864034 | 0.016755001  |
| H | -2.089217148 | -1.387047099 | 0.336633022  |
| H | -2.291394163 | -0.206831013 | -0.851402060 |
| H | 1.850675136  | 1.775155128  | -1.008666072 |
| O | 2.133607155  | -1.278112094 | 2.106877153  |
| O | -2.778488200 | 0.432350031  | -2.800970200 |
| H | -2.490786182 | -0.038028005 | -3.571422260 |

|   |              |              |              |
|---|--------------|--------------|--------------|
| H | -2.430686172 | 1.316850096  | -2.867092204 |
| O | -1.344491098 | 2.910764208  | -2.301815166 |
| H | -1.702382123 | 3.673419264  | -1.865655133 |
| H | -0.906857063 | 2.389700172  | -1.638298118 |
| O | 4.916028353  | 1.129141083  | 1.246954090  |
| H | 5.123875371  | 1.996920142  | 1.565575114  |
| H | 5.129266369  | 0.511843037  | 1.943955141  |
| O | -1.805564130 | -3.471879251 | 0.883958066  |
| H | -2.438225175 | -4.164967301 | 1.015052072  |
| H | -1.175141086 | -3.529756256 | 1.597854117  |
| O | 4.875129350  | -0.961136070 | 3.187956231  |
| H | 3.977391286  | -1.156483084 | 2.931460214  |
| H | 5.356850385  | -1.777336127 | 3.154860226  |
| O | 0.247375018  | -3.375597245 | 3.026822219  |
| H | 0.891307063  | -2.701528196 | 2.829451202  |
| H | 0.721343051  | -4.094293293 | 3.422471247  |

Coord\_6

|   |              |              |              |
|---|--------------|--------------|--------------|
| C | -0.531393036 | -0.203650017 | 0.058205005  |
| N | 0.267004017  | -0.905960065 | 0.895513064  |
| C | 1.558008112  | -0.637111045 | 1.251815091  |
| C | 1.455503103  | 0.865869062  | -0.584211043 |
| N | 0.066980007  | 0.752014053  | -0.580888042 |
| N | 2.103616151  | 0.407862031  | 0.575617040  |
| H | 3.076538220  | 0.609107044  | 0.724785053  |
| N | -1.855873133 | -0.464898036 | 0.016530000  |
| H | -2.090089153 | -1.387525099 | 0.337688027  |
| H | -2.291102163 | -0.208719017 | -0.852211061 |
| H | 1.851552136  | 1.770733128  | -1.013751074 |
| O | 2.133894154  | -1.277331092 | 2.106614152  |
| O | -2.775620202 | 0.432031033  | -2.801707201 |
| H | -2.488264181 | -0.037578004 | -3.572771259 |
| H | -2.428368175 | 1.316777096  | -2.867355205 |
| O | -1.345082099 | 2.912877207  | -2.301072164 |
| H | -1.704802124 | 3.676533266  | -1.868145134 |
| H | -0.908198067 | 2.394552172  | -1.634960115 |
| O | 4.916496352  | 1.128375083  | 1.246285088  |
| H | 5.123536369  | 1.996162144  | 1.565403110  |
| H | 5.129420370  | 0.511015039  | 1.943327140  |
| O | -1.806123131 | -3.472689252 | 0.884613066  |
| H | -2.437130175 | -4.167389297 | 1.015242073  |
| H | -1.175016084 | -3.530169252 | 1.597948114  |
| O | 4.875112353  | -0.961658072 | 3.187689229  |
| H | 3.977305284  | -1.156557085 | 2.931087212  |
| H | 5.356534387  | -1.778017125 | 3.154202226  |
| O | 0.247990017  | -3.375824240 | 3.026025220  |
| H | 0.891320064  | -2.701230195 | 2.828424201  |

|   |             |              |             |
|---|-------------|--------------|-------------|
| H | 0.722179050 | -4.092976292 | 3.424218246 |
|---|-------------|--------------|-------------|

Coord\_7

|   |              |              |              |
|---|--------------|--------------|--------------|
| C | -0.531964039 | -0.204635017 | 0.059234006  |
| N | 0.265849019  | -0.905154065 | 0.897674065  |
| C | 1.557041110  | -0.636158045 | 1.252568089  |
| C | 1.455268106  | 0.864160063  | -0.584465042 |
| N | 0.066224003  | 0.752739052  | -0.578219042 |
| N | 2.102306151  | 0.410420032  | 0.577419042  |
| H | 3.075997221  | 0.609432043  | 0.724625051  |
| N | -1.856280133 | -0.465937033 | 0.016303004  |
| H | -2.090963152 | -1.388006100 | 0.338740026  |
| H | -2.290804167 | -0.210612016 | -0.853023062 |
| H | 1.852423135  | 1.766239127  | -1.018823074 |
| O | 2.134173152  | -1.276563091 | 2.106349150  |
| O | -2.772741197 | 0.431725030  | -2.802439201 |
| H | -2.485731179 | -0.037107004 | -3.574115258 |
| H | -2.426037176 | 1.316717093  | -2.867604204 |
| O | -1.345652097 | 2.914983211  | -2.300294168 |
| H | -1.707185121 | 3.679627264  | -1.870598135 |
| H | -0.909542066 | 2.399388174  | -1.631602115 |
| O | 4.916947354  | 1.127621080  | 1.245589088  |
| H | 5.123172369  | 1.995424142  | 1.565191111  |
| H | 5.129571371  | 0.510213039  | 1.942681141  |
| O | -1.806688129 | -3.473489252 | 0.885249063  |
| H | -2.436046177 | -4.169787301 | 1.015407076  |
| H | -1.174906083 | -3.530574253 | 1.598029115  |
| O | 4.875121349  | -0.962138067 | 3.187425228  |
| H | 3.977245286  | -1.156604081 | 2.930728213  |
| H | 5.356251383  | -1.778652128 | 3.153557228  |
| O | 0.248582018  | -3.376053242 | 3.025223220  |
| H | 0.891316064  | -2.700939195 | 2.827392205  |
| H | 0.722980050  | -4.091654296 | 3.425959244  |

Coord\_8

|   |              |              |              |
|---|--------------|--------------|--------------|
| C | -0.532534037 | -0.205629013 | 0.060262007  |
| N | 0.264692020  | -0.904359066 | 0.899831066  |
| C | 1.556070112  | -0.635217046 | 1.253320092  |
| C | 1.455030103  | 0.862412064  | -0.584711041 |
| N | 0.065474006  | 0.753448055  | -0.575545040 |
| N | 2.100992151  | 0.412966030  | 0.579221044  |
| H | 3.075444221  | 0.609739045  | 0.724461053  |
| N | -1.856685134 | -0.466982036 | 0.016072002  |
| H | -2.091837152 | -1.388489102 | 0.339786024  |
| H | -2.290500166 | -0.212510016 | -0.853840059 |
| H | 1.853288133  | 1.761673126  | -1.023883072 |
| O | 2.134444155  | -1.275808093 | 2.106084154  |

|   |              |              |              |
|---|--------------|--------------|--------------|
| O | -2.769851202 | 0.431433030  | -2.803164201 |
| H | -2.483187181 | -0.036615002 | -3.575456257 |
| H | -2.423691174 | 1.316669096  | -2.867837206 |
| O | -1.346202098 | 2.917082208  | -2.299480166 |
| H | -1.709530122 | 3.682703266  | -1.873013136 |
| H | -0.910890066 | 2.404206175  | -1.628222117 |
| O | 4.917382354  | 1.126880084  | 1.244867089  |
| H | 5.122782371  | 1.994705144  | 1.564938112  |
| H | 5.129718371  | 0.509437038  | 1.942016140  |
| O | -1.807260132 | -3.474277250 | 0.885866062  |
| H | -2.434976175 | -4.172162302 | 1.015550075  |
| H | -1.174809085 | -3.530969252 | 1.598095114  |
| O | 4.875153353  | -0.962577067 | 3.187166227  |
| H | 3.977210286  | -1.156625084 | 2.930384211  |
| H | 5.356003384  | -1.779240128 | 3.152925226  |
| O | 0.249151016  | -3.376281243 | 3.024416219  |
| H | 0.891296066  | -2.700656196 | 2.826355203  |
| H | 0.723747050  | -4.090329295 | 3.427695247  |

Coord\_9

|   |              |              |              |
|---|--------------|--------------|--------------|
| C | -0.533104041 | -0.206633016 | 0.061288002  |
| N | 0.263532022  | -0.903576064 | 0.901986066  |
| C | 1.555097113  | -0.634286043 | 1.254072090  |
| C | 1.454789105  | 0.860624064  | -0.584948044 |
| N | 0.064732004  | 0.754140054  | -0.572865043 |
| N | 2.099671150  | 0.415499033  | 0.581023041  |
| H | 3.074877223  | 0.610028045  | 0.724294050  |
| N | -1.857089134 | -0.468031035 | 0.015839000  |
| H | -2.092712152 | -1.388974098 | 0.340828027  |
| H | -2.290190163 | -0.214413017 | -0.854661062 |
| H | 1.854146136  | 1.757036126  | -1.028929073 |
| O | 2.134707156  | -1.275065091 | 2.105818152  |
| O | -2.766950199 | 0.431155032  | -2.803885199 |
| H | -2.480630180 | -0.036103001 | -3.576793255 |
| H | -2.421330176 | 1.316635097  | -2.868055206 |
| O | -1.346731095 | 2.919174210  | -2.298630165 |
| H | -1.711837123 | 3.685759265  | -1.875391137 |
| H | -0.912239066 | 2.409008172  | -1.624820116 |
| O | 4.917800356  | 1.126152079  | 1.244118091  |
| H | 5.122368369  | 1.994004143  | 1.564643111  |
| H | 5.129862371  | 0.508687035  | 1.941332141  |
| O | -1.807838131 | -3.475055251 | 0.886465064  |
| H | -2.433918175 | -4.174514299 | 1.015669071  |
| H | -1.174725084 | -3.531357255 | 1.598148117  |
| O | 4.875211351  | -0.962975067 | 3.186912228  |
| H | 3.977200285  | -1.156620083 | 2.930054211  |
| H | 5.355789385  | -1.779783127 | 3.152304226  |

|   |             |              |             |
|---|-------------|--------------|-------------|
| O | 0.249698016 | -3.376510245 | 3.023606218 |
| H | 0.891260066 | -2.700380193 | 2.825312205 |
| H | 0.724481051 | -4.088999292 | 3.429427245 |

Coord\_10

|   |              |              |              |
|---|--------------|--------------|--------------|
| C | -0.533673038 | -0.207645014 | 0.062313002  |
| N | 0.262369017  | -0.902803063 | 0.904136065  |
| C | 1.554121109  | -0.633366047 | 1.254824088  |
| C | 1.454543107  | 0.858796063  | -0.585176040 |
| N | 0.063997003  | 0.754815052  | -0.570179040 |
| N | 2.098345148  | 0.418020028  | 0.582824043  |
| H | 3.074295223  | 0.610300042  | 0.724124052  |
| N | -1.857491134 | -0.469087034 | 0.015601003  |
| H | -2.093587152 | -1.389462100 | 0.341863023  |
| H | -2.289872165 | -0.216321018 | -0.855486060 |
| H | 1.854996132  | 1.752325125  | -1.033960072 |
| O | 2.134961155  | -1.274335091 | 2.105551151  |
| O | -2.764036200 | 0.430891031  | -2.804599202 |
| H | -2.478059178 | -0.035569003 | -3.578125258 |
| H | -2.418954175 | 1.316614094  | -2.868257209 |
| O | -1.347239095 | 2.921258211  | -2.297742168 |
| H | -1.714106124 | 3.688796266  | -1.877729137 |
| H | -0.913591066 | 2.413792173  | -1.621395117 |
| O | 4.918200356  | 1.125437081  | 1.243343090  |
| H | 5.121926368  | 1.993323145  | 1.564308110  |
| H | 5.130001370  | 0.507962036  | 1.940628140  |
| O | -1.808420131 | -3.475823251 | 0.887045064  |
| H | -2.432870177 | -4.176843303 | 1.015764075  |
| H | -1.174654084 | -3.531735252 | 1.598187117  |
| O | 4.875291352  | -0.963333071 | 3.186660228  |
| H | 3.977214287  | -1.156588084 | 2.929736212  |
| H | 5.355607385  | -1.780278130 | 3.151695228  |
| O | 0.250223018  | -3.376738241 | 3.022790216  |
| H | 0.891209064  | -2.700111196 | 2.824264201  |
| H | 0.725182052  | -4.087664295 | 3.431151246  |

LIIC path connecting S<sub>i</sub>/T<sub>1</sub> and T1-MIN

Coord\_1

|   |              |              |              |
|---|--------------|--------------|--------------|
| C | -0.533673038 | -0.207645014 | 0.062313002  |
| N | 0.262369017  | -0.902803063 | 0.904136065  |
| C | 1.554121109  | -0.633366047 | 1.254824088  |
| C | 1.454543107  | 0.858796063  | -0.585176040 |
| N | 0.063997003  | 0.754815052  | -0.570179040 |
| N | 2.098345148  | 0.418020028  | 0.582824043  |
| H | 3.074295223  | 0.610300042  | 0.724124052  |
| N | -1.857491134 | -0.469087034 | 0.015601003  |
| H | -2.093587152 | -1.389462100 | 0.341863023  |

|   |              |              |              |
|---|--------------|--------------|--------------|
| H | -2.289872165 | -0.216321018 | -0.855486060 |
| H | 1.854996132  | 1.752325125  | -1.033960072 |
| O | 2.134961155  | -1.274335091 | 2.105551151  |
| O | -2.764036200 | 0.430891031  | -2.804599202 |
| H | -2.478059178 | -0.035569003 | -3.578125258 |
| H | -2.418954175 | 1.316614094  | -2.868257209 |
| O | -1.347239095 | 2.921258211  | -2.297742168 |
| H | -1.714106124 | 3.688796266  | -1.877729137 |
| H | -0.913591066 | 2.413792173  | -1.621395117 |
| O | 4.918200356  | 1.125437081  | 1.243343090  |
| H | 5.121926368  | 1.993323145  | 1.564308110  |
| H | 5.130001370  | 0.507962036  | 1.940628140  |
| O | -1.808420131 | -3.475823251 | 0.887045064  |
| H | -2.432870177 | -4.176843303 | 1.015764075  |
| H | -1.174654084 | -3.531735252 | 1.598187117  |
| O | 4.875291352  | -0.963333071 | 3.186660228  |
| H | 3.977214287  | -1.156588084 | 2.929736212  |
| H | 5.355607385  | -1.780278130 | 3.151695228  |
| O | 0.250223018  | -3.376738241 | 3.022790216  |
| H | 0.891209064  | -2.700111196 | 2.824264201  |
| H | 0.725182052  | -4.087664295 | 3.431151246  |

Coord\_2

|   |              |              |              |
|---|--------------|--------------|--------------|
| C | -0.520863038 | -0.205488014 | 0.067003005  |
| N | 0.275749020  | -0.916616065 | 0.906960067  |
| C | 1.571987112  | -0.631112043 | 1.248052090  |
| C | 1.458436105  | 0.871256060  | -0.585222041 |
| N | 0.068066006  | 0.755778054  | -0.576022041 |
| N | 2.111669154  | 0.416094029  | 0.570377042  |
| H | 3.084439223  | 0.620636043  | 0.715845053  |
| N | -1.849118132 | -0.469409034 | 0.028090004  |
| H | -2.086896150 | -1.395668100 | 0.340953024  |
| H | -2.291320163 | -0.208070012 | -0.835775059 |
| H | 1.853594135  | 1.771986129  | -1.023908075 |
| O | 2.151991154  | -1.269781092 | 2.104711151  |
| O | -2.780884198 | 0.432419031  | -2.792311198 |
| H | -2.494422180 | -0.037532002 | -3.563522257 |
| H | -2.431530173 | 1.315830097  | -2.857419204 |
| O | -1.347031096 | 2.910094211  | -2.293469168 |
| H | -1.707606124 | 3.671753266  | -1.857798131 |
| H | -0.905301065 | 2.391654170  | -1.630140115 |
| O | 4.923993355  | 1.134131082  | 1.241753087  |
| H | 5.134345370  | 2.001977145  | 1.558562113  |
| H | 5.142372370  | 0.516724036  | 1.936991142  |
| O | -1.826164132 | -3.492286252 | 0.863734060  |
| H | -2.427318176 | -4.219176303 | 0.955856066  |
| H | -1.195094084 | -3.552245257 | 1.573234113  |



|   |             |              |             |
|---|-------------|--------------|-------------|
| O | 4.899484352 | -0.956812067 | 3.184171227 |
| H | 4.001859288 | -1.156424081 | 2.931542210 |
| H | 5.383685387 | -1.771757128 | 3.155159227 |
| O | 0.227020014 | -3.377032241 | 2.997390216 |
| H | 0.851637063 | -2.690092194 | 2.801252204 |
| H | 0.639156046 | -4.046207289 | 3.528119257 |

Coord\_3

|   |              |              |              |
|---|--------------|--------------|--------------|
| C | -0.508000036 | -0.203962015 | 0.070604003  |
| N | 0.288499022  | -0.931747068 | 0.908288064  |
| C | 1.588208115  | -0.630198043 | 1.240170090  |
| C | 1.461792105  | 0.883096063  | -0.585200043 |
| N | 0.071897006  | 0.756082056  | -0.582375041 |
| N | 2.123670153  | 0.413509030  | 0.558069041  |
| H | 3.092970222  | 0.630269043  | 0.708545053  |
| N | -1.839885132 | -0.470245033 | 0.039908003  |
| H | -2.078715149 | -1.401654100 | 0.340545023  |
| H | -2.291638167 | -0.200011013 | -0.816442061 |
| H | 1.851721134  | 1.791101128  | -1.013149071 |
| O | 2.167756159  | -1.266801089 | 2.101869151  |
| O | -2.796549199 | 0.433706032  | -2.780317200 |
| H | -2.509367183 | -0.039707005 | -3.549118253 |
| H | -2.442945177 | 1.314927093  | -2.846716203 |
| O | -1.346079096 | 2.898819206  | -2.288671165 |
| H | -1.700189122 | 3.654390262  | -1.837569135 |
| H | -0.897384065 | 2.369146171  | -1.638417119 |
| O | 4.927771352  | 1.143346085  | 1.241236091  |
| H | 5.144070373  | 2.011150147  | 1.554158110  |
| H | 5.153156372  | 0.525950040  | 1.934173140  |
| O | -1.843323133 | -3.507312251 | 0.843456062  |
| H | -2.422227173 | -4.255564309 | 0.902244066  |
| H | -1.213732088 | -3.571708259 | 1.551003112  |
| O | 4.923095357  | -0.950410070 | 3.181880228  |
| H | 4.026135289  | -1.156876083 | 2.933431214  |
| H | 5.411742391  | -1.762941125 | 3.158507226  |
| O | 0.206808015  | -3.381122241 | 2.974738213  |
| H | 0.817808058  | -2.687473195 | 2.775010198  |
| H | 0.548872041  | -3.993133288 | 3.614303259  |

Coord\_4

|   |              |              |              |
|---|--------------|--------------|--------------|
| C | -0.495250034 | -0.202750014 | 0.073150007  |
| N | 0.300308020  | -0.947855070 | 0.908246063  |
| C | 1.602524116  | -0.630441047 | 1.231292089  |
| C | 1.464548107  | 0.894297062  | -0.585224041 |
| N | 0.075401006  | 0.755925054  | -0.589320043 |
| N | 2.134267155  | 0.410253029  | 0.545815037  |
| H | 3.099828221  | 0.639033044  | 0.702122053  |

|   |              |              |              |
|---|--------------|--------------|--------------|
| N | -1.829964133 | -0.471153032 | 0.051029001  |
| H | -2.069141147 | -1.407044104 | 0.340533026  |
| H | -2.291000164 | -0.191720012 | -0.797504056 |
| H | 1.849438131  | 1.809536129  | -1.001888073 |
| O | 2.182103159  | -1.265006093 | 2.097254149  |
| O | -2.811351202 | 0.434906031  | -2.768670200 |
| H | -2.523277183 | -0.042021002 | -3.534940256 |
| H | -2.453452177 | 1.314027094  | -2.836294205 |
| O | -1.344466095 | 2.887523209  | -2.283669165 |
| H | -1.691905122 | 3.636856259  | -1.817422129 |
| H | -0.889888063 | 2.346416167  | -1.646477118 |
| O | 4.929553357  | 1.152632082  | 1.241684088  |
| H | 5.151272369  | 2.020409146  | 1.550880111  |
| H | 5.162236371  | 0.535254040  | 1.932154139  |
| O | -1.859255136 | -3.520513254 | 0.825967061  |
| H | -2.416977174 | -4.286509308 | 0.854400061  |
| H | -1.230171090 | -3.589705259 | 1.531453109  |
| O | 4.945697358  | -0.944280065 | 3.179956230  |
| H | 4.049595294  | -1.157965082 | 2.935562210  |
| H | 5.439195392  | -1.754076125 | 3.162034229  |
| O | 0.189730015  | -3.389469245 | 2.955334214  |
| H | 0.789860059  | -2.692030194 | 2.747629197  |
| H | 0.456479032  | -3.929905285 | 3.689077264  |

Coord\_5

|   |              |              |              |
|---|--------------|--------------|--------------|
| C | -0.482757032 | -0.201559016 | 0.074655003  |
| N | 0.310884024  | -0.964632069 | 0.906933064  |
| C | 1.614693119  | -0.631697043 | 1.221504088  |
| C | 1.466660107  | 0.904856064  | -0.585397040 |
| N | 0.078505006  | 0.755497055  | -0.596939041 |
| N | 2.143383154  | 0.406303027  | 0.533530039  |
| H | 3.104963225  | 0.646752046  | 0.696480049  |
| N | -1.819501129 | -0.471735032 | 0.061416005  |
| H | -2.058223146 | -1.411487102 | 0.340813025  |
| H | -2.289559167 | -0.182808011 | -0.778986053 |
| H | 1.846822132  | 1.827187132  | -0.990304071 |
| O | 2.194844160  | -1.264086092 | 2.091067151  |
| O | -2.825605205 | 0.436167029  | -2.757407196 |
| H | -2.536525184 | -0.044396003 | -3.521004252 |
| H | -2.463315178 | 1.313251093  | -2.826275202 |
| O | -1.342307099 | 2.876292205  | -2.278730163 |
| H | -1.682843121 | 3.619285262  | -1.797674129 |
| H | -0.882886064 | 2.323602166  | -1.654534117 |
| O | 4.929358355  | 1.161567086  | 1.242990092  |
| H | 5.156103371  | 2.029343145  | 1.548531114  |
| H | 5.169514374  | 0.544269040  | 1.930904137  |
| O | -1.873261135 | -3.531540255 | 0.811045056  |

|   |              |              |             |
|---|--------------|--------------|-------------|
| H | -2.410721172 | -4.312451313 | 0.811778056 |
| H | -1.243933091 | -3.605852262 | 1.514549108 |
| O | 4.966924357  | -0.938595067 | 3.178532230 |
| H | 4.071853293  | -1.159749082 | 2.938066214 |
| H | 5.465539392  | -1.745414123 | 3.165982230 |
| O | 0.175968014  | -3.402529244 | 2.939679209 |
| H | 0.767758055  | -2.703568195 | 2.720897194 |
| H | 0.363598026  | -3.857648280 | 3.752061269 |

Coord\_6

|   |              |              |              |
|---|--------------|--------------|--------------|
| C | -0.470656034 | -0.200098015 | 0.075098004  |
| N | 0.319917022  | -0.981785069 | 0.904413063  |
| C | 1.624451115  | -0.633860045 | 1.210862085  |
| C | 1.468093108  | 0.914770067  | -0.585831045 |
| N | 0.081141007  | 0.754992056  | -0.605334042 |
| N | 2.150927153  | 0.401608029  | 0.521135035  |
| H | 3.108315224  | 0.653227049  | 0.691536052  |
| N | -1.808616128 | -0.471595033 | 0.071014005  |
| H | -2.045949145 | -1.414622102 | 0.341293025  |
| H | -2.287455163 | -0.172892013 | -0.760919053 |
| H | 1.843972132  | 1.843966131  | -0.978562073 |
| O | 2.205708158  | -1.263796092 | 2.083483152  |
| O | -2.839649204 | 0.437633030  | -2.746553199 |
| H | -2.549511183 | -0.046747005 | -3.507319252 |
| H | -2.472824176 | 1.312716095  | -2.816764204 |
| O | -1.339751099 | 2.865212207  | -2.274114166 |
| H | -1.673129120 | 3.601809258  | -1.778619128 |
| H | -0.876477061 | 2.300835167  | -1.662794119 |
| O | 4.927182357  | 1.169726084  | 1.245073092  |
| H | 5.158682369  | 2.037527146  | 1.546952112  |
| H | 5.174874373  | 0.552609038  | 1.930416141  |
| O | -1.884521138 | -3.540026253 | 0.798554060  |
| H | -2.402351175 | -4.333710310 | 0.773919054  |
| H | -1.254376092 | -3.619735259 | 1.500320108  |
| O | 4.986402360  | -0.933572068 | 3.177746227  |
| H | 4.092514294  | -1.162334086 | 2.941074211  |
| H | 5.490276396  | -1.737247125 | 3.170585226  |
| O | 0.165841012  | -3.420904247 | 2.928340211  |
| H | 0.751422052  | -2.721999195 | 2.696375194  |
| H | 0.271483021  | -3.777082272 | 3.802784273  |

Coord\_7

|   |              |              |              |
|---|--------------|--------------|--------------|
| C | -0.459091035 | -0.198043014 | 0.074403004  |
| N | 0.327024026  | -0.999009074 | 0.900695064  |
| C | 1.631444119  | -0.636861046 | 1.199387088  |
| C | 1.468815107  | 0.924037067  | -0.586660043 |
| N | 0.083241005  | 0.754624056  | -0.614662045 |

|   |              |              |              |
|---|--------------|--------------|--------------|
| N | 2.156755156  | 0.396088028  | 0.508543035  |
| H | 3.109775224  | 0.658210046  | 0.687225052  |
| N | -1.797408127 | -0.470298035 | 0.079739005  |
| H | -2.032221144 | -1.416012102 | 0.341918026  |
| H | -2.284823163 | -0.161558010 | -0.743355052 |
| H | 1.841019132  | 1.859780133  | -0.966843072 |
| O | 2.214273162  | -1.263946093 | 2.074645152  |
| O | -2.853877204 | 0.439462030  | -2.736124195 |
| H | -2.562711186 | -0.048979006 | -3.493891252 |
| H | -2.482325177 | 1.312555093  | -2.807874201 |
| O | -1.336987095 | 2.854377207  | -2.270113162 |
| H | -1.662920121 | 3.584572256  | -1.760583127 |
| H | -0.870793062 | 2.278253163  | -1.671504122 |
| O | 4.922972355  | 1.176625084  | 1.247905090  |
| H | 5.159079374  | 2.044473148  | 1.546043113  |
| H | 5.178131374  | 0.559821041  | 1.930732139  |
| O | -1.891992136 | -3.545499258 | 0.788532057  |
| H | -2.390431172 | -4.350420315 | 0.740583052  |
| H | -1.260574091 | -3.630836260 | 1.488961107  |
| O | 5.003658360  | -0.929507066 | 3.177782227  |
| H | 4.111080298  | -1.165898084 | 2.944750214  |
| H | 5.512799397  | -1.729949125 | 3.176130231  |
| O | 0.159930012  | -3.445516249 | 2.922028211  |
| H | 0.740844053  | -2.747451197 | 2.675483192  |
| H | 0.181249013  | -3.688469266 | 3.840288277  |

Coord\_8

|   |              |              |              |
|---|--------------|--------------|--------------|
| C | -0.448242034 | -0.194978014 | 0.072378007  |
| N | 0.331672022  | -1.015947075 | 0.895700065  |
| C | 1.635132119  | -0.640659047 | 1.187041086  |
| C | 1.468783108  | 0.932649067  | -0.588082043 |
| N | 0.084721008  | 0.754663056  | -0.625186047 |
| N | 2.160622156  | 0.389622027  | 0.495649034  |
| H | 3.109142222  | 0.661365048  | 0.683505047  |
| N | -1.785949127 | -0.467297034 | 0.087452007  |
| H | -2.016789145 | -1.415056101 | 0.342699023  |
| H | -2.281798163 | -0.148303009 | -0.726383051 |
| H | 1.838141133  | 1.874523133  | -0.955376071 |
| O | 2.219848161  | -1.264396089 | 2.064641151  |
| O | -2.868793207 | 0.441850033  | -2.726145198 |
| H | -2.576740183 | -0.050969003 | -3.480734249 |
| H | -2.492265179 | 1.312936095  | -2.799756204 |
| O | -1.334266097 | 2.843912203  | -2.267128163 |
| H | -1.652418117 | 3.567757257  | -1.743999125 |
| H | -0.866016063 | 2.256033163  | -1.681014120 |
| O | 4.916569352  | 1.181643087  | 1.251553090  |
| H | 5.157275372  | 2.049543147  | 1.545810111  |

|   |              |              |             |
|---|--------------|--------------|-------------|
| H | 5.178953372  | 0.565302042  | 1.932007139 |
| O | -1.894228138 | -3.547254253 | 0.781353058 |
| H | -2.373028173 | -4.362406312 | 0.711951049 |
| H | -1.261120091 | -3.638408262 | 1.480997106 |
| O | 5.017963359  | -0.926849067 | 3.178933230 |
| H | 4.126797296  | -1.170740083 | 2.949334212 |
| H | 5.532225398  | -1.724066124 | 3.183036227 |
| O | 0.159275012  | -3.477865251 | 2.921764210 |
| H | 0.736238052  | -2.780440202 | 2.659600191 |
| H | 0.094232006  | -3.591542261 | 3.862563279 |

Coord\_9

|   |              |              |              |
|---|--------------|--------------|--------------|
| C | -0.438372031 | -0.190285016 | 0.068623007  |
| N | 0.333015026  | -1.032091077 | 0.889174066  |
| C | 1.634586119  | -0.645237049 | 1.173680086  |
| C | 1.467918104  | 0.940611068  | -0.590428044 |
| N | 0.085457009  | 0.755507057  | -0.637391044 |
| N | 2.162072155  | 0.382027026  | 0.482302035  |
| H | 3.106017224  | 0.662203048  | 0.680366047  |
| N | -1.774266127 | -0.461806032 | 0.093899005  |
| H | -1.999121144 | -1.410826102 | 0.343774025  |
| H | -2.278524165 | -0.132434010 | -0.710178051 |
| H | 1.835602130  | 1.888060138  | -0.944512067 |
| O | 2.221232160  | -1.265057090 | 2.053461149  |
| O | -2.885112208 | 0.445082030  | -2.716667195 |
| H | -2.592480185 | -0.052536003 | -3.467892250 |
| H | -2.503283179 | 1.314108096  | -2.792653200 |
| O | -1.331952095 | 2.834017203  | -2.265796161 |
| H | -1.641895121 | 3.551646255  | -1.729549125 |
| H | -0.862417065 | 2.234435159  | -1.691902122 |
| O | 4.907612355  | 1.183863086  | 1.256270091  |
| H | 5.153098369  | 2.051779149  | 1.546462110  |
| H | 5.176686371  | 0.568131039  | 1.934614141  |
| O | -1.888991135 | -3.544095255 | 0.778045055  |
| H | -2.347353170 | -4.368946313 | 0.689012051  |
| H | -1.253690093 | -3.641230264 | 1.477636105  |
| O | 5.028028364  | -0.926352064 | 3.181719231  |
| H | 4.138338297  | -1.177393084 | 2.955218214  |
| H | 5.547040398  | -1.720492124 | 3.192004230  |
| O | 0.165758010  | -3.520483255 | 2.929186212  |
| H | 0.738274051  | -2.822201204 | 2.650228192  |
| H | 0.012659999  | -3.485381251 | 3.865458280  |

Coord\_10

|   |              |              |             |
|---|--------------|--------------|-------------|
| C | -0.423898028 | -0.152036010 | 0.053306003 |
| N | 0.319811022  | -0.996880072 | 0.905004064 |
| C | 1.620508115  | -0.606153044 | 1.180635083 |

|   |              |              |              |
|---|--------------|--------------|--------------|
| C | 1.489371108  | 0.936257066  | -0.624707046 |
| N | 0.107005006  | 0.759349053  | -0.687253050 |
| N | 2.169131157  | 0.388648029  | 0.461328031  |
| H | 3.110036225  | 0.672011047  | 0.668896050  |
| N | -1.759399125 | -0.405889031 | 0.087894007  |
| H | -1.987531141 | -1.344138095 | 0.363768025  |
| H | -2.262516162 | -0.086644006 | -0.720380054 |
| H | 1.870221133  | 1.872892134  | -0.993036070 |
| O | 2.195130159  | -1.198825086 | 2.086624153  |
| O | -2.870002208 | 0.416966028  | -2.755116198 |
| H | -2.577399183 | -0.113193009 | -3.483789253 |
| H | -2.472259178 | 1.276549089  | -2.859336207 |
| O | -1.273743090 | 2.788246202  | -2.379464170 |
| H | -1.571062111 | 3.520601251  | -1.856362135 |
| H | -0.814580060 | 2.190624157  | -1.794270127 |
| O | 4.907009353  | 1.193007083  | 1.250597089  |
| H | 5.165241373  | 2.066870151  | 1.510222110  |
| H | 5.169779370  | 0.597335041  | 1.948988140  |
| O | -1.908706136 | -3.461944250 | 0.868896062  |
| H | -2.353677172 | -4.294625310 | 0.785986058  |
| H | -1.276836094 | -3.549353256 | 1.577374116  |
| O | 5.005178363  | -0.855862061 | 3.243423235  |
| H | 4.115876295  | -1.110795080 | 3.020890216  |
| H | 5.519218396  | -1.651977117 | 3.290351235  |
| O | 0.129721008  | -3.457999249 | 3.051432221  |
| H | 0.705336053  | -2.771724198 | 2.735364196  |
| H | -0.116294008 | -3.217004231 | 3.935135281  |

LIIC path connecting T1-MIN and S<sub>1</sub>/T<sub>1</sub>/S<sub>0</sub>-III

Coord\_1

|   |              |              |              |
|---|--------------|--------------|--------------|
| C | -0.423898028 | -0.152036010 | 0.053306003  |
| N | 0.319811022  | -0.996880072 | 0.905004064  |
| C | 1.620508115  | -0.606153044 | 1.180635083  |
| C | 1.489371108  | 0.936257066  | -0.624707046 |
| N | 0.107005006  | 0.759349053  | -0.687253050 |
| N | 2.169131157  | 0.388648029  | 0.461328031  |
| H | 3.110036225  | 0.672011047  | 0.668896050  |
| N | -1.759399125 | -0.405889031 | 0.087894007  |
| H | -1.987531141 | -1.344138095 | 0.363768025  |
| H | -2.262516162 | -0.086644006 | -0.720380054 |
| H | 1.870221133  | 1.872892134  | -0.993036070 |
| O | 2.195130159  | -1.198825086 | 2.086624153  |
| O | -2.870002208 | 0.416966028  | -2.755116198 |
| H | -2.577399183 | -0.113193009 | -3.483789253 |
| H | -2.472259178 | 1.276549089  | -2.859336207 |
| O | -1.273743090 | 2.788246202  | -2.379464170 |
| H | -1.571062111 | 3.520601251  | -1.856362135 |

|   |              |              |              |
|---|--------------|--------------|--------------|
| H | -0.814580060 | 2.190624157  | -1.794270127 |
| O | 4.907009353  | 1.193007083  | 1.250597089  |
| H | 5.165241373  | 2.066870151  | 1.510222110  |
| H | 5.169779370  | 0.597335041  | 1.948988140  |
| O | -1.908706136 | -3.461944250 | 0.868896062  |
| H | -2.353677172 | -4.294625310 | 0.785986058  |
| H | -1.276836094 | -3.549353256 | 1.577374116  |
| O | 5.005178363  | -0.855862061 | 3.243423235  |
| H | 4.115876295  | -1.110795080 | 3.020890216  |
| H | 5.519218396  | -1.651977117 | 3.290351235  |
| O | 0.129721008  | -3.457999249 | 3.051432221  |
| H | 0.705336053  | -2.771724198 | 2.735364196  |
| H | -0.116294008 | -3.217004231 | 3.935135281  |

Coord\_2

|   |              |              |              |
|---|--------------|--------------|--------------|
| C | -0.408578029 | -0.160743013 | 0.036891005  |
| N | 0.352191023  | -1.021099076 | 0.866303062  |
| C | 1.635060119  | -0.594855041 | 1.179596086  |
| C | 1.505070109  | 0.914719065  | -0.644526046 |
| N | 0.113611006  | 0.756028053  | -0.699049052 |
| N | 2.175090158  | 0.415260030  | 0.473611034  |
| H | 3.115571223  | 0.698910053  | 0.682497049  |
| N | -1.743235125 | -0.405063027 | 0.095411007  |
| H | -1.973708142 | -1.347601100 | 0.353121026  |
| H | -2.261103163 | -0.064820006 | -0.695281050 |
| H | 1.898242138  | 1.827834131  | -1.056086074 |
| O | 2.203509157  | -1.171606086 | 2.097954150  |
| O | -2.883745206 | 0.409544032  | -2.736006199 |
| H | -2.588242184 | -0.119382006 | -3.464392250 |
| H | -2.487413180 | 1.269977089  | -2.838855206 |
| O | -1.291310092 | 2.784350203  | -2.365620168 |
| H | -1.580293116 | 3.519523254  | -1.841878130 |
| H | -0.820074058 | 2.190811157  | -1.785505126 |
| O | 4.920699353  | 1.201851085  | 1.255222093  |
| H | 5.179234375  | 2.074088150  | 1.520027108  |
| H | 5.176926374  | 0.602736046  | 1.953002140  |
| O | -1.914981136 | -3.459504251 | 0.857520064  |
| H | -2.357684171 | -4.292068310 | 0.762419054  |
| H | -1.286410091 | -3.553460253 | 1.568073111  |
| O | 4.994001362  | -0.853448061 | 3.243248231  |
| H | 4.100493297  | -1.098345079 | 3.026593218  |
| H | 5.498933397  | -1.655448117 | 3.288643236  |
| O | 0.107837010  | -3.459482247 | 3.052042219  |
| H | 0.697803051  | -2.778078198 | 2.751994200  |
| H | -0.146818010 | -3.226318232 | 3.935436283  |

Coord\_3

|   |              |              |              |
|---|--------------|--------------|--------------|
| C | -0.394832031 | -0.168931010 | 0.019946003  |
| N | 0.382752026  | -1.044485075 | 0.825974062  |
| C | 1.645996117  | -0.585985041 | 1.179336085  |
| C | 1.520741111  | 0.888777066  | -0.663156049 |
| N | 0.120279009  | 0.752226052  | -0.711276052 |
| N | 2.177912155  | 0.438557032  | 0.486432036  |
| H | 3.117992225  | 0.722549051  | 0.696440049  |
| N | -1.728160125 | -0.404050029 | 0.105021009  |
| H | -1.961009142 | -1.350365098 | 0.345475023  |
| H | -2.261250163 | -0.043282005 | -0.666601046 |
| H | 1.928738141  | 1.774949130  | -1.116736079 |
| O | 2.204669161  | -1.148865081 | 2.110518151  |
| O | -2.896842211 | 0.405261030  | -2.717998197 |
| H | -2.599085185 | -0.122552011 | -3.446263246 |
| H | -2.500901178 | 1.266099093  | -2.819218205 |
| O | -1.305516093 | 2.781636201  | -2.352181172 |
| H | -1.585166113 | 3.519891254  | -1.827775133 |
| H | -0.822908061 | 2.191559160  | -1.777534129 |
| O | 4.930988353  | 1.210435086  | 1.257680089  |
| H | 5.189071373  | 2.081785150  | 1.525872109  |
| H | 5.181862375  | 0.609499042  | 1.955746141  |
| O | -1.921158137 | -3.456583250 | 0.847341059  |
| H | -2.361587170 | -4.288947307 | 0.740791056  |
| H | -1.294173094 | -3.557243257 | 1.558354115  |
| O | 4.983123361  | -0.847316060 | 3.244581234  |
| H | 4.085645293  | -1.083465080 | 3.034967220  |
| H | 5.479778393  | -1.654483120 | 3.289498238  |
| O | 0.090571004  | -3.461244249 | 3.049500221  |
| H | 0.694099048  | -2.785060200 | 2.764677197  |
| H | -0.170956013 | -3.236060231 | 3.932994283  |

Coord\_4

|   |              |              |              |
|---|--------------|--------------|--------------|
| C | -0.382658028 | -0.176715012 | 0.002432998  |
| N | 0.411485027  | -1.067174078 | 0.783845054  |
| C | 1.653298118  | -0.579734044 | 1.179704086  |
| C | 1.536234109  | 0.858067064  | -0.680619052 |
| N | 0.127022008  | 0.747877051  | -0.723963050 |
| N | 2.177581155  | 0.458369031  | 0.499588039  |
| H | 3.117289224  | 0.742797055  | 0.710445053  |
| N | -1.714033124 | -0.403031029 | 0.116495006  |
| H | -1.949356141 | -1.352687096 | 0.340423026  |
| H | -2.262645164 | -0.022106004 | -0.634551045 |
| H | 1.961527143  | 1.713734123  | -1.174812086 |
| O | 2.198667159  | -1.131023081 | 2.123949151  |
| O | -2.909453208 | 0.404522028  | -2.701042194 |
| H | -2.610162187 | -0.122291010 | -3.429394245 |
| H | -2.512796182 | 1.265283091  | -2.800341204 |



|   |              |              |              |
|---|--------------|--------------|--------------|
| O | -1.316256095 | 2.780334198  | -2.339014168 |
| H | -1.585482117 | 3.521891253  | -1.813865132 |
| H | -0.823010060 | 2.192976159  | -1.770277125 |
| O | 4.937737358  | 1.218905087  | 1.257975090  |
| H | 5.194437373  | 2.090169148  | 1.527807109  |
| H | 5.184480374  | 0.617792043  | 1.957270140  |
| O | -1.927023141 | -3.453370250 | 0.838364059  |
| H | -2.365148168 | -4.285494309 | 0.721124051  |
| H | -1.300008094 | -3.560740256 | 1.548342113  |
| O | 4.972538356  | -0.837408058 | 3.247470235  |
| H | 4.071380293  | -1.066229079 | 3.045913220  |
| H | 5.461902393  | -1.648967119 | 3.293058236  |
| O | 0.077851006  | -3.463060248 | 3.044184218  |
| H | 0.694213049  | -2.792434200 | 2.773729198  |
| H | -0.188935016 | -3.245942236 | 3.928163281  |

Coord\_5

|   |              |              |              |
|---|--------------|--------------|--------------|
| C | -0.372087024 | -0.184148015 | -0.015634002 |
| N | 0.438346033  | -1.089213078 | 0.739817052  |
| C | 1.656885119  | -0.576260043 | 1.180605084  |
| C | 1.551337113  | 0.822176061  | -0.696890051 |
| N | 0.133844008  | 0.742944056  | -0.737096054 |
| N | 2.174043155  | 0.474526035  | 0.512887035  |
| H | 3.113424224  | 0.759504054  | 0.724218050  |
| N | -1.700743123 | -0.402212027 | 0.129600012  |
| H | -1.938643138 | -1.354851098 | 0.337554023  |
| H | -2.264984165 | -0.001444998 | -0.599370045 |
| H | 1.996342143  | 1.643587117  | -1.230095090 |
| O | 2.185477156  | -1.118449078 | 2.137927152  |
| O | -2.921724209 | 0.407773029  | -2.685028195 |
| H | -2.621711190 | -0.118173011 | -3.413704245 |
| H | -2.523144180 | 1.267926093  | -2.782100200 |
| O | -1.323374095 | 2.780676199  | -2.325991168 |
| H | -1.580969113 | 3.525724253  | -1.799988131 |
| H | -0.820272060 | 2.195179156  | -1.763646127 |
| O | 4.940800358  | 1.227328091  | 1.256063093  |
| H | 5.195040376  | 2.099348151  | 1.525805110  |
| H | 5.184639376  | 0.627714043  | 1.957578142  |
| O | -1.932222138 | -3.450089251 | 0.830537062  |
| H | -2.367920173 | -4.282011307 | 0.703361052  |
| H | -1.303680092 | -3.563988256 | 1.538116112  |
| O | 4.962154358  | -0.823670061 | 3.251935237  |
| H | 4.057647292  | -1.046685076 | 3.059317221  |
| H | 5.445336394  | -1.638804117 | 3.299453237  |
| O | 0.069658004  | -3.464633248 | 3.036443217  |
| H | 0.698140052  | -2.799831204 | 2.779477200  |
| H | -0.200963014 | -3.255633233 | 3.921251284  |

## Coord\_6

|   |              |              |              |
|---|--------------|--------------|--------------|
| C | -0.363181024 | -0.191223014 | -0.034175002 |
| N | 0.463247034  | -1.110561077 | 0.693886049  |
| C | 1.656627119  | -0.575686039 | 1.181997085  |
| C | 1.565757114  | 0.780638055  | -0.711878049 |
| N | 0.140746008  | 0.737424054  | -0.750597054 |
| N | 2.167213154  | 0.486856034  | 0.526150038  |
| H | 3.106343224  | 0.772497055  | 0.737445052  |
| N | -1.688218122 | -0.401834030 | 0.144073009  |
| H | -1.928738141 | -1.357184097 | 0.336400025  |
| H | -2.267976165 | 0.018463000  | -0.561380039 |
| H | 2.032804149  | 1.563798110  | -1.282307094 |
| O | 2.165017158  | -1.111454080 | 2.152171153  |
| O | -2.933789213 | 0.415506028  | -2.669764194 |
| H | -2.633962188 | -0.109747006 | -3.399014243 |
| H | -2.531959183 | 1.274452092  | -2.764315198 |
| O | -1.326664096 | 2.782905200  | -2.312967169 |
| H | -1.571286111 | 3.531608254  | -1.785992128 |
| H | -0.814548061 | 2.198297158  | -1.757524128 |
| O | 4.940033357  | 1.235671089  | 1.251834088  |
| H | 5.190619375  | 2.109317152  | 1.519737109  |
| H | 5.182177373  | 0.639294044  | 1.956609139  |
| O | -1.936230137 | -3.447024251 | 0.823720058  |
| H | -2.369188172 | -4.278900306 | 0.687322050  |
| H | -1.304816092 | -3.567032258 | 1.527692109  |
| O | 4.951799354  | -0.806056057 | 3.257958237  |
| H | 4.044305289  | -1.024843073 | 3.075048221  |
| H | 5.429998392  | -1.623912117 | 3.308783240  |
| O | 0.065997007  | -3.465548249 | 3.026632218  |
| H | 0.705838052  | -2.806695205 | 2.782311198  |
| H | -0.207289016 | -3.264719233 | 3.912550282  |

## Coord\_7

|   |              |              |              |
|---|--------------|--------------|--------------|
| C | -0.356034025 | -0.197881017 | -0.053030006 |
| N | 0.486055034  | -1.131107083 | 0.646170047  |
| C | 1.652350118  | -0.578097040 | 1.183899086  |
| C | 1.579102112  | 0.732932054  | -0.725413054 |
| N | 0.147723009  | 0.731348052  | -0.764309053 |
| N | 2.156992154  | 0.495182035  | 0.539209037  |
| H | 3.095991221  | 0.781576059  | 0.749781052  |
| N | -1.676447119 | -0.402193029 | 0.159585010  |
| H | -1.919507136 | -1.360086100 | 0.336387023  |
| H | -2.271352162 | 0.037267001  | -0.521049039 |
| H | 2.070376146  | 1.473540104  | -1.331093098 |
| O | 2.137167152  | -1.110279079 | 2.166440158  |
| O | -2.945759213 | 0.428268032  | -2.654949189 |

|   |              |              |              |
|---|--------------|--------------|--------------|
| H | -2.647140189 | -0.096525005 | -3.385024246 |
| H | -2.539223183 | 1.285322091  | -2.746718197 |
| O | -1.325867097 | 2.787273198  | -2.299758164 |
| H | -1.556025110 | 3.539776254  | -1.771697130 |
| H | -0.805657058 | 2.202473160  | -1.751742126 |
| O | 4.935309355  | 1.243794092  | 1.245091090  |
| H | 5.180971373  | 2.119944153  | 1.509354111  |
| H | 5.176921373  | 0.652472045  | 1.954220142  |
| O | -1.938316138 | -3.444545246 | 0.817631058  |
| H | -2.367901170 | -4.276705310 | 0.672649049  |
| H | -1.302890094 | -3.569920259 | 1.517011110  |
| O | 4.941237357  | -0.784524057 | 3.265463235  |
| H | 4.031137290  | -1.000684073 | 3.092944223  |
| H | 5.415704389  | -1.604227115 | 3.321102238  |
| O | 0.066859005  | -3.465225249 | 3.015148220  |
| H | 0.717182051  | -2.812204204 | 2.782741203  |
| H | -0.208282017 | -3.272655235 | 3.902362281  |

Coord\_8

|   |              |              |              |
|---|--------------|--------------|--------------|
| C | -0.350773024 | -0.204029014 | -0.071947008 |
| N | 0.506592038  | -1.150690081 | 0.596925045  |
| C | 1.643846118  | -0.583553042 | 1.186395088  |
| C | 1.590841116  | 0.678487049  | -0.737216051 |
| N | 0.154767009  | 0.724776051  | -0.777963059 |
| N | 2.143269154  | 0.499324037  | 0.551908042  |
| H | 3.082320223  | 0.786504059  | 0.760848053  |
| N | -1.665517122 | -0.403671027 | 0.175690011  |
| H | -1.910830137 | -1.364062100 | 0.336749023  |
| H | -2.274888162 | 0.054477004  | -0.479082034 |
| H | 2.108302153  | 1.371866099  | -1.375985098 |
| O | 2.101797152  | -1.115091078 | 2.180531159  |
| O | -2.957715210 | 0.446662032  | -2.640153192 |
| H | -2.661445194 | -0.077973008 | -3.371300241 |
| H | -2.544880183 | 1.301037095  | -2.728928194 |
| O | -1.320680096 | 2.794046201  | -2.286088166 |
| H | -1.534718111 | 3.550465258  | -1.756850125 |
| H | -0.793387057 | 2.207863159  | -1.746036124 |
| O | 4.926529357  | 1.251426093  | 1.235538091  |
| H | 5.165961372  | 2.130938154  | 1.494273110  |
| H | 5.168705373  | 0.667075046  | 1.950166142  |
| O | -1.937486139 | -3.443142249 | 0.811803060  |
| H | -2.362570170 | -4.276157310 | 0.658751045  |
| H | -1.297182091 | -3.572691258 | 1.505918110  |
| O | 4.930177357  | -0.759069055 | 3.274298236  |
| H | 4.017863291  | -0.974171071 | 3.112792223  |
| H | 5.402173390  | -1.579723112 | 3.336395238  |
| O | 0.072188005  | -3.462814249 | 3.002475218  |

|   |              |              |             |
|---|--------------|--------------|-------------|
| H | 0.731914054  | -2.815140201 | 2.781467198 |
| H | -0.204497013 | -3.278660238 | 3.891032279 |

Coord\_9

|   |              |              |              |
|---|--------------|--------------|--------------|
| C | -0.347563024 | -0.209566018 | -0.090586006 |
| N | 0.524616037  | -1.169141084 | 0.546559039  |
| C | 1.630875116  | -0.592109045 | 1.189625085  |
| C | 1.600263117  | 0.616682047  | -0.746882055 |
| N | 0.161856011  | 0.717786054  | -0.791149055 |
| N | 2.125919151  | 0.499076038  | 0.564111039  |
| H | 3.065287219  | 0.786979059  | 0.770239055  |
| N | -1.655655121 | -0.406776027 | 0.191756012  |
| H | -1.902639135 | -1.369782098 | 0.336408026  |
| H | -2.278433162 | 0.069420006  | -0.436540030 |
| H | 2.145527153  | 1.257727091  | -1.416373102 |
| O | 2.058776147  | -1.126000083 | 2.194281158  |
| O | -2.969701213 | 0.471362036  | -2.624794187 |
| H | -2.677050192 | -0.053476002 | -3.357256242 |
| H | -2.548833185 | 1.322150097  | -2.710410198 |
| O | -1.310769093 | 2.803505202  | -2.271530161 |
| H | -1.506856109 | 3.563909255  | -1.741044125 |
| H | -0.777509056 | 2.214634161  | -1.739994126 |
| O | 4.913625354  | 1.258117089  | 1.222778087  |
| H | 5.145533373  | 2.141811154  | 1.473980104  |
| H | 5.157369369  | 0.682773052  | 1.944088139  |
| O | -1.932374139 | -3.443461247 | 0.805516059  |
| H | -2.351071169 | -4.278246306 | 0.644751047  |
| H | -1.286689094 | -3.575338256 | 1.494146107  |
| O | 4.918285353  | -0.729775051 | 3.284200237  |
| H | 4.004148287  | -0.945304066 | 3.134306225  |
| H | 5.389035390  | -1.550470109 | 3.354531243  |
| O | 0.081872007  | -3.457006248 | 2.989243215  |
| H | 0.749585055  | -2.813648202 | 2.779460198  |
| H | -0.196752012 | -3.281525236 | 3.878986279  |

Coord\_10

|   |              |              |              |
|---|--------------|--------------|--------------|
| C | -0.279066020 | -0.221724018 | -0.067443005 |
| N | 0.576741039  | -1.195788084 | 0.576110043  |
| C | 1.644928116  | -0.617284044 | 1.285418095  |
| C | 1.700646120  | 0.491885033  | -0.685399051 |
| N | 0.267707018  | 0.679219050  | -0.769785053 |
| N | 2.169191155  | 0.458764035  | 0.655589047  |
| H | 3.109632225  | 0.735103051  | 0.871959062  |
| N | -1.589551114 | -0.390287028 | 0.223329018  |
| H | -1.856962132 | -1.348902098 | 0.364873026  |
| H | -2.202189156 | 0.101146008  | -0.402471027 |
| H | 2.300010164  | 1.050128078  | -1.382207101 |

|   |              |              |              |
|---|--------------|--------------|--------------|
| O | 2.008146145  | -1.141668085 | 2.318607167  |
| O | -2.846417207 | 0.488158038  | -2.638677189 |
| H | -2.552359183 | -0.057574003 | -3.355138241 |
| H | -2.399043172 | 1.324826094  | -2.729082196 |
| O | -1.127765080 | 2.778486199  | -2.297183166 |
| H | -1.301762094 | 3.556863255  | -1.785377129 |
| H | -0.611774044 | 2.187477155  | -1.750850129 |
| O | 4.959872355  | 1.192614085  | 1.331232097  |
| H | 5.193482372  | 2.082156151  | 1.559083115  |
| H | 5.180235372  | 0.639821047  | 2.077220149  |
| O | -1.929670138 | -3.406028244 | 0.871079061  |
| H | -2.349978170 | -4.240188307 | 0.711322053  |
| H | -1.295928095 | -3.534091255 | 1.571384115  |
| O | 4.888650352  | -0.722688050 | 3.459663247  |
| H | 3.972543287  | -0.927002068 | 3.306458237  |
| H | 5.342839386  | -1.548621111 | 3.567457256  |
| O | 0.039307000  | -3.393977243 | 3.092942223  |
| H | 0.728402053  | -2.769150200 | 2.896238208  |
| H | -0.258807019 | -3.203881233 | 3.973354288  |

### Relaxation pathway II'

LIIC path connecting S2-MIN and S<sub>1</sub>/S<sub>0</sub>-I

Coord\_1

|   |              |              |              |
|---|--------------|--------------|--------------|
| C | -0.373591026 | -0.216509014 | 0.096070008  |
| N | 0.391908030  | -1.007749071 | 0.993653070  |
| C | 1.592742116  | -0.571826041 | 1.213374089  |
| C | 1.499077108  | 0.898384062  | -0.590315044 |
| N | 0.118952008  | 0.714147050  | -0.641966046 |
| N | 2.155088153  | 0.470830033  | 0.562369040  |
| H | 3.111154223  | 0.715774053  | 0.752050053  |
| N | -1.697154121 | -0.504147038 | 0.118751010  |
| H | -1.929674139 | -1.434006103 | 0.412078029  |
| H | -2.207295161 | -0.190024015 | -0.686825052 |
| H | 1.899777138  | 1.775449129  | -1.067684078 |
| O | 2.324976169  | -1.146852085 | 2.127243153  |
| O | -2.842168205 | 0.383047026  | -2.740070196 |
| H | -2.509548182 | -0.156216013 | -3.444381249 |
| H | -2.414772172 | 1.231371090  | -2.817512201 |
| O | -1.196135087 | 2.720983196  | -2.330915168 |
| H | -1.509102106 | 3.451587251  | -1.814755129 |
| H | -0.772810058 | 2.110702152  | -1.728699123 |
| O | 4.914020353  | 1.165513081  | 1.289280094  |
| H | 5.203465375  | 2.049216147  | 1.471849108  |
| H | 5.220375377  | 0.610337042  | 2.002503142  |
| O | -2.284770166 | -3.608108261 | 0.685903050  |
| H | -2.832611205 | -4.362884312 | 0.518890038  |

|   |              |              |             |
|---|--------------|--------------|-------------|
| H | -1.676933121 | -3.839280279 | 1.382490100 |
| O | 5.237757378  | -0.776232056 | 3.396705247 |
| H | 4.363718317  | -1.136281081 | 3.308363238 |
| H | 5.833102422  | -1.512325108 | 3.468175248 |
| O | -0.184234012 | -3.475678252 | 2.664271191 |
| H | 0.055879006  | -2.686603196 | 2.188077158 |
| H | -0.394389030 | -3.202874230 | 3.547525255 |

Coord\_2

|   |              |              |              |
|---|--------------|--------------|--------------|
| C | -0.378987025 | -0.212114017 | 0.085153007  |
| N | 0.392769028  | -1.010208073 | 0.980517070  |
| C | 1.584290113  | -0.563294042 | 1.201168087  |
| C | 1.500276107  | 0.885860061  | -0.611243046 |
| N | 0.111122010  | 0.717608049  | -0.650824049 |
| N | 2.150018153  | 0.477785036  | 0.553915042  |
| H | 3.103501225  | 0.726506053  | 0.749918056  |
| N | -1.704949125 | -0.493596038 | 0.126166011  |
| H | -1.933724139 | -1.427093100 | 0.410633031  |
| H | -2.220710159 | -0.177294011 | -0.675050048 |
| H | 1.902910137  | 1.758144128  | -1.096148078 |
| O | 2.328958170  | -1.135603084 | 2.122764154  |
| O | -2.848951204 | 0.387391026  | -2.745518198 |
| H | -2.499977181 | -0.155392010 | -3.439086248 |
| H | -2.419473176 | 1.235172091  | -2.817744203 |
| O | -1.201191085 | 2.724172198  | -2.332369167 |
| H | -1.513813107 | 3.455160250  | -1.816596131 |
| H | -0.777388055 | 2.114086150  | -1.729690124 |
| O | 4.907062355  | 1.162555081  | 1.301744091  |
| H | 5.204306375  | 2.044846149  | 1.478921106  |
| H | 5.211213377  | 0.608281045  | 2.016274144  |
| O | -2.279089162 | -3.614445259 | 0.689151050  |
| H | -2.823064202 | -4.372199314 | 0.522922035  |
| H | -1.667467119 | -3.843146278 | 1.383023097  |
| O | 5.253793381  | -0.786649059 | 3.404606244  |
| H | 4.379679313  | -1.155082082 | 3.365637240  |
| H | 5.858439423  | -1.516550107 | 3.458379252  |
| O | -0.183563015 | -3.464321251 | 2.667054192  |
| H | 0.046356001  | -2.680166194 | 2.179724158  |
| H | -0.418998032 | -3.184000229 | 3.537560255  |

Coord\_3

|   |              |              |              |
|---|--------------|--------------|--------------|
| C | -0.384389030 | -0.207881017 | 0.074574007  |
| N | 0.393564027  | -1.012776075 | 0.967717072  |
| C | 1.575597112  | -0.554902042 | 1.189644088  |
| C | 1.501346109  | 0.872770063  | -0.631291043 |
| N | 0.103493010  | 0.720916053  | -0.659207048 |
| N | 2.144502152  | 0.484720036  | 0.546222038  |

|   |              |              |              |
|---|--------------|--------------|--------------|
| H | 3.095238223  | 0.737624052  | 0.748558055  |
| N | -1.712482122 | -0.483296036 | 0.133932010  |
| H | -1.937640140 | -1.420364104 | 0.409306029  |
| H | -2.233705159 | -0.164747012 | -0.662906050 |
| H | 1.905998135  | 1.740169125  | -1.123679080 |
| O | 2.332509166  | -1.124247083 | 2.119169152  |
| O | -2.855079203 | 0.391573029  | -2.751161196 |
| H | -2.489970180 | -0.154714012 | -3.433544249 |
| H | -2.423483176 | 1.238759087  | -2.818035203 |
| O | -1.205701088 | 2.727178195  | -2.333619168 |
| H | -1.518077111 | 3.458546249  | -1.818286133 |
| H | -0.781511054 | 2.117298150  | -1.730404122 |
| O | 4.899796355  | 1.159796083  | 1.313448095  |
| H | 5.204975377  | 2.040497148  | 1.485116105  |
| H | 5.202262375  | 0.606228044  | 2.028963148  |
| O | -2.274618165 | -3.620821263 | 0.691514049  |
| H | -2.815207200 | -4.381098318 | 0.525689040  |
| H | -1.659420122 | -3.847742278 | 1.382589098  |
| O | 5.269935377  | -0.796170058 | 3.411802245  |
| H | 4.398437319  | -1.172551086 | 3.422651246  |
| H | 5.883183423  | -1.519868112 | 3.447867246  |
| O | -0.182892013 | -3.452963249 | 2.669836193  |
| H | 0.036833001  | -2.673729192 | 2.171371154  |
| H | -0.443608034 | -3.165125228 | 3.527595255  |

Coord\_4

|   |              |              |              |
|---|--------------|--------------|--------------|
| C | -0.389860030 | -0.203796017 | 0.064360003  |
| N | 0.394189028  | -1.015425073 | 0.955336070  |
| C | 1.566546112  | -0.546614042 | 1.178924084  |
| C | 1.502259109  | 0.859102060  | -0.650357045 |
| N | 0.096037008  | 0.724071050  | -0.667082047 |
| N | 2.138444152  | 0.491656037  | 0.539411040  |
| H | 3.086251221  | 0.749168053  | 0.748122055  |
| N | -1.719822122 | -0.473239033 | 0.142009012  |
| H | -1.941509141 | -1.413802099 | 0.408054027  |
| H | -2.246310161 | -0.152385013 | -0.650471046 |
| H | 1.909044138  | 1.721497122  | -1.150173085 |
| O | 2.335457170  | -1.112721078 | 2.116644151  |
| O | -2.860501206 | 0.395572027  | -2.757082197 |
| H | -2.479471176 | -0.154221010 | -3.427816249 |
| H | -2.426748173 | 1.242107091  | -2.818466202 |
| O | -1.209622085 | 2.729979199  | -2.334723170 |
| H | -1.521867111 | 3.461732251  | -1.819909130 |
| H | -0.785161055 | 2.120323155  | -1.730870126 |
| O | 4.892182351  | 1.157251085  | 1.324426094  |
| H | 5.205467374  | 2.036183147  | 1.490426108  |
| H | 5.193535375  | 0.604202041  | 2.040585145  |

|   |              |              |             |
|---|--------------|--------------|-------------|
| O | -2.271451166 | -3.627244263 | 0.692938049 |
| H | -2.809119201 | -4.389603318 | 0.527115040 |
| H | -1.652910120 | -3.853063277 | 1.381169098 |
| O | 5.286467382  | -0.804830060 | 3.418257244 |
| H | 4.420354316  | -1.188709085 | 3.479301253 |
| H | 5.907673423  | -1.522291109 | 3.436499249 |
| O | -0.182220011 | -3.441605248 | 2.672618195 |
| H | 0.027310002  | -2.667291190 | 2.163018154 |
| H | -0.468217035 | -3.146249227 | 3.517629254 |

Coord\_5

|   |              |              |              |
|---|--------------|--------------|--------------|
| C | -0.395473029 | -0.199854012 | 0.054546003  |
| N | 0.394522028  | -1.018134074 | 0.943463069  |
| C | 1.556999114  | -0.538408037 | 1.169146084  |
| C | 1.502987109  | 0.844832060  | -0.668315045 |
| N | 0.088720005  | 0.727067050  | -0.674407050 |
| N | 2.131738154  | 0.498604033  | 0.533624037  |
| H | 3.076412223  | 0.761166057  | 0.748793052  |
| N | -1.727052123 | -0.463419033 | 0.150346009  |
| H | -1.945429137 | -1.407393101 | 0.406825029  |
| H | -2.258562165 | -0.140213011 | -0.637834044 |
| H | 1.912054140  | 1.702089123  | -1.175497084 |
| O | 2.337595168  | -1.100976079 | 2.115397150  |
| O | -2.865153209 | 0.399371028  | -2.763377199 |
| H | -2.468407176 | -0.153948012 | -3.421967248 |
| H | -2.429196173 | 1.245193088  | -2.819125202 |
| O | -1.212892088 | 2.732548195  | -2.335733168 |
| H | -1.525141109 | 3.464704248  | -1.821546129 |
| H | -0.788314057 | 2.123144151  | -1.731111124 |
| O | 4.884171354  | 1.154929081  | 1.334705098  |
| H | 5.205763375  | 2.031912147  | 1.494830106  |
| H | 5.185048372  | 0.602222045  | 2.051137146  |
| O | -2.269704161 | -3.633718259 | 0.693354051  |
| H | -2.804903204 | -4.397734317 | 0.527106039  |
| H | -1.648088119 | -3.859103280 | 1.378737100  |
| O | 5.303716380  | -0.812631058 | 3.423926246  |
| H | 4.445857320  | -1.203562085 | 3.535483255  |
| H | 5.932288426  | -1.523788109 | 3.424121248  |
| O | -0.181549014 | -3.430247247 | 2.675401191  |
| H | 0.017787002  | -2.660853193 | 2.154665155  |
| H | -0.492826037 | -3.127374226 | 3.507664254  |

Coord\_6

|   |              |              |              |
|---|--------------|--------------|--------------|
| C | -0.401312029 | -0.196054016 | 0.045167003  |
| N | 0.394418029  | -1.020895072 | 0.932203066  |
| C | 1.546793111  | -0.530276038 | 1.160467085  |
| C | 1.503499109  | 0.829919062  | -0.685014049 |



|   |              |              |              |
|---|--------------|--------------|--------------|
| N | 0.081508007  | 0.729890052  | -0.681131046 |
| N | 2.124260154  | 0.505553036  | 0.529029037  |
| H | 3.065571223  | 0.773626054  | 0.750784055  |
| N | -1.734273127 | -0.453835035 | 0.158881013  |
| H | -1.949523138 | -1.401128103 | 0.405549029  |
| H | -2.270509162 | -0.128238010 | -0.625104045 |
| H | 1.915042139  | 1.681892120  | -1.199487086 |
| O | 2.338682167  | -1.088981076 | 2.115664151  |
| O | -2.868954204 | 0.402961030  | -2.770160199 |
| H | -2.456686175 | -0.153922009 | -3.416076245 |
| H | -2.430740175 | 1.247999088  | -2.820109202 |
| O | -1.215435086 | 2.734863198  | -2.336700171 |
| H | -1.527842109 | 3.467452249  | -1.823273131 |
| H | -0.790935056 | 2.125740152  | -1.731141123 |
| O | 4.875700353  | 1.152839085  | 1.344300097  |
| H | 5.205828374  | 2.027691148  | 1.498283109  |
| H | 5.176826370  | 0.600311043  | 2.060598147  |
| O | -2.269525162 | -3.640247264 | 0.692679049  |
| H | -2.802691201 | -4.405504317 | 0.525548040  |
| H | -1.645141120 | -3.865857280 | 1.375250097  |
| O | 5.322069385  | -0.819536059 | 3.428752247  |
| H | 4.475463322  | -1.217087088 | 3.591098260  |
| H | 5.957461430  | -1.524277111 | 3.410567246  |
| O | -0.180878012 | -3.418889246 | 2.678183192  |
| H | 0.008264002  | -2.654416191 | 2.146311155  |
| H | -0.517435039 | -3.108499224 | 3.497698254  |

Coord\_7

|   |              |              |              |
|---|--------------|--------------|--------------|
| C | -0.407477028 | -0.192405016 | 0.036264004  |
| N | 0.393703026  | -1.023716074 | 0.921669068  |
| C | 1.535737111  | -0.522234036 | 1.153065081  |
| C | 1.503762110  | 0.814306058  | -0.700270049 |
| N | 0.074365004  | 0.732517052  | -0.687190052 |
| N | 2.115866154  | 0.512470038  | 0.525824038  |
| H | 3.053557222  | 0.786531057  | 0.754348053  |
| N | -1.741611128 | -0.444491029 | 0.167540009  |
| H | -1.953936143 | -1.395003099 | 0.404143032  |
| H | -2.282212165 | -0.116465007 | -0.612406046 |
| H | 1.918032139  | 1.660829120  | -1.221939087 |
| O | 2.338426167  | -1.076736078 | 2.117714152  |
| O | -2.871806205 | 0.406341028  | -2.777561198 |
| H | -2.444201174 | -0.154161012 | -3.410234245 |
| H | -2.431269178 | 1.250519088  | -2.821527201 |
| O | -1.217149086 | 2.736902197  | -2.337667168 |
| H | -1.529890110 | 3.469962248  | -1.825168131 |
| H | -0.792975055 | 2.128090154  | -1.730970125 |
| O | 4.866692349  | 1.150985081  | 1.353219099  |

|   |              |              |             |
|---|--------------|--------------|-------------|
| H | 5.205605373  | 2.023527148  | 1.500715107 |
| H | 5.168904370  | 0.598493044  | 2.068929148 |
| O | -2.271101163 | -3.646832261 | 0.690803052 |
| H | -2.802659201 | -4.412920318 | 0.522295040 |
| H | -1.644310116 | -3.873324278 | 1.370653098 |
| O | 5.341994385  | -0.825455060 | 3.432671249 |
| H | 4.509804327  | -1.229223091 | 3.646048264 |
| H | 5.983706431  | -1.523608109 | 3.395661243 |
| O | -0.180207015 | -3.407531245 | 2.680965193 |
| H | -0.001259003 | -2.647978189 | 2.137958156 |
| H | -0.542045040 | -3.089624223 | 3.487732253 |

Coord\_8

|   |              |              |              |
|---|--------------|--------------|--------------|
| C | -0.414089029 | -0.188931015 | 0.027879000  |
| N | 0.392166031  | -1.026628073 | 0.911990067  |
| C | 1.523600108  | -0.514328038 | 1.147146080  |
| C | 1.503741107  | 0.797905056  | -0.713869052 |
| N | 0.067247003  | 0.734910055  | -0.692507050 |
| N | 2.106391151  | 0.519288037  | 0.524242036  |
| H | 3.040170218  | 0.799823059  | 0.759780052  |
| N | -1.749218125 | -0.435393033 | 0.176233011  |
| H | -1.958850141 | -1.389015098 | 0.402503027  |
| H | -2.293752166 | -0.104897007 | -0.599889046 |
| H | 1.921060139  | 1.638796116  | -1.242607089 |
| O | 2.336481171  | -1.064278076 | 2.121852154  |
| O | -2.873589204 | 0.409528029  | -2.785734203 |
| H | -2.430822176 | -0.154668011 | -3.404547246 |
| H | -2.430646177 | 1.252756090  | -2.823501202 |
| O | -1.217900089 | 2.738642195  | -2.338674166 |
| H | -1.531175111 | 3.472227249  | -1.827300133 |
| H | -0.794365056 | 2.130167154  | -1.730597123 |
| O | 4.857046347  | 1.149367085  | 1.361457098  |
| H | 5.205010377  | 2.019426146  | 1.502028107  |
| H | 5.161321371  | 0.596793041  | 2.076068152  |
| O | -2.274678163 | -3.653476261 | 0.687585051  |
| H | -2.805042203 | -4.419981320 | 0.517160036  |
| H | -1.645901119 | -3.881507279 | 1.364864100  |
| O | 5.364053387  | -0.830235060 | 3.435608247  |
| H | 4.549661328  | -1.239849091 | 3.700242264  |
| H | 6.011635432  | -1.521543111 | 3.379212245  |
| O | -0.179535013 | -3.396173244 | 2.683747194  |
| H | -0.010782002 | -2.641541192 | 2.129605151  |
| H | -0.566654042 | -3.070749222 | 3.477767253  |

Coord\_9

|   |              |              |             |
|---|--------------|--------------|-------------|
| C | -0.421290031 | -0.185672014 | 0.020061004 |
| N | 0.389551027  | -1.029690072 | 0.903306067 |

|   |              |              |              |
|---|--------------|--------------|--------------|
| C | 1.510107109  | -0.506647035 | 1.142939084  |
| C | 1.503394110  | 0.780596054  | -0.725554053 |
| N | 0.060110006  | 0.737012053  | -0.696989049 |
| N | 2.095642153  | 0.525894038  | 0.524554039  |
| H | 3.025179219  | 0.813392058  | 0.767429055  |
| N | -1.757280124 | -0.426554032 | 0.184854012  |
| H | -1.964487144 | -1.383167097 | 0.400499027  |
| H | -2.305227169 | -0.093534005 | -0.587727044 |
| H | 1.924174141  | 1.615649114  | -1.261192090 |
| O | 2.332427170  | -1.051696078 | 2.128423155  |
| O | -2.874157207 | 0.412560030  | -2.794854202 |
| H | -2.416400175 | -0.155429010 | -3.399134244 |
| H | -2.428705176 | 1.254730090  | -2.826163202 |
| O | -1.217516086 | 2.740065195  | -2.339746168 |
| H | -1.531543111 | 3.474240249  | -1.829731131 |
| H | -0.795015055 | 2.131940151  | -1.730007123 |
| O | 4.846637351  | 1.147972083  | 1.369005097  |
| H | 5.203918377  | 2.015387148  | 1.502095106  |
| H | 5.154122370  | 0.595243044  | 2.081932150  |
| O | -2.280568165 | -3.660175264 | 0.682846052  |
| H | -2.810145202 | -4.426675317 | 0.509908037  |
| H | -1.650303117 | -3.890416280 | 1.357770098  |
| O | 5.388938387  | -0.833634061 | 3.437484249  |
| H | 4.596003332  | -1.248759092 | 3.753597269  |
| H | 6.041991436  | -1.517733109 | 3.361021242  |
| O | -0.178864011 | -3.384815242 | 2.686529196  |
| H | -0.020305002 | -2.635103190 | 2.121252152  |
| H | -0.591263044 | -3.051874221 | 3.467801247  |

Coord\_10

|   |              |              |              |
|---|--------------|--------------|--------------|
| C | -0.412763027 | -0.198008014 | 0.034189004  |
| N | 0.405097027  | -1.056480078 | 0.906308063  |
| C | 1.516807107  | -0.526772038 | 1.149285083  |
| C | 1.516957108  | 0.748820056  | -0.716934052 |
| N | 0.067351003  | 0.727846052  | -0.674833049 |
| N | 2.103976150  | 0.508137035  | 0.540272037  |
| H | 3.030796218  | 0.799438056  | 0.788131057  |
| N | -1.749006126 | -0.432124030 | 0.219997017  |
| H | -1.954863140 | -1.392721101 | 0.418584030  |
| H | -2.303200166 | -0.089682007 | -0.543891038 |
| H | 1.940422142  | 1.581051114  | -1.255276090 |
| O | 2.351911170  | -1.075651080 | 2.137841155  |
| O | -2.870726207 | 0.425988029  | -2.766074199 |
| H | -2.402418175 | -0.142367011 | -3.361889241 |
| H | -2.421135174 | 1.266280093  | -2.786699200 |
| O | -1.206202086 | 2.744934198  | -2.293296164 |

|   |              |              |              |
|---|--------------|--------------|--------------|
| H | -1.517070108 | 3.476532248  | -1.777719130 |
| H | -0.783142058 | 2.131773154  | -1.688415119 |
| O | 4.861567352  | 1.111179082  | 1.378857102  |
| H | 5.230761375  | 1.974148142  | 1.508285110  |
| H | 5.176342374  | 0.552358038  | 2.083569149  |
| O | -2.275856164 | -3.683598263 | 0.681468048  |
| H | -2.807469200 | -4.447300318 | 0.502444035  |
| H | -1.641552119 | -3.922996283 | 1.349164099  |
| O | 5.450944392  | -0.887440063 | 3.423129247  |
| H | 4.684658339  | -1.309065095 | 3.791900272  |
| H | 6.107292438  | -1.564321112 | 3.317193237  |
| O | -0.178674015 | -3.374133244 | 2.689807195  |
| H | -0.030319004 | -2.629336189 | 2.113399151  |
| H | -0.616389046 | -3.033691220 | 3.458318248  |

LIIC path connecting S<sub>1</sub>/S<sub>0</sub>-I and S<sub>0</sub>-MIN

Coord\_1

|   |              |              |              |
|---|--------------|--------------|--------------|
| C | -0.412763027 | -0.198008014 | 0.034189004  |
| N | 0.405097027  | -1.056480078 | 0.906308063  |
| C | 1.516807107  | -0.526772038 | 1.149285083  |
| C | 1.516957108  | 0.748820056  | -0.716934052 |
| N | 0.067351003  | 0.727846052  | -0.674833049 |
| N | 2.103976150  | 0.508137035  | 0.540272037  |
| H | 3.030796218  | 0.799438056  | 0.788131057  |
| N | -1.749006126 | -0.432124030 | 0.219997017  |
| H | -1.954863140 | -1.392721101 | 0.418584030  |
| H | -2.303200166 | -0.089682007 | -0.543891038 |
| H | 1.940422142  | 1.581051114  | -1.255276090 |
| O | 2.351911170  | -1.075651080 | 2.137841155  |
| O | -2.870726207 | 0.425988029  | -2.766074199 |
| H | -2.402418175 | -0.142367011 | -3.361889241 |
| H | -2.421135174 | 1.266280093  | -2.786699200 |
| O | -1.206202086 | 2.744934198  | -2.293296164 |
| H | -1.517070108 | 3.476532248  | -1.777719130 |
| H | -0.783142058 | 2.131773154  | -1.688415119 |
| O | 4.861567352  | 1.111179082  | 1.378857102  |
| H | 5.230761375  | 1.974148142  | 1.508285110  |
| H | 5.176342374  | 0.552358038  | 2.083569149  |
| O | -2.275856164 | -3.683598263 | 0.681468048  |
| H | -2.807469200 | -4.447300318 | 0.502444035  |
| H | -1.641552119 | -3.922996283 | 1.349164099  |
| O | 5.450944392  | -0.887440063 | 3.423129247  |
| H | 4.684658339  | -1.309065095 | 3.791900272  |
| H | 6.107292438  | -1.564321112 | 3.317193237  |
| O | -0.178674015 | -3.374133244 | 2.689807195  |
| H | -0.030319004 | -2.629336189 | 2.113399151  |
| H | -0.616389046 | -3.033691220 | 3.458318248  |

## Coord\_2

|   |              |              |              |
|---|--------------|--------------|--------------|
| C | -0.401755029 | -0.210544017 | 0.057643003  |
| N | 0.397666029  | -1.045499073 | 0.938988065  |
| C | 1.534106112  | -0.534299039 | 1.176916084  |
| C | 1.509398107  | 0.794905060  | -0.673017050 |
| N | 0.078742003  | 0.728872053  | -0.657150046 |
| N | 2.121850154  | 0.500430034  | 0.550537039  |
| H | 3.052938222  | 0.792028055  | 0.787578056  |
| N | -1.739003125 | -0.451149032 | 0.192413012  |
| H | -1.953262141 | -1.405600101 | 0.411504030  |
| H | -2.274806166 | -0.113597009 | -0.586500041 |
| H | 1.934253142  | 1.625795115  | -1.212961087 |
| O | 2.356521171  | -1.085582080 | 2.142966152  |
| O | -2.840912202 | 0.411249030  | -2.770153198 |
| H | -2.399733172 | -0.147367011 | -3.394900244 |
| H | -2.402681170 | 1.257076092  | -2.805358201 |
| O | -1.196445084 | 2.745019199  | -2.301558166 |
| H | -1.517345111 | 3.476039251  | -1.791150130 |
| H | -0.779324055 | 2.134990154  | -1.690634123 |
| O | 4.875431351  | 1.128059080  | 1.380146098  |
| H | 5.231763377  | 1.993378142  | 1.528458108  |
| H | 5.185549376  | 0.564428042  | 2.083529149  |
| O | -2.365140172 | -3.660749263 | 0.747317055  |
| H | -2.927158209 | -4.413002319 | 0.616889045  |
| H | -1.689450121 | -3.911792283 | 1.368979098  |
| O | 5.425487389  | -0.873804065 | 3.417856244  |
| H | 4.628517332  | -1.288100092 | 3.726052270  |
| H | 6.074165440  | -1.560614114 | 3.331095242  |
| O | -0.151197010 | -3.428261245 | 2.632726189  |
| H | -0.063164004 | -2.612325189 | 2.148331157  |
| H | -0.477360033 | -3.274157236 | 3.508955251  |

## Coord\_3

|   |              |              |              |
|---|--------------|--------------|--------------|
| C | -0.390220029 | -0.223749016 | 0.081023006  |
| N | 0.393167028  | -1.034479074 | 0.968840070  |
| C | 1.553583111  | -0.542800039 | 1.200875087  |
| C | 1.500206108  | 0.836360059  | -0.631288048 |
| N | 0.090146006  | 0.729198052  | -0.640596048 |
| N | 2.138679155  | 0.491485033  | 0.555944040  |
| H | 3.073781223  | 0.783053056  | 0.781644058  |
| N | -1.726284123 | -0.471918032 | 0.167818013  |
| H | -1.949454139 | -1.419772103 | 0.406546031  |
| H | -2.245094159 | -0.138912012 | -0.624317042 |
| H | 1.926212140  | 1.665296122  | -1.173919083 |
| O | 2.363628170  | -1.096456080 | 2.143979156  |
| O | -2.815161204 | 0.396269028  | -2.769263201 |

|   |              |              |              |
|---|--------------|--------------|--------------|
| H | -2.405177172 | -0.153867011 | -3.421963247 |
| H | -2.387672174 | 1.246798088  | -2.820144202 |
| O | -1.189052087 | 2.744110200  | -2.309060169 |
| H | -1.518869110 | 3.474704248  | -1.803575132 |
| H | -0.776942053 | 2.137289154  | -1.692809121 |
| O | 4.888631350  | 1.139619084  | 1.374500100  |
| H | 5.234749376  | 2.005598146  | 1.541907111  |
| H | 5.191765372  | 0.569328044  | 2.076056150  |
| O | -2.403469174 | -3.658948261 | 0.770196054  |
| H | -3.001287215 | -4.392324316 | 0.706119050  |
| H | -1.718552123 | -3.902312279 | 1.385243102  |
| O | 5.389704387  | -0.869280065 | 3.403465243  |
| H | 4.564359326  | -1.272070091 | 3.647069264  |
| H | 6.027363432  | -1.568301112 | 3.335651242  |
| O | -0.152246009 | -3.446185246 | 2.607465188  |
| H | -0.079412005 | -2.596210186 | 2.183280155  |
| H | -0.378280028 | -3.432061245 | 3.527501252  |

Coord\_4

|   |              |              |              |
|---|--------------|--------------|--------------|
| C | -0.378384027 | -0.237123018 | 0.104552010  |
| N | 0.390548029  | -1.023267072 | 0.996713069  |
| C | 1.574309116  | -0.551954038 | 1.222463089  |
| C | 1.489702109  | 0.873740061  | -0.590596042 |
| N | 0.101688007  | 0.729254055  | -0.624605047 |
| N | 2.153956153  | 0.481882032  | 0.558144041  |
| H | 3.092811225  | 0.773536057  | 0.771953055  |
| N | -1.711510123 | -0.493349033 | 0.145809012  |
| H | -1.944405142 | -1.434134105 | 0.403204028  |
| H | -2.214290159 | -0.164326014 | -0.658112048 |
| H | 1.916893138  | 1.700105121  | -1.136783080 |
| O | 2.371881171  | -1.107819082 | 2.142609153  |
| O | -2.792129199 | 0.382385025  | -2.765304198 |
| H | -2.417055175 | -0.160385009 | -3.444508246 |
| H | -2.374601173 | 1.236714087  | -2.832367202 |
| O | -1.182498084 | 2.743087200  | -2.315879168 |
| H | -1.520325109 | 3.473386253  | -1.815108132 |
| H | -0.774981055 | 2.139362153  | -1.694811120 |
| O | 4.899998352  | 1.148684081  | 1.365100097  |
| H | 5.237262376  | 2.014176147  | 1.551971110  |
| H | 5.194408374  | 0.570511040  | 2.064457151  |
| O | -2.411787173 | -3.664678261 | 0.767173055  |
| H | -3.049672220 | -4.366628315 | 0.772763056  |
| H | -1.734145125 | -3.892065281 | 1.396741102  |
| O | 5.345199384  | -0.869025065 | 3.383749241  |
| H | 4.495092321  | -1.256855091 | 3.559190259  |
| H | 5.969427429  | -1.581484114 | 3.334916241  |
| O | -0.165465010 | -3.448312247 | 2.603168189  |

|   |              |              |             |
|---|--------------|--------------|-------------|
| H | -0.084463007 | -2.580684184 | 2.218241161 |
| H | -0.301340021 | -3.546725256 | 3.535632256 |

Coord\_5

|   |              |              |              |
|---|--------------|--------------|--------------|
| C | -0.366192027 | -0.250412019 | 0.128607010  |
| N | 0.389478027  | -1.011864075 | 1.023243074  |
| C | 1.596156114  | -0.561657043 | 1.242258091  |
| C | 1.478179105  | 0.907248067  | -0.550550041 |
| N | 0.113496010  | 0.729162052  | -0.608756046 |
| N | 2.167743157  | 0.471882032  | 0.557803039  |
| H | 3.110191226  | 0.764043056  | 0.758801053  |
| N | -1.694956120 | -0.514634035 | 0.126679011  |
| H | -1.938608138 | -1.447831102 | 0.401805031  |
| H | -2.182547155 | -0.188885014 | -0.687739052 |
| H | 1.906695136  | 1.730315125  | -1.101222078 |
| O | 2.381157172  | -1.119449080 | 2.139498152  |
| O | -2.771405199 | 0.370412025  | -2.758847199 |
| H | -2.434830175 | -0.165953012 | -3.462809248 |
| H | -2.362891169 | 1.227591087  | -2.842320205 |
| O | -1.175975085 | 2.742386198  | -2.321813166 |
| H | -1.520864108 | 3.472562250  | -1.825527130 |
| H | -0.772861054 | 2.141517154  | -1.696380120 |
| O | 4.909099354  | 1.156775084  | 1.353819096  |
| H | 5.237879375  | 2.020929147  | 1.560885111  |
| H | 5.193326376  | 0.569785041  | 2.050613149  |
| O | -2.399803171 | -3.672531262 | 0.748391052  |
| H | -3.081464220 | -4.328410314 | 0.818726058  |
| H | -1.739825123 | -3.879252280 | 1.403900103  |
| O | 5.293024380  | -0.870582063 | 3.360580242  |
| H | 4.422802317  | -1.240626088 | 3.464543251  |
| H | 5.902004427  | -1.597015117 | 3.330884238  |
| O | -0.185193013 | -3.441377247 | 2.613226187  |
| H | -0.081821005 | -2.565493182 | 2.253210162  |
| H | -0.237019019 | -3.634730263 | 3.539219257  |

Coord\_6

|   |              |              |              |
|---|--------------|--------------|--------------|
| C | -0.352958024 | -0.263320017 | 0.154045011  |
| N | 0.390702030  | -1.000100073 | 1.049280077  |
| C | 1.620138114  | -0.571316041 | 1.260441093  |
| C | 1.466005107  | 0.937362068  | -0.511174036 |
| N | 0.125843007  | 0.729052052  | -0.592432044 |
| N | 2.180793155  | 0.462409035  | 0.554930041  |
| H | 3.126863226  | 0.756076055  | 0.741202052  |
| N | -1.676232120 | -0.535103039 | 0.111651007  |
| H | -1.931674138 | -1.460144104 | 0.403743027  |
| H | -2.149659154 | -0.211896017 | -0.711960050 |
| H | 1.895698139  | 1.756258124  | -1.067667076 |

|   |              |              |              |
|---|--------------|--------------|--------------|
| O | 2.393045170  | -1.130412082 | 2.134539152  |
| O | -2.753191199 | 0.360746026  | -2.749228196 |
| H | -2.458745177 | -0.169943014 | -3.476019248 |
| H | -2.352693172 | 1.219824088  | -2.849264207 |
| O | -1.169353083 | 2.742211200  | -2.326137168 |
| H | -1.520191111 | 3.472472252  | -1.833992130 |
| H | -0.770379054 | 2.143911157  | -1.696851120 |
| O | 4.915889354  | 1.165875086  | 1.342621097  |
| H | 5.235273378  | 2.027968146  | 1.571690112  |
| H | 5.188508376  | 0.569020041  | 2.036269149  |
| O | -2.373139173 | -3.676753266 | 0.719278053  |
| H | -3.101466221 | -4.271702310 | 0.843039059  |
| H | -1.738697123 | -3.860620277 | 1.406723100  |
| O | 5.233991377  | -0.872348065 | 3.334822238  |
| H | 4.349343312  | -1.222694086 | 3.363746241  |
| H | 5.826623419  | -1.612565117 | 3.324344237  |
| O | -0.210451014 | -3.427405248 | 2.633930189  |
| H | -0.074151004 | -2.550302186 | 2.288178162  |
| H | -0.180645015 | -3.703818269 | 3.539545257  |

Coord\_7

|   |              |              |              |
|---|--------------|--------------|--------------|
| C | -0.337496025 | -0.273836018 | 0.185208015  |
| N | 0.397117029  | -0.986356070 | 1.077644078  |
| C | 1.650064120  | -0.577668041 | 1.276246093  |
| C | 1.451822104  | 0.966968069  | -0.472733034 |
| N | 0.137435010  | 0.730743054  | -0.572328039 |
| N | 2.194785157  | 0.458255036  | 0.547799039  |
| H | 3.145321224  | 0.756124056  | 0.713266049  |
| N | -1.654577118 | -0.552473039 | 0.107694010  |
| H | -1.922216137 | -1.468801105 | 0.416433030  |
| H | -2.116541152 | -0.230897015 | -0.722915051 |
| H | 1.880458136  | 1.780720126  | -1.038042077 |
| O | 2.414476171  | -1.136671080 | 2.124676151  |
| O | -2.743057195 | 0.356218025  | -2.728852194 |
| H | -2.495676182 | -0.168917013 | -3.476982250 |
| H | -2.349677168 | 1.216254089  | -2.845819205 |
| O | -1.167052082 | 2.744877200  | -2.322831165 |
| H | -1.521616111 | 3.475342251  | -1.833486130 |
| H | -0.770762057 | 2.148601154  | -1.691138122 |
| O | 4.919697356  | 1.178744084  | 1.337879097  |
| H | 5.226253377  | 2.036983146  | 1.596671114  |
| H | 5.177346371  | 0.568157043  | 2.025863148  |
| O | -2.336232166 | -3.646312260 | 0.666387046  |
| H | -3.116591223 | -4.163036301 | 0.820112058  |
| H | -1.738773124 | -3.815368272 | 1.390731099  |
| O | 5.163631372  | -0.879591062 | 3.304386238  |
| H | 4.271713306  | -1.209451086 | 3.251067233  |



|   |              |              |             |
|---|--------------|--------------|-------------|
| H | 5.739961415  | -1.632486116 | 3.311724238 |
| O | -0.251395019 | -3.405877243 | 2.658900190 |
| H | -0.066107002 | -2.534156184 | 2.323127166 |
| H | -0.144146009 | -3.761940272 | 3.530105254 |

Coord\_8

|   |              |              |              |
|---|--------------|--------------|--------------|
| C | -0.326166023 | -0.275218017 | 0.220049014  |
| N | 0.385966026  | -0.971209070 | 1.114780081  |
| C | 1.662252120  | -0.592327045 | 1.317172095  |
| C | 1.445454106  | 0.995916070  | -0.406647030 |
| N | 0.158014009  | 0.742776052  | -0.540074040 |
| N | 2.200601159  | 0.443414032  | 0.572029044  |
| H | 3.151978226  | 0.745227053  | 0.726612053  |
| N | -1.636711120 | -0.551738038 | 0.092199007  |
| H | -1.926812137 | -1.458447106 | 0.409490029  |
| H | -2.075752148 | -0.224849017 | -0.748586054 |
| H | 1.884318135  | 1.804777132  | -0.971763071 |
| O | 2.403692174  | -1.157892082 | 2.148238154  |
| O | -2.704874194 | 0.384400026  | -2.725691196 |
| H | -2.501771182 | -0.133200010 | -3.492306250 |
| H | -2.312986166 | 1.243562090  | -2.852092204 |
| O | -1.129121080 | 2.770907201  | -2.311883165 |
| H | -1.488763105 | 3.501284250  | -1.825946132 |
| H | -0.744501054 | 2.172296156  | -1.676424121 |
| O | 4.925531355  | 1.234258090  | 1.291216094  |
| H | 5.211878373  | 2.100985150  | 1.544420110  |
| H | 5.207021377  | 0.633541046  | 1.979223143  |
| O | -2.326671166 | -3.649657263 | 0.642695045  |
| H | -3.146205225 | -4.092832292 | 0.819438061  |
| H | -1.760317125 | -3.791929271 | 1.398000099  |
| O | 5.210315374  | -0.785453055 | 3.276399233  |
| H | 4.319932313  | -1.112325079 | 3.183406227  |
| H | 5.784278417  | -1.539702109 | 3.299659235  |
| O | -0.317335023 | -3.378236241 | 2.699407195  |
| H | -0.090461004 | -2.518680184 | 2.358090171  |
| H | -0.109238007 | -3.802298272 | 3.520400254  |

Coord\_9

|   |              |              |              |
|---|--------------|--------------|--------------|
| C | -0.339245025 | -0.293003019 | 0.227426014  |
| N | 0.352357026  | -0.969183067 | 1.123298083  |
| C | 1.646772119  | -0.631536047 | 1.335461096  |
| C | 1.425364104  | 0.999111073  | -0.361346028 |
| N | 0.162160013  | 0.738264054  | -0.534950038 |
| N | 2.183601160  | 0.395304031  | 0.576986043  |
| H | 3.134961225  | 0.683721052  | 0.737851053  |
| N | -1.641860116 | -0.567363039 | 0.052061003  |
| H | -1.954944141 | -1.463450107 | 0.378266026  |

|   |              |              |              |
|---|--------------|--------------|--------------|
| H | -2.059006149 | -0.236089016 | -0.797965059 |
| H | 1.883311137  | 1.800017130  | -0.923271067 |
| O | 2.356706172  | -1.207918086 | 2.153177156  |
| O | -2.682929192 | 0.391810027  | -2.742325195 |
| H | -2.526368182 | -0.120827010 | -3.523260256 |
| H | -2.291903163 | 1.249353088  | -2.881434209 |
| O | -1.106463081 | 2.777712198  | -2.330536166 |
| H | -1.471501105 | 3.509378254  | -1.850499131 |
| H | -0.734238053 | 2.178362157  | -1.689901123 |
| O | 4.913904352  | 1.200204084  | 1.239440090  |
| H | 5.207279372  | 2.066886148  | 1.484749105  |
| H | 5.190653375  | 0.600349044  | 1.931167139  |
| O | -2.248145163 | -3.703743269 | 0.631082044  |
| H | -3.089309220 | -4.098997297 | 0.817436057  |
| H | -1.709593121 | -3.806792272 | 1.412419100  |
| O | 5.135911370  | -0.790154059 | 3.245908236  |
| H | 4.239800304  | -1.081674080 | 3.095754223  |
| H | 5.677697409  | -1.566404112 | 3.295356236  |
| O | -0.330558025 | -3.352313239 | 2.751657199  |
| H | -0.063679005 | -2.509808183 | 2.393189170  |
| H | 0.013590002  | -3.835015274 | 3.490543253  |

Coord\_10

|   |              |              |              |
|---|--------------|--------------|--------------|
| C | -0.357476028 | -0.325875023 | 0.229680018  |
| N | 0.341885027  | -0.973917071 | 1.110492078  |
| C | 1.653274120  | -0.646333049 | 1.306678092  |
| C | 1.358668096  | 1.022653073  | -0.350634025 |
| N | 0.124605007  | 0.729787053  | -0.539943037 |
| N | 2.151526155  | 0.392262029  | 0.530966037  |
| H | 3.102758223  | 0.691790052  | 0.672735046  |
| N | -1.649147119 | -0.620508046 | 0.029419001  |
| H | -1.963775141 | -1.512845109 | 0.364878027  |
| H | -2.065503149 | -0.287993023 | -0.820383060 |
| H | 1.807123128  | 1.824952131  | -0.918745067 |
| O | 2.363013171  | -1.219113085 | 2.093251151  |
| O | -2.733839197 | 0.356619025  | -2.728166195 |
| H | -2.629401188 | -0.143525009 | -3.525973252 |
| H | -2.360519169 | 1.219526087  | -2.880668210 |
| O | -1.191319087 | 2.765921198  | -2.329191167 |
| H | -1.566105111 | 3.489871251  | -1.844840131 |
| H | -0.810044059 | 2.169065158  | -1.692877120 |
| O | 4.862872351  | 1.248671090  | 1.181207087  |
| H | 5.136525369  | 2.113660152  | 1.453307107  |
| H | 5.132414370  | 0.636409044  | 1.865785136  |
| O | -2.145668152 | -3.642177264 | 0.683196049  |
| H | -2.886480206 | -4.220391304 | 0.804450057  |
| H | -1.559679111 | -3.776041274 | 1.425256104  |

|   |              |              |             |
|---|--------------|--------------|-------------|
| O | 5.025804364  | -0.758670055 | 3.159791227 |
| H | 4.140683299  | -1.031827075 | 2.927287212 |
| H | 5.552154399  | -1.544063112 | 3.226183233 |
| O | -0.264665017 | -3.327435241 | 2.832781203 |
| H | -0.002365999 | -2.522987184 | 2.391665171 |
| H | 0.533658036  | -3.727547270 | 3.149010225 |

### Relaxation pathway III'

LIIC path connecting T1-MIN and S<sub>1</sub>/T<sub>1</sub>/S<sub>0</sub>-II

Coord\_1

|   |              |              |              |
|---|--------------|--------------|--------------|
| C | -0.423898028 | -0.152036010 | 0.053306003  |
| N | 0.319811022  | -0.996880072 | 0.905004064  |
| C | 1.620508115  | -0.606153044 | 1.180635083  |
| C | 1.489371108  | 0.936257066  | -0.624707046 |
| N | 0.107005006  | 0.759349053  | -0.687253050 |
| N | 2.169131157  | 0.388648029  | 0.461328031  |
| H | 3.110036225  | 0.672011047  | 0.668896050  |
| N | -1.759399125 | -0.405889031 | 0.087894007  |
| H | -1.987531141 | -1.344138095 | 0.363768025  |
| H | -2.262516162 | -0.086644006 | -0.720380054 |
| H | 1.870221133  | 1.872892134  | -0.993036070 |
| O | 2.195130159  | -1.198825086 | 2.086624153  |
| O | -2.870002208 | 0.416966028  | -2.755116198 |
| H | -2.577399183 | -0.113193009 | -3.483789253 |
| H | -2.472259178 | 1.276549089  | -2.859336207 |
| O | -1.273743090 | 2.788246202  | -2.379464170 |
| H | -1.571062111 | 3.520601251  | -1.856362135 |
| H | -0.814580060 | 2.190624157  | -1.794270127 |
| O | 4.907009353  | 1.193007083  | 1.250597089  |
| H | 5.165241373  | 2.066870151  | 1.510222110  |
| H | 5.169779370  | 0.597335041  | 1.948988140  |
| O | -1.908706136 | -3.461944250 | 0.868896062  |
| H | -2.353677172 | -4.294625310 | 0.785986058  |
| H | -1.276836094 | -3.549353256 | 1.577374116  |
| O | 5.005178363  | -0.855862061 | 3.243423235  |
| H | 4.115876295  | -1.110795080 | 3.020890216  |
| H | 5.519218396  | -1.651977117 | 3.290351235  |
| O | 0.129721008  | -3.457999249 | 3.051432221  |
| H | 0.705336053  | -2.771724198 | 2.735364196  |
| H | -0.116294008 | -3.217004231 | 3.935135281  |

Coord\_2

|   |              |              |              |
|---|--------------|--------------|--------------|
| C | -0.439740034 | -0.147772011 | 0.062571003  |
| N | 0.316009021  | -0.978188071 | 0.898771065  |
| C | 1.613460115  | -0.579732044 | 1.179117085  |
| C | 1.484093105  | 0.940366069  | -0.634540048 |

|   |              |              |              |
|---|--------------|--------------|--------------|
| N | 0.087336006  | 0.802417059  | -0.646372044 |
| N | 2.160814158  | 0.432466032  | 0.474108032  |
| H | 3.108632223  | 0.696254048  | 0.676480049  |
| N | -1.771167127 | -0.417358032 | 0.088061005  |
| H | -1.992823141 | -1.355929095 | 0.369146027  |
| H | -2.268371164 | -0.109712007 | -0.726590050 |
| H | 1.885271135  | 1.833215133  | -1.080551076 |
| O | 2.196195160  | -1.175256087 | 2.075383147  |
| O | -2.817994202 | 0.401771026  | -2.768317201 |
| H | -2.530545184 | -0.124290009 | -3.502156254 |
| H | -2.436116177 | 1.267032091  | -2.873914209 |
| O | -1.292174095 | 2.826753202  | -2.401336171 |
| H | -1.656794117 | 3.566956258  | -1.937487139 |
| H | -0.826833059 | 2.289765165  | -1.761381126 |
| O | 4.921615354  | 1.181684087  | 1.256123091  |
| H | 5.184510373  | 2.050665146  | 1.527278112  |
| H | 5.172773370  | 0.576744039  | 1.950783141  |
| O | -1.897429136 | -3.467562250 | 0.883014061  |
| H | -2.364113171 | -4.290570310 | 0.826381057  |
| H | -1.263148088 | -3.552043254 | 1.589875113  |
| O | 4.986980360  | -0.884017064 | 3.234467233  |
| H | 4.094718296  | -1.122940079 | 3.005690219  |
| H | 5.489661397  | -1.687885122 | 3.270155238  |
| O | 0.144691009  | -3.457766247 | 3.062373220  |
| H | 0.709124052  | -2.742625196 | 2.792988201  |
| H | -0.067959006 | -3.368133242 | 3.982289287  |

Coord\_3

|   |              |              |              |
|---|--------------|--------------|--------------|
| C | -0.455076035 | -0.147976009 | 0.071686007  |
| N | 0.311453022  | -0.963556072 | 0.894229063  |
| C | 1.605771116  | -0.556868041 | 1.179739086  |
| C | 1.476449108  | 0.936307068  | -0.642898048 |
| N | 0.068693007  | 0.838952059  | -0.603886043 |
| N | 2.150429155  | 0.472368034  | 0.487745036  |
| H | 3.104483224  | 0.718801053  | 0.683128050  |
| N | -1.782661127 | -0.430802029 | 0.086621008  |
| H | -1.999386145 | -1.369219096 | 0.372964025  |
| H | -2.273226164 | -0.133433012 | -0.734459053 |
| H | 1.893634136  | 1.778453130  | -1.165226082 |
| O | 2.196272161  | -1.154135083 | 2.067074149  |
| O | -2.767611200 | 0.392914028  | -2.779250199 |
| H | -2.487927180 | -0.127040011 | -3.520554255 |
| H | -2.398485171 | 1.262765091  | -2.883930206 |
| O | -1.301681093 | 2.860812204  | -2.413670176 |
| H | -1.718519124 | 3.606978261  | -2.008934143 |
| H | -0.838599061 | 2.381201173  | -1.726077124 |
| O | 4.932379354  | 1.173410083  | 1.257861089  |

|   |              |              |             |
|---|--------------|--------------|-------------|
| H | 5.198404377  | 2.038614145  | 1.537965111 |
| H | 5.173364371  | 0.561798042  | 1.950254139 |
| O | -1.890076134 | -3.474522248 | 0.896023064 |
| H | -2.378016171 | -4.286660309 | 0.867704064 |
| H | -1.253673090 | -3.554072257 | 1.601734113 |
| O | 4.969771357  | -0.902976067 | 3.227326230 |
| H | 4.075088291  | -1.128052079 | 2.993615214 |
| H | 5.462489394  | -1.713302124 | 3.253659233 |
| O | 0.154887011  | -3.452677250 | 3.072916219 |
| H | 0.707699052  | -2.714745196 | 2.843120205 |
| H | -0.005652999 | -3.509028251 | 4.005931286 |

Coord\_4

|   |              |              |              |
|---|--------------|--------------|--------------|
| C | -0.469722031 | -0.152944010 | 0.080620006  |
| N | 0.306298021  | -0.953362070 | 0.891395065  |
| C | 1.597615114  | -0.538016038 | 1.182582085  |
| C | 1.466707108  | 0.923293065  | -0.649501048 |
| N | 0.051405003  | 0.868670061  | -0.559737039 |
| N | 2.138119153  | 0.507925036  | 0.502247038  |
| H | 3.097787222  | 0.739305052  | 0.688946047  |
| N | -1.793795127 | -0.446487033 | 0.083421004  |
| H | -2.007193145 | -1.384301098 | 0.374991027  |
| H | -2.277020164 | -0.157963013 | -0.744143055 |
| H | 1.895593134  | 1.707623121  | -1.246137088 |
| O | 2.195457159  | -1.136003084 | 2.061813148  |
| O | -2.719244198 | 0.389539025  | -2.788252203 |
| H | -2.449835176 | -0.122230007 | -3.539131255 |
| H | -2.360045169 | 1.263169091  | -2.889890208 |
| O | -1.303288093 | 2.891415207  | -2.416842176 |
| H | -1.758250127 | 3.643724260  | -2.069920149 |
| H | -0.849710064 | 2.464725176  | -1.688126119 |
| O | 4.939641354  | 1.168116083  | 1.256040090  |
| H | 5.207210373  | 2.030772145  | 1.542524111  |
| H | 5.172041375  | 0.552381042  | 1.947689142  |
| O | -1.886694135 | -3.483206253 | 0.907559064  |
| H | -2.395293173 | -4.283134311 | 0.909339063  |
| H | -1.248491090 | -3.555748257 | 1.612589115  |
| O | 4.954308358  | -0.913043066 | 3.222365230  |
| H | 4.057670290  | -1.126600080 | 2.984972215  |
| H | 5.438581393  | -1.728605126 | 3.241270235  |
| O | 0.160110012  | -3.442869246 | 3.082740220  |
| H | 0.701314052  | -2.687310192 | 2.883865207  |
| H | 0.069398003  | -3.634524260 | 4.007116289  |

Coord\_5

|   |              |              |             |
|---|--------------|--------------|-------------|
| C | -0.483561032 | -0.162865014 | 0.089442004 |
| N | 0.300646021  | -0.947901067 | 0.890339065 |

|   |              |              |              |
|---|--------------|--------------|--------------|
| C | 1.589123115  | -0.523555037 | 1.187761085  |
| C | 1.455003104  | 0.900618063  | -0.653917048 |
| N | 0.035734001  | 0.891406066  | -0.513717039 |
| N | 2.123940155  | 0.538799041  | 0.517652038  |
| H | 3.088649225  | 0.757509056  | 0.694007051  |
| N | -1.804494128 | -0.464603035 | 0.078428005  |
| H | -2.016228143 | -1.401398100 | 0.375089026  |
| H | -2.279645163 | -0.183394012 | -0.755696053 |
| H | 1.891271138  | 1.619833118  | -1.322115098 |
| O | 2.193830156  | -1.121363083 | 2.059700149  |
| O | -2.672795194 | 0.390867028  | -2.795598199 |
| H | -2.415928176 | -0.110565009 | -3.557872258 |
| H | -2.321005165 | 1.267684090  | -2.892188208 |
| O | -1.297840092 | 2.919333212  | -2.411137174 |
| H | -1.778043129 | 3.679293264  | -2.119983153 |
| H | -0.859898064 | 2.540399184  | -1.647093118 |
| O | 4.943647358  | 1.165811082  | 1.250716090  |
| H | 5.211109378  | 2.027239146  | 1.541031111  |
| H | 5.169247372  | 0.548448038  | 1.943142139  |
| O | -1.887412134 | -3.493929252 | 0.917297063  |
| H | -2.415972171 | -4.280172310 | 0.950674066  |
| H | -1.247772092 | -3.557339255 | 1.622094118  |
| O | 4.941400355  | -0.914448068 | 3.219635231  |
| H | 4.043202293  | -1.118979081 | 2.979821214  |
| H | 5.418886390  | -1.734068124 | 3.233007233  |
| O | 0.160068011  | -3.428481245 | 3.091508221  |
| H | 0.690110052  | -2.659746191 | 2.913183209  |
| H | 0.155406012  | -3.740122268 | 3.987195289  |

Coord\_6

|   |              |              |              |
|---|--------------|--------------|--------------|
| C | -0.496516038 | -0.177868015 | 0.098273009  |
| N | 0.294535019  | -0.947414070 | 0.891194062  |
| C | 1.580374111  | -0.513820038 | 1.195446088  |
| C | 1.441363106  | 0.867575061  | -0.655565049 |
| N | 0.021908002  | 0.907026066  | -0.465537033 |
| N | 2.107857152  | 0.564684042  | 0.534041039  |
| H | 3.077068223  | 0.773197055  | 0.698362052  |
| N | -1.814699131 | -0.485273037 | 0.071668004  |
| H | -2.026489143 | -1.420661104 | 0.373175029  |
| H | -2.280970165 | -0.209764015 | -0.769111056 |
| H | 1.880657133  | 1.514190109  | -1.391761100 |
| O | 2.191424156  | -1.110684079 | 2.060882151  |
| O | -2.627915190 | 0.396234028  | -2.801474204 |
| H | -2.385572171 | -0.092621005 | -3.576642260 |
| H | -2.281286163 | 1.275808093  | -2.891089207 |
| O | -1.285956093 | 2.945085210  | -2.396745172 |
| H | -1.779562127 | 3.714988269  | -2.158742153 |

|   |              |              |              |
|---|--------------|--------------|--------------|
| H | -0.868801064 | 2.608355190  | -1.602483116 |
| O | 4.944524358  | 1.166582083  | 1.241793088  |
| H | 5.210144375  | 2.028164148  | 1.533394110  |
| H | 5.165340372  | 0.550056038  | 1.936483137  |
| O | -1.892394136 | -3.506935254 | 0.924979066  |
| H | -2.440137177 | -4.277888307 | 0.991161074  |
| H | -1.251719087 | -3.559016255 | 1.629955120  |
| O | 4.931853357  | -0.907279066 | 3.218987232  |
| H | 4.032420291  | -1.105451077 | 2.978079216  |
| H | 5.404367391  | -1.729783127 | 3.228658232  |
| O | 0.154434009  | -3.409529243 | 3.098878221  |
| H | 0.674198047  | -2.631750190 | 2.928658209  |
| H | 0.250224018  | -3.821899277 | 3.947488284  |

Coord\_7

|   |              |              |              |
|---|--------------|--------------|--------------|
| C | -0.508536034 | -0.198062017 | 0.107276008  |
| N | 0.287946021  | -0.952106068 | 0.894198064  |
| C | 1.571394111  | -0.509126035 | 1.205914087  |
| C | 1.425753102  | 0.823366059  | -0.653704049 |
| N | 0.010169998  | 0.915359068  | -0.414875032 |
| N | 2.089766148  | 0.585250040  | 0.551549037  |
| H | 3.062951219  | 0.786151055  | 0.702065050  |
| N | -1.824350134 | -0.508545036 | 0.063207005  |
| H | -2.037975147 | -1.442147103 | 0.369238024  |
| H | -2.280865166 | -0.237037016 | -0.784337057 |
| H | 1.863678132  | 1.389695102  | -1.453414107 |
| O | 2.188196159  | -1.104398078 | 2.065626151  |
| O | -2.584209187 | 0.405097027  | -2.805966205 |
| H | -2.358134172 | -0.068853003 | -3.595214259 |
| H | -2.240696162 | 1.287090094  | -2.886753208 |
| O | -1.268025092 | 2.968924211  | -2.373814170 |
| H | -1.763847129 | 3.751540272  | -2.185761155 |
| H | -0.875968061 | 2.668610190  | -1.553884112 |
| O | 4.942265358  | 1.170553082  | 1.229069089  |
| H | 5.204193375  | 2.033723145  | 1.519365108  |
| H | 5.160565372  | 0.557360039  | 1.927475138  |
| O | -1.901811136 | -3.522343255 | 0.930485065  |
| H | -2.467893175 | -4.276292308 | 1.030416072  |
| H | -1.260541091 | -3.560783257 | 1.635990116  |
| O | 4.926414357  | -0.891420063 | 3.220191232  |
| H | 4.026022289  | -1.086094081 | 2.979633214  |
| H | 5.395944386  | -1.715606125 | 3.227941234  |
| O | 0.142881011  | -3.385769243 | 3.104550223  |
| H | 0.653770048  | -2.603499190 | 2.927100211  |
| H | 0.351618025  | -3.876327279 | 3.888840279  |

Coord\_8

|   |              |              |              |
|---|--------------|--------------|--------------|
| C | -0.519568036 | -0.223545018 | 0.116673010  |
| N | 0.280783020  | -0.962141068 | 0.899770067  |
| C | 1.562145114  | -0.509780035 | 1.219636087  |
| C | 1.408122101  | 0.767014053  | -0.647358044 |
| N | 0.000816002  | 0.916145066  | -0.361410027 |
| N | 2.069510148  | 0.600092043  | 0.570409042  |
| H | 3.046125219  | 0.796083056  | 0.705232048  |
| N | -1.833390132 | -0.534357037 | 0.053158003  |
| H | -2.050701146 | -1.465758103 | 0.363384027  |
| H | -2.279240163 | -0.265073017 | -0.801268056 |
| H | 1.840279131  | 1.245124089  | -1.505059108 |
| O | 2.183990158  | -1.102896077 | 2.074456151  |
| O | -2.541442182 | 0.417002028  | -2.809068205 |
| H | -2.333263170 | -0.039653003 | -3.613289261 |
| H | -2.199097158 | 1.301104094  | -2.879287205 |
| O | -1.244232092 | 2.990817216  | -2.342561169 |
| H | -1.731164126 | 3.789286274  | -2.200498160 |
| H | -0.880873063 | 2.720899194  | -1.501135110 |
| O | 4.936726354  | 1.177831084  | 1.212308088  |
| H | 5.192971372  | 2.044061146  | 1.498581110  |
| H | 5.155023373  | 0.570584040  | 1.915873138  |
| O | -1.915831137 | -3.540065253 | 0.933976069  |
| H | -2.499341179 | -4.275196308 | 1.068397076  |
| H | -1.274436090 | -3.562342255 | 1.640258116  |
| O | 4.925701354  | -0.866495063 | 3.223109232  |
| H | 4.024595288  | -1.060747078 | 2.984509217  |
| H | 5.394417387  | -1.691102122 | 3.230727231  |
| O | 0.125107011  | -3.356476240 | 3.108366226  |
| H | 0.629264045  | -2.576249186 | 2.903707211  |
| H | 0.457679031  | -3.899859278 | 3.810809273  |

Coord\_9

|   |              |              |              |
|---|--------------|--------------|--------------|
| C | -0.529542037 | -0.254390019 | 0.126846009  |
| N | 0.272835021  | -0.977579073 | 0.908744067  |
| C | 1.552487111  | -0.516047039 | 1.237500090  |
| C | 1.388496103  | 0.697212050  | -0.635180046 |
| N | -0.005721999 | 0.908987065  | -0.304846022 |
| N | 2.046920148  | 0.608655041  | 0.591065042  |
| H | 3.026375218  | 0.802527059  | 0.708177052  |
| N | -1.841779131 | -0.562413041 | 0.041762002  |
| H | -2.064724147 | -1.491070106 | 0.356032025  |
| H | -2.276141163 | -0.293514019 | -0.819661062 |
| H | 1.810582132  | 1.078764076  | -1.544133111 |
| O | 2.178428156  | -1.106433082 | 2.088467150  |
| O | -2.499930180 | 0.431531029  | -2.810673205 |
| H | -2.311455167 | -0.005452002 | -3.630499264 |
| H | -2.156721157 | 1.317368097  | -2.868863207 |



|   |              |              |              |
|---|--------------|--------------|--------------|
| O | -1.214606088 | 3.010340216  | -2.303562165 |
| H | -1.680633123 | 3.828339274  | -2.202368161 |
| H | -0.882928065 | 2.764339201  | -1.444701103 |
| O | 4.927639354  | 1.188349085  | 1.191418086  |
| H | 5.176057375  | 2.059161150  | 1.470648108  |
| H | 5.148627372  | 0.589957045  | 1.901682139  |
| O | -1.934599139 | -3.559562254 | 0.936294066  |
| H | -2.534552183 | -4.273956308 | 1.105896078  |
| H | -1.293559095 | -3.562773254 | 1.643439117  |
| O | 4.930027357  | -0.831758059 | 3.228082234  |
| H | 4.028457287  | -1.028884072 | 2.993236217  |
| H | 5.400249386  | -1.655444117 | 3.237542235  |
| O | 0.100892008  | -3.319949240 | 3.110590226  |
| H | 0.601719041  | -2.554192184 | 2.849865204  |
| H | 0.567778041  | -3.887802282 | 3.709607267  |

Coord\_10

|   |              |              |              |
|---|--------------|--------------|--------------|
| C | -0.542679037 | -0.313289024 | 0.155888013  |
| N | 0.271979019  | -1.056551078 | 0.892797062  |
| C | 1.549357112  | -0.594863042 | 1.246452091  |
| C | 1.348649098  | 0.646652048  | -0.561765042 |
| N | -0.026274000 | 0.894693067  | -0.165181011 |
| N | 2.014081144  | 0.581812044  | 0.660302048  |
| H | 2.994884218  | 0.779150056  | 0.760245056  |
| N | -1.852298133 | -0.619415046 | 0.041062001  |
| H | -2.072390147 | -1.562821112 | 0.309467020  |
| H | -2.284787163 | -0.304507020 | -0.807365057 |
| H | 1.746071124  | 0.978772071  | -1.500164107 |
| O | 2.190152157  | -1.222662086 | 2.055813146  |
| O | -2.498641178 | 0.572666041  | -2.731083195 |
| H | -2.336800169 | 0.206473014  | -3.590335261 |
| H | -2.159778155 | 1.463796104  | -2.729688199 |
| O | -1.232392090 | 3.126873227  | -2.046259147 |
| H | -1.667943119 | 3.960723288  | -1.927594139 |
| H | -0.925171067 | 2.850878203  | -1.191430088 |
| O | 4.906577354  | 1.166705085  | 1.221135087  |
| H | 5.139989368  | 2.029385145  | 1.536289112  |
| H | 5.143999373  | 0.543479037  | 1.904202139  |
| O | -1.927764137 | -3.653831265 | 0.783632055  |
| H | -2.535338181 | -4.361271316 | 0.955511069  |
| H | -1.281447091 | -3.668203264 | 1.486016109  |
| O | 4.965363358  | -0.932913068 | 3.176402228  |
| H | 4.063382293  | -1.131146083 | 2.943686214  |
| H | 5.446320394  | -1.749595126 | 3.140434225  |
| O | 0.117196007  | -3.450725248 | 2.952999215  |
| H | 0.611185043  | -2.708221192 | 2.620999187  |
| H | 0.741587055  | -4.028244288 | 3.372324241  |

LIIC path connecting S1-MIN and T1-MIN

Coord\_1

|   |              |              |              |
|---|--------------|--------------|--------------|
| C | -0.528514036 | -0.198852015 | 0.053044002  |
| N | 0.272746019  | -0.910152065 | 0.884654066  |
| C | 1.562816111  | -0.642046047 | 1.248051090  |
| C | 1.456630102  | 0.873824062  | -0.582809040 |
| N | 0.070876006  | 0.748146053  | -0.594151045 |
| N | 2.110098154  | 0.394877027  | 0.566599039  |
| H | 3.079049219  | 0.607218045  | 0.725546052  |
| N | -1.853804134 | -0.459780034 | 0.017630000  |
| H | -2.085728150 | -1.385158100 | 0.332370023  |
| H | -2.292495164 | -0.199327015 | -0.848195061 |
| H | 1.847113132  | 1.792133130  | -0.988200073 |
| O | 2.132379151  | -1.281374091 | 2.107923151  |
| O | -2.789862203 | 0.433758029  | -2.797952202 |
| H | -2.500767179 | -0.039636000 | -3.565975258 |
| H | -2.439824174 | 1.317267093  | -2.865880208 |
| O | -1.341935098 | 2.902234209  | -2.304437165 |
| H | -1.692337122 | 3.660765265  | -1.855336134 |
| H | -0.901531063 | 2.370124170  | -1.651441118 |
| O | 4.913998355  | 1.132336081  | 1.249375092  |
| H | 5.124980367  | 2.000144144  | 1.565857113  |
| H | 5.128620371  | 0.515414037  | 1.946282139  |
| O | -1.803395127 | -3.468521251 | 0.881142065  |
| H | -2.442738174 | -4.155033300 | 1.014047074  |
| H | -1.175779083 | -3.528008256 | 1.597332115  |
| O | 4.875443353  | -0.958641068 | 3.189077229  |
| H | 3.977989288  | -1.155925083 | 2.933095212  |
| H | 5.358459386  | -1.774142130 | 3.157625225  |
| O | 0.244686019  | -3.374689245 | 3.029956218  |
| H | 0.891092063  | -2.702802195 | 2.833502202  |
| H | 0.717654050  | -4.099522294 | 3.415423246  |

Coord\_2

|   |              |              |              |
|---|--------------|--------------|--------------|
| C | -0.516689036 | -0.197945015 | 0.058934005  |
| N | 0.284317019  | -0.923457068 | 0.889765067  |
| C | 1.579258114  | -0.639512044 | 1.242646090  |
| C | 1.460093107  | 0.882922064  | -0.582646043 |
| N | 0.074075004  | 0.749060053  | -0.597082041 |
| N | 2.121782155  | 0.394584027  | 0.556344039  |
| H | 3.088089223  | 0.616733043  | 0.717617050  |
| N | -1.846438135 | -0.460919035 | 0.029950004  |
| H | -2.080757149 | -1.391540099 | 0.332251021  |
| H | -2.293936167 | -0.192553011 | -0.829199058 |
| H | 1.846750133  | 1.805036133  | -0.982734069 |
| O | 2.148553152  | -1.276847090 | 2.107837154  |

|   |              |              |              |
|---|--------------|--------------|--------------|
| O | -2.803706200 | 0.435875029  | -2.786106198 |
| H | -2.514503181 | -0.040233002 | -3.552389257 |
| H | -2.449398176 | 1.317160094  | -2.854863204 |
| O | -1.340866097 | 2.892990208  | -2.298463167 |
| H | -1.685597123 | 3.646692262  | -1.837115133 |
| H | -0.894456064 | 2.352184167  | -1.656186118 |
| O | 4.919686355  | 1.141114084  | 1.245565089  |
| H | 5.135981369  | 2.009264144  | 1.557516110  |
| H | 5.141700368  | 0.524931036  | 1.940737140  |
| O | -1.822214131 | -3.485777250 | 0.856935063  |
| H | -2.436228177 | -4.201375304 | 0.951788069  |
| H | -1.197098084 | -3.548998257 | 1.571142112  |
| O | 4.902445352  | -0.950304071 | 3.186358232  |
| H | 4.005354287  | -1.154405085 | 2.935477214  |
| H | 5.389671387  | -1.763562125 | 3.160666227  |
| O | 0.219855017  | -3.375324242 | 3.003508215  |
| H | 0.848670061  | -2.691691193 | 2.810650201  |
| H | 0.631532046  | -4.059473292 | 3.515255254  |

Coord\_3

|   |              |              |              |
|---|--------------|--------------|--------------|
| C | -0.504647037 | -0.197673013 | 0.063775003  |
| N | 0.295523019  | -0.938078066 | 0.893395064  |
| C | 1.594303115  | -0.638206045 | 1.235981092  |
| C | 1.463102104  | 0.891834065  | -0.582490042 |
| N | 0.077095008  | 0.749483057  | -0.600502045 |
| N | 2.132322154  | 0.393843030  | 0.546140042  |
| H | 3.095740221  | 0.625822044  | 0.710543051  |
| N | -1.838024132 | -0.462701035 | 0.041669004  |
| H | -2.074125150 | -1.397868101 | 0.332759026  |
| H | -2.294131163 | -0.186101013 | -0.810505057 |
| H | 1.845851135  | 1.818004129  | -0.976623072 |
| O | 2.163823155  | -1.273827092 | 2.105491153  |
| O | -2.816329204 | 0.437435033  | -2.774560202 |
| H | -2.526768182 | -0.041382005 | -3.538998257 |
| H | -2.457924180 | 1.316659095  | -2.844030205 |
| O | -1.339403096 | 2.883624210  | -2.292145166 |
| H | -1.678664123 | 3.632261260  | -1.818771129 |
| H | -0.887778064 | 2.334014167  | -1.660531119 |
| O | 4.923551354  | 1.150301082  | 1.243228089  |
| H | 5.144546373  | 2.018719144  | 1.551131110  |
| H | 5.153140370  | 0.534639041  | 1.936330141  |
| O | -1.840545132 | -3.501730251 | 0.836070060  |
| H | -2.430257174 | -4.241311306 | 0.896323065  |
| H | -1.216578088 | -3.569055255 | 1.547910114  |
| O | 4.928349357  | -0.942543067 | 3.183805227  |
| H | 4.031869290  | -1.153781084 | 2.937688212  |
| H | 5.420245391  | -1.753199125 | 3.163498230  |

|   |             |              |             |
|---|-------------|--------------|-------------|
| O | 0.198397012 | -3.379544245 | 2.979675214 |
| H | 0.812400057 | -2.688058195 | 2.783767198 |
| H | 0.540840040 | -4.006957287 | 3.604136262 |

Coord\_4

|   |              |              |              |
|---|--------------|--------------|--------------|
| C | -0.492578038 | -0.197692016 | 0.067554006  |
| N | 0.306005021  | -0.953651069 | 0.895640066  |
| C | 1.607622115  | -0.637927047 | 1.228163090  |
| C | 1.465586104  | 0.900540063  | -0.582472044 |
| N | 0.079837003  | 0.749623056  | -0.604533042 |
| N | 2.141588153  | 0.392651027  | 0.535900038  |
| H | 3.101901226  | 0.634322043  | 0.704230051  |
| N | -1.828744131 | -0.464660033 | 0.052715002  |
| H | -2.065905149 | -1.403728099 | 0.333756023  |
| H | -2.293264164 | -0.179539014 | -0.792181056 |
| H | 1.844497134  | 1.830898131  | -0.970091072 |
| O | 2.178007158  | -1.271875089 | 2.101104152  |
| O | -2.828074204 | 0.438631032  | -2.763402198 |
| H | -2.537965181 | -0.042962001 | -3.525872254 |
| H | -2.465674176 | 1.315926095  | -2.833561205 |
| O | -1.337632099 | 2.874251205  | -2.285826165 |
| H | -1.671559120 | 3.617653258  | -1.800688132 |
| H | -0.881545065 | 2.315771168  | -1.664768119 |
| O | 4.925581352  | 1.159416081  | 1.242260092  |
| H | 5.150831369  | 2.028038146  | 1.546495110  |
| H | 5.162782371  | 0.544115039  | 1.933051137  |
| O | -1.857676135 | -3.515933252 | 0.818351057  |
| H | -2.424236174 | -4.275365306 | 0.847233059  |
| H | -1.233751091 | -3.587707261 | 1.527647113  |
| O | 4.952654357  | -0.935551070 | 3.181603230  |
| H | 4.057006294  | -1.154104083 | 2.939903210  |
| H | 5.449507390  | -1.743354126 | 3.166435227  |
| O | 0.180513012  | -3.387882243 | 2.959045213  |
| H | 0.782591058  | -2.691761192 | 2.755139201  |
| H | 0.448021033  | -3.943513284 | 3.681330263  |

Coord\_5

|   |              |              |              |
|---|--------------|--------------|--------------|
| C | -0.480650034 | -0.197683014 | 0.070248005  |
| N | 0.315431022  | -0.969840067 | 0.896575064  |
| C | 1.618920118  | -0.638509047 | 1.219274087  |
| C | 1.467483104  | 0.909031066  | -0.582707041 |
| N | 0.082213004  | 0.749682054  | -0.609291044 |
| N | 2.149462157  | 0.390992030  | 0.525544040  |
| H | 3.106487224  | 0.642064044  | 0.698587048  |
| N | -1.818763133 | -0.466370032 | 0.063009003  |
| H | -2.056128150 | -1.408745102 | 0.335103022  |
| H | -2.291504163 | -0.172471010 | -0.774301057 |

|   |              |              |              |
|---|--------------|--------------|--------------|
| H | 1.842775133  | 1.843607132  | -0.963334071 |
| O | 2.190891158  | -1.270627093 | 2.094872153  |
| O | -2.839276203 | 0.439644030  | -2.752705197 |
| H | -2.548492183 | -0.044846004 | -3.513069255 |
| H | -2.472929180 | 1.315114093  | -2.823603201 |
| O | -1.335673095 | 2.864983205  | -2.279796164 |
| H | -1.664351122 | 3.603033260  | -1.783184128 |
| H | -0.875833063 | 2.297601163  | -1.669148119 |
| O | 4.925770353  | 1.168007083  | 1.242554092  |
| H | 5.154987373  | 2.036768147  | 1.543411112  |
| H | 5.170491372  | 0.552951040  | 1.930873138  |
| O | -1.872821135 | -3.527994254 | 0.803581058  |
| H | -2.417295173 | -4.304019312 | 0.804023059  |
| H | -1.248068087 | -3.604522259 | 1.510359109  |
| O | 4.974926358  | -0.929550067 | 3.179896226  |
| H | 4.080296295  | -1.155458084 | 2.942258213  |
| H | 5.476865393  | -1.734342127 | 3.169732229  |
| O | 0.166435013  | -3.400849244 | 2.942203210  |
| H | 0.759332056  | -2.702658195 | 2.726764198  |
| H | 0.354948026  | -3.870363277 | 3.746430272  |

Coord\_6

|   |              |              |              |
|---|--------------|--------------|--------------|
| C | -0.469027036 | -0.197326016 | 0.071809003  |
| N | 0.323450026  | -0.986320070 | 0.896249065  |
| C | 1.627882115  | -0.639819046 | 1.209372086  |
| C | 1.468743107  | 0.917305065  | -0.583319040 |
| N | 0.084140008  | 0.749868054  | -0.614905043 |
| N | 2.155817153  | 0.388830029  | 0.514987038  |
| H | 3.109407224  | 0.648860045  | 0.693530050  |
| N | -1.808219128 | -0.467411035 | 0.072461003  |
| H | -2.044774149 | -1.412529100 | 0.336677023  |
| H | -2.289013167 | -0.164508014 | -0.756939053 |
| H | 1.840784130  | 1.856032134  | -0.956539070 |
| O | 2.202177160  | -1.269778092 | 2.086974151  |
| O | -2.850302204 | 0.440655034  | -2.742521197 |
| H | -2.558778182 | -0.046903001 | -3.500639251 |
| H | -2.480003179 | 1.314378092  | -2.814285204 |
| O | -1.333684098 | 2.855933205  | -2.274331165 |
| H | -1.657146120 | 3.588563258  | -1.766556125 |
| H | -0.870748061 | 2.279647164  | -1.673912122 |
| O | 4.924100354  | 1.175609085  | 1.244018087  |
| H | 5.157144374  | 2.044439148  | 1.541713110  |
| H | 5.176122374  | 0.560712038  | 1.929782139  |
| O | -1.885056136 | -3.537509253 | 0.791632056  |
| H | -2.408249173 | -4.327648310 | 0.766245053  |
| H | -1.258801093 | -3.619040258 | 1.496100110  |
| O | 4.994720360  | -0.924804067 | 3.178826230  |

|   |             |              |             |
|---|-------------|--------------|-------------|
| H | 4.101258297 | -1.157979084 | 2.944891214 |
| H | 5.501726395 | -1.726524126 | 3.173631228 |
| O | 0.156536012 | -3.419096244 | 2.929795210 |
| H | 0.742639054 | -2.720691196 | 2.700427195 |
| H | 0.263078019 | -3.788316271 | 3.798988273 |

Coord\_7

|   |              |              |              |
|---|--------------|--------------|--------------|
| C | -0.457879034 | -0.196266015 | 0.072136003  |
| N | 0.329647025  | -1.002749071 | 0.894663062  |
| C | 1.634114120  | -0.641752046 | 1.198486084  |
| C | 1.469315105  | 0.925353067  | -0.584460042 |
| N | 0.085533004  | 0.750408053  | -0.621559045 |
| N | 2.160477156  | 0.386100030  | 0.504139037  |
| H | 3.110525222  | 0.654475050  | 0.688987048  |
| N | -1.797234128 | -0.467315032 | 0.080959007  |
| H | -2.031731147 | -1.414611100 | 0.338398024  |
| H | -2.285951162 | -0.155227013 | -0.740182052 |
| H | 1.838655134  | 1.868070134  | -0.949913067 |
| O | 2.211419161  | -1.269072090 | 2.077567152  |
| O | -2.861578204 | 0.441856034  | -2.732897198 |
| H | -2.569334184 | -0.048992002 | -3.488622250 |
| H | -2.487268180 | 1.313885095  | -2.805744204 |
| O | -1.331864098 | 2.847219207  | -2.269746162 |
| H | -1.650084117 | 3.574415260  | -1.751137128 |
| H | -0.866429064 | 2.262061164  | -1.679344121 |
| O | 4.920502357  | 1.181695084  | 1.246612088  |
| H | 5.157391373  | 2.050508150  | 1.541289112  |
| H | 5.179461371  | 0.566890039  | 1.929817139  |
| O | -1.893222135 | -3.543966253 | 0.782545056  |
| H | -2.395533171 | -4.346428313 | 0.733649052  |
| H | -1.264920091 | -3.630698261 | 1.485076105  |
| O | 5.011480361  | -0.921670068 | 3.178580231  |
| H | 4.119300299  | -1.161877083 | 2.947964215  |
| H | 5.523375396  | -1.720357126 | 3.178430231  |
| O | 0.151479009  | -3.443611248 | 2.922604210  |
| H | 0.732596053  | -2.746002199 | 2.677779192  |
| H | 0.173683011  | -3.697715268 | 3.838085275  |

Coord\_8

|   |              |              |              |
|---|--------------|--------------|--------------|
| C | -0.447414030 | -0.194050012 | 0.071018005  |
| N | 0.333450026  | -1.018720075 | 0.891737067  |
| C | 1.637027119  | -0.644227045 | 1.186587084  |
| C | 1.469133105  | 0.933166068  | -0.586351041 |
| N | 0.086287007  | 0.751589055  | -0.629551045 |
| N | 2.163164154  | 0.382700029  | 0.492886035  |
| H | 3.109611222  | 0.658592049  | 0.684901048  |
| N | -1.785901131 | -0.465497033 | 0.088342009  |

|   |              |              |              |
|---|--------------|--------------|--------------|
| H | -2.016739143 | -1.414344104 | 0.340263024  |
| H | -2.282488163 | -0.144111010 | -0.724153051 |
| H | 1.836563132  | 1.879594138  | -0.943731070 |
| O | 2.217881161  | -1.268291093 | 2.066771148  |
| O | -2.873656209 | 0.443480031  | -2.723877198 |
| H | -2.580829183 | -0.050947005 | -3.477063251 |
| H | -2.495211178 | 1.313837093  | -2.798151204 |
| O | -1.330475098 | 2.838989204  | -2.266472164 |
| H | -1.643344119 | 3.560802254  | -1.737381123 |
| H | -0.863067064 | 2.245025160  | -1.685842122 |
| O | 4.914810351  | 1.185586087  | 1.250394091  |
| H | 5.155735371  | 2.054270150  | 1.542136113  |
| H | 5.180135374  | 0.570811042  | 1.931129138  |
| O | -1.895725138 | -3.546603254 | 0.776707056  |
| H | -2.377031171 | -4.360213317 | 0.706411050  |
| H | -1.264866089 | -3.638690261 | 1.477829107  |
| O | 5.024367362  | -0.920666065 | 3.179462227  |
| H | 4.133534299  | -1.167487082 | 2.951721214  |
| H | 5.540783401  | -1.716484125 | 3.184568232  |
| O | 0.152445011  | -3.476021248 | 2.921716208  |
| H | 0.729518051  | -2.779120201 | 2.660445192  |
| H | 0.088230008  | -3.598342258 | 3.861709276  |

Coord\_9

|   |              |              |              |
|---|--------------|--------------|--------------|
| C | -0.437932031 | -0.190005012 | 0.068024005  |
| N | 0.333963026  | -1.033666072 | 0.887214062  |
| C | 1.635631117  | -0.647177044 | 1.173541087  |
| C | 1.468093108  | 0.940735070  | -0.589364044 |
| N | 0.086258008  | 0.753828057  | -0.639414046 |
| N | 2.163379154  | 0.378472029  | 0.481058035  |
| H | 3.106228223  | 0.660741048  | 0.681244047  |
| N | -1.774267127 | -0.461106031 | 0.094343006  |
| H | -1.999235145 | -1.410715102 | 0.342421025  |
| H | -2.278808164 | -0.130442012 | -0.709049052 |
| H | 1.834768131  | 1.890440139  | -0.938410066 |
| O | 2.220281160  | -1.267257091 | 2.054613147  |
| O | -2.887327207 | 0.445849031  | -2.715525193 |
| H | -2.594238186 | -0.052549005 | -3.466029250 |
| H | -2.504531180 | 1.314516097  | -2.791776200 |
| O | -1.329898094 | 2.831460202  | -2.265204165 |
| H | -1.637178119 | 3.548033255  | -1.726015126 |
| H | -0.860948063 | 2.228812159  | -1.694056122 |
| O | 4.906639352  | 1.186277086  | 1.255624093  |
| H | 5.152033374  | 2.054667149  | 1.544472113  |
| H | 5.177424372  | 0.571449039  | 1.934111137  |
| O | -1.890122135 | -3.544118253 | 0.775213057  |
| H | -2.349689170 | -4.368241316 | 0.685573050  |

|   |              |              |             |
|---|--------------|--------------|-------------|
| H | -1.256077090 | -3.641699263 | 1.475610108 |
| O | 5.031911360  | -0.922644066 | 3.182022228 |
| H | 4.142440299  | -1.175392085 | 2.956568213 |
| H | 5.552207401  | -1.715939125 | 3.192794229 |
| O | 0.161591009  | -3.519120254 | 2.928841209 |
| H | 0.734233052  | -2.821327204 | 2.650180190 |
| H | 0.009097001  | -3.489253251 | 3.865538276 |

Coord\_10

|   |              |              |              |
|---|--------------|--------------|--------------|
| C | -0.423898028 | -0.152036010 | 0.053306003  |
| N | 0.319811022  | -0.996880072 | 0.905004064  |
| C | 1.620508115  | -0.606153044 | 1.180635083  |
| C | 1.489371108  | 0.936257066  | -0.624707046 |
| N | 0.107005006  | 0.759349053  | -0.687253050 |
| N | 2.169131157  | 0.388648029  | 0.461328031  |
| H | 3.110036225  | 0.672011047  | 0.668896050  |
| N | -1.759399125 | -0.405889031 | 0.087894007  |
| H | -1.987531141 | -1.344138095 | 0.363768025  |
| H | -2.262516162 | -0.086644006 | -0.720380054 |
| H | 1.870221133  | 1.872892134  | -0.993036070 |
| O | 2.195130159  | -1.198825086 | 2.086624153  |
| O | -2.870002208 | 0.416966028  | -2.755116198 |
| H | -2.577399183 | -0.113193009 | -3.483789253 |
| H | -2.472259178 | 1.276549089  | -2.859336207 |
| O | -1.273743090 | 2.788246202  | -2.379464170 |
| H | -1.571062111 | 3.520601251  | -1.856362135 |
| H | -0.814580060 | 2.190624157  | -1.794270127 |
| O | 4.907009353  | 1.193007083  | 1.250597089  |
| H | 5.165241373  | 2.066870151  | 1.510222110  |
| H | 5.169779370  | 0.597335041  | 1.948988140  |
| O | -1.908706136 | -3.461944250 | 0.868896062  |
| H | -2.353677172 | -4.294625310 | 0.785986058  |
| H | -1.276836094 | -3.549353256 | 1.577374116  |
| O | 5.005178363  | -0.855862061 | 3.243423235  |
| H | 4.115876295  | -1.110795080 | 3.020890216  |
| H | 5.519218396  | -1.651977117 | 3.290351235  |
| O | 0.129721008  | -3.457999249 | 3.051432221  |
| H | 0.705336053  | -2.771724198 | 2.735364196  |
| H | -0.116294008 | -3.217004231 | 3.935135281  |

LIIC path connecting S<sub>2</sub>/S<sub>1</sub>/T<sub>2</sub> and T2-MIN

Coord\_1

|   |              |              |              |
|---|--------------|--------------|--------------|
| C | -0.451273034 | -0.206392013 | 0.003103000  |
| N | 0.335008024  | -1.025556076 | 0.800971056  |
| C | 1.561200115  | -0.634017047 | 1.249789088  |
| C | 1.504268109  | 0.801837060  | -0.576528040 |
| N | 0.103719005  | 0.776500058  | -0.629494047 |



|   |              |              |              |
|---|--------------|--------------|--------------|
| N | 2.086553148  | 0.474402033  | 0.654833049  |
| H | 3.051260222  | 0.693035047  | 0.829636058  |
| N | -1.761930126 | -0.481940035 | -0.002097002 |
| H | -2.016053144 | -1.396358100 | 0.328027023  |
| H | -2.290486164 | -0.124101008 | -0.777553057 |
| H | 1.994073142  | 1.580866114  | -1.135219081 |
| O | 2.132567152  | -1.260817089 | 2.127673152  |
| O | -2.838203206 | 0.497246038  | -2.731611197 |
| H | -2.537536182 | -0.004727003 | -3.476592252 |
| H | -2.441886177 | 1.360718096  | -2.801908204 |
| O | -1.257381088 | 2.873063207  | -2.287704162 |
| H | -1.536893109 | 3.643065260  | -1.810262128 |
| H | -0.797474057 | 2.310325167  | -1.670300122 |
| O | 4.915076353  | 1.160494084  | 1.263647092  |
| H | 5.156067371  | 2.031405147  | 1.548772112  |
| H | 5.158310374  | 0.554636041  | 1.960138143  |
| O | -1.928169138 | -3.446720249 | 0.836115061  |
| H | -2.584562185 | -4.117765299 | 0.966918067  |
| H | -1.286629091 | -3.539599254 | 1.536491109  |
| O | 4.935176357  | -0.916059064 | 3.232391234  |
| H | 4.031943290  | -1.122353083 | 3.011176215  |
| H | 5.419615390  | -1.731207127 | 3.208732232  |
| O | 0.132418007  | -3.422491244 | 2.982061216  |
| H | 0.753433053  | -2.739870199 | 2.750735197  |
| H | 0.630725045  | -4.109244296 | 3.403984244  |

Coord\_2

|   |              |              |              |
|---|--------------|--------------|--------------|
| C | -0.459332033 | -0.205205015 | 0.009320002  |
| N | 0.325690023  | -1.012174073 | 0.814141060  |
| C | 1.561827110  | -0.635481047 | 1.249271092  |
| C | 1.501312109  | 0.810966060  | -0.579184044 |
| N | 0.102479006  | 0.772100055  | -0.627127048 |
| N | 2.093928148  | 0.460926031  | 0.641397048  |
| H | 3.058822218  | 0.679155051  | 0.815843058  |
| N | -1.771931127 | -0.478208034 | -0.000939999 |
| H | -2.024845143 | -1.393300101 | 0.328476024  |
| H | -2.291583164 | -0.132481011 | -0.787987057 |
| H | 1.978827144  | 1.610493118  | -1.119432083 |
| O | 2.132229151  | -1.263074094 | 2.126139152  |
| O | -2.831360204 | 0.495113035  | -2.741040199 |
| H | -2.531840182 | -0.003403001 | -3.488758254 |
| H | -2.439454174 | 1.360272095  | -2.810916203 |
| O | -1.261779091 | 2.879189207  | -2.291680167 |
| H | -1.548054113 | 3.647981264  | -1.816267131 |
| H | -0.803657059 | 2.319096169  | -1.671140122 |
| O | 4.918925355  | 1.152151081  | 1.263199090  |
| H | 5.157987369  | 2.022725148  | 1.550976114  |

|   |              |              |             |
|---|--------------|--------------|-------------|
| H | 5.157767369  | 0.545435040  | 1.960507144 |
| O | -1.917881138 | -3.447710250 | 0.841481061 |
| H | -2.571050184 | -4.122220299 | 0.970605072 |
| H | -1.277535090 | -3.537419256 | 1.543476111 |
| O | 4.928837353  | -0.924398066 | 3.230425235 |
| H | 4.025903288  | -1.128028081 | 3.004853214 |
| H | 5.411646388  | -1.740460125 | 3.205769231 |
| O | 0.141646012  | -3.416556246 | 2.987212217 |
| H | 0.766153055  | -2.735130199 | 2.760447198 |
| H | 0.635976045  | -4.106619297 | 3.408395243 |

Coord\_3

|   |              |              |              |
|---|--------------|--------------|--------------|
| C | -0.467195035 | -0.203741014 | 0.015630001  |
| N | 0.316800025  | -0.998420073 | 0.827058060  |
| C | 1.562509114  | -0.636905047 | 1.248863091  |
| C | 1.498271108  | 0.819924057  | -0.581333043 |
| N | 0.101280006  | 0.767885058  | -0.624522046 |
| N | 2.100882151  | 0.447460031  | 0.628082043  |
| H | 3.065972223  | 0.665283050  | 0.802102056  |
| N | -1.781708126 | -0.474150033 | 0.000400000  |
| H | -2.033364146 | -1.389980101 | 0.328872024  |
| H | -2.291918165 | -0.140125008 | -0.797942056 |
| H | 1.963664141  | 1.639139118  | -1.102513080 |
| O | 2.131877153  | -1.265339089 | 2.124757152  |
| O | -2.823894201 | 0.492441034  | -2.750246200 |
| H | -2.525327184 | -0.002819001 | -3.500483250 |
| H | -2.436562178 | 1.359420099  | -2.819788203 |
| O | -1.266210093 | 2.885336209  | -2.295401167 |
| H | -1.559403113 | 3.652960261  | -1.822272129 |
| H | -0.809934059 | 2.328062167  | -1.671553119 |
| O | 4.922161354  | 1.143974080  | 1.262998093  |
| H | 5.159125370  | 2.014203145  | 1.553536109  |
| H | 5.156682370  | 0.536353041  | 1.961041142  |
| O | -1.907338139 | -3.448307246 | 0.846689060  |
| H | -2.557319182 | -4.126214296 | 0.974113068  |
| H | -1.268257094 | -3.534943257 | 1.550304112  |
| O | 4.922197354  | -0.932793067 | 3.228438232  |
| H | 4.019626288  | -1.133878082 | 2.998482216  |
| H | 5.403520390  | -1.749675127 | 3.202695230  |
| O | 0.150935009  | -3.410510248 | 2.992289218  |
| H | 0.778962055  | -2.730395195 | 2.770097200  |
| H | 0.641170047  | -4.103831295 | 3.412894244  |

Coord\_4

|   |              |              |             |
|---|--------------|--------------|-------------|
| C | -0.474861036 | -0.202015013 | 0.022023002 |
| N | 0.308345021  | -0.984309070 | 0.839704063 |
| C | 1.563258111  | -0.638298048 | 1.248557089 |

|   |              |              |              |
|---|--------------|--------------|--------------|
| C | 1.495163107  | 0.828711062  | -0.582997041 |
| N | 0.100126008  | 0.763844054  | -0.621694043 |
| N | 2.107427153  | 0.434004033  | 0.614879044  |
| H | 3.072716222  | 0.651422046  | 0.788415055  |
| N | -1.791264131 | -0.469784035 | 0.001929999  |
| H | -2.041616146 | -1.386416097 | 0.329234023  |
| H | -2.291520165 | -0.147063009 | -0.807411058 |
| H | 1.948616139  | 1.666803118  | -1.084511079 |
| O | 2.131514153  | -1.267619091 | 2.123525154  |
| O | -2.815801202 | 0.489263034  | -2.759229201 |
| H | -2.517994179 | -0.002936002 | -3.511775252 |
| H | -2.433199177 | 1.358190100  | -2.828517204 |
| O | -1.270661093 | 2.891507210  | -2.298862166 |
| H | -1.570915116 | 3.658003262  | -1.828270131 |
| H | -0.816304056 | 2.337214166  | -1.671543123 |
| O | 4.924771356  | 1.135982080  | 1.263081089  |
| H | 5.159448369  | 2.005858142  | 1.556501111  |
| H | 5.155042371  | 0.527402039  | 1.961771142  |
| O | -1.896556137 | -3.448533247 | 0.851757059  |
| H | -2.543386184 | -4.129767298 | 0.977465072  |
| H | -1.258808089 | -3.532189254 | 1.556991113  |
| O | 4.915246356  | -0.941249070 | 3.226443234  |
| H | 4.013109290  | -1.139917080 | 2.992063217  |
| H | 5.395241390  | -1.758851124 | 3.199523231  |
| O | 0.160287011  | -3.404357245 | 2.997300214  |
| H | 0.791856057  | -2.725668198 | 2.779686199  |
| H | 0.646315046  | -4.100879295 | 3.417493245  |

Coord\_5

|   |              |              |              |
|---|--------------|--------------|--------------|
| C | -0.482324033 | -0.200042013 | 0.028486003  |
| N | 0.300333024  | -0.969857070 | 0.852063061  |
| C | 1.564081114  | -0.639665045 | 1.248347091  |
| C | 1.492003109  | 0.837329062  | -0.584197041 |
| N | 0.099025007  | 0.759966053  | -0.618656047 |
| N | 2.113572150  | 0.420554030  | 0.601781045  |
| H | 3.079063221  | 0.637573044  | 0.774782058  |
| N | -1.800602130 | -0.465126032 | 0.003659001  |
| H | -2.049605146 | -1.382621097 | 0.329577025  |
| H | -2.290410163 | -0.153318011 | -0.816387058 |
| H | 1.933717138  | 1.693481123  | -1.065476075 |
| O | 2.131143152  | -1.269925092 | 2.122437155  |
| O | -2.807077202 | 0.485610033  | -2.767982200 |
| H | -2.509838182 | -0.003720000 | -3.522634255 |
| H | -2.429356175 | 1.356601097  | -2.837095204 |
| O | -1.275119094 | 2.897704208  | -2.302059164 |
| H | -1.582565112 | 3.663107266  | -1.834250130 |
| H | -0.822768057 | 2.346540169  | -1.671113119 |

|   |              |              |             |
|---|--------------|--------------|-------------|
| O | 4.926739356  | 1.128195084  | 1.263486090 |
| H | 5.158923372  | 1.997710146  | 1.559922115 |
| H | 5.152831373  | 0.518597038  | 1.962733144 |
| O | -1.885549133 | -3.448403250 | 0.856704062 |
| H | -2.529269184 | -4.132893296 | 0.980684068 |
| H | -1.249200087 | -3.529171256 | 1.563555112 |
| O | 4.907971355  | -0.949773068 | 3.224454231 |
| H | 4.006343288  | -1.146163080 | 2.985594215 |
| H | 5.386812385  | -1.767985126 | 3.196266229 |
| O | 0.169700010  | -3.398101243 | 3.002251218 |
| H | 0.804829059  | -2.720952197 | 2.789210199 |
| H | 0.651413045  | -4.097762293 | 3.422200244 |

Coord\_6

|   |              |              |              |
|---|--------------|--------------|--------------|
| C | -0.489576037 | -0.197836016 | 0.035009002  |
| N | 0.292774023  | -0.955075070 | 0.864119063  |
| C | 1.564991114  | -0.641013045 | 1.248225089  |
| C | 1.488811106  | 0.845777060  | -0.584951044 |
| N | 0.097983004  | 0.756239052  | -0.615421044 |
| N | 2.119330154  | 0.407108028  | 0.588782044  |
| H | 3.085022223  | 0.623740043  | 0.761204052  |
| N | -1.809722129 | -0.460191036 | 0.005592001  |
| H | -2.057333150 | -1.378609098 | 0.329916022  |
| H | -2.288604166 | -0.158913013 | -0.824862059 |
| H | 1.918999136  | 1.719170123  | -1.045454077 |
| O | 2.130766156  | -1.272265093 | 2.121491155  |
| O | -2.797719199 | 0.481505036  | -2.776495202 |
| H | -2.500859182 | -0.005143000 | -3.533060253 |
| H | -2.425025177 | 1.354672098  | -2.845512203 |
| O | -1.279574094 | 2.903926211  | -2.304986165 |
| H | -1.594330114 | 3.668267263  | -1.840202130 |
| H | -0.829328061 | 2.356030169  | -1.670269118 |
| O | 4.928051356  | 1.120632083  | 1.264252090  |
| H | 5.157513369  | 1.989773143  | 1.563849112  |
| H | 5.150032369  | 0.509950038  | 1.963960142  |
| O | -1.874334137 | -3.447935251 | 0.861544060  |
| H | -2.514988183 | -4.135606298 | 0.983787068  |
| H | -1.239447091 | -3.525903253 | 1.570009111  |
| O | 4.900360352  | -0.958371071 | 3.222484231  |
| H | 3.999325286  | -1.152635082 | 2.979071217  |
| H | 5.378234385  | -1.777076127 | 3.192937228  |
| O | 0.179172013  | -3.391746242 | 3.007146218  |
| H | 0.817873056  | -2.716248197 | 2.798667199  |
| H | 0.656464047  | -4.094477293 | 3.427023245  |

Coord\_7

|   |              |              |             |
|---|--------------|--------------|-------------|
| C | -0.496607035 | -0.195409013 | 0.041584002 |
|---|--------------|--------------|-------------|

|   |              |              |              |
|---|--------------|--------------|--------------|
| N | 0.285683021  | -0.939976066 | 0.875854066  |
| C | 1.566000112  | -0.642348048 | 1.248185088  |
| C | 1.485606107  | 0.854058059  | -0.585278044 |
| N | 0.097009006  | 0.752656056  | -0.612002045 |
| N | 2.124716152  | 0.393663031  | 0.575877041  |
| H | 3.090605223  | 0.609923045  | 0.747681055  |
| N | -1.818621129 | -0.454993033 | 0.007736000  |
| H | -2.064804148 | -1.374391100 | 0.330265025  |
| H | -2.286115165 | -0.163862011 | -0.832827060 |
| H | 1.904493139  | 1.743869127  | -1.024495076 |
| O | 2.130385153  | -1.274648094 | 2.120687155  |
| O | -2.787723200 | 0.476973035  | -2.784756198 |
| H | -2.491056179 | -0.007178998 | -3.543047257 |
| H | -2.420198176 | 1.352418099  | -2.853757207 |
| O | -1.284019093 | 2.910171212  | -2.307639164 |
| H | -1.606193114 | 3.673477267  | -1.846118131 |
| H | -0.835987058 | 2.365670170  | -1.669014121 |
| O | 4.928692353  | 1.113313080  | 1.265416089  |
| H | 5.155182370  | 1.982066142  | 1.568333112  |
| H | 5.146629373  | 0.501472037  | 1.965487141  |
| O | -1.862927134 | -3.447142247 | 0.866290060  |
| H | -2.500562181 | -4.137919300 | 0.986787069  |
| H | -1.229566087 | -3.522400253 | 1.576365112  |
| O | 4.892399351  | -0.967052071 | 3.220548231  |
| H | 3.992046289  | -1.159350082 | 2.972491215  |
| H | 5.369510385  | -1.786125126 | 3.189548229  |
| O | 0.188694013  | -3.385296243 | 3.011987216  |
| H | 0.830977062  | -2.711558195 | 2.808054200  |
| H | 0.661464047  | -4.091024295 | 3.431968248  |

Coord\_8

|   |              |              |              |
|---|--------------|--------------|--------------|
| C | -0.503406037 | -0.192774012 | 0.048200004  |
| N | 0.279073021  | -0.924572065 | 0.887253062  |
| C | 1.567124111  | -0.643675045 | 1.248222088  |
| C | 1.482407109  | 0.862171061  | -0.585194042 |
| N | 0.096114009  | 0.749205053  | -0.608410043 |
| N | 2.129745156  | 0.380218029  | 0.563060040  |
| H | 3.095824223  | 0.596124045  | 0.734215055  |
| N | -1.827293132 | -0.449542032 | 0.010100999  |
| H | -2.072017152 | -1.369976100 | 0.330637026  |
| H | -2.282949166 | -0.168178012 | -0.840270060 |
| H | 1.890233135  | 1.767577125  | -1.002643072 |
| O | 2.130002151  | -1.277086093 | 2.120026154  |
| O | -2.777087198 | 0.472031033  | -2.792752199 |
| H | -2.480432178 | -0.009808999 | -3.552586254 |
| H | -2.414871176 | 1.349849097  | -2.861816207 |
| O | -1.288447095 | 2.916436210  | -2.310013164 |

|   |              |              |              |
|---|--------------|--------------|--------------|
| H | -1.618135115 | 3.678731267  | -1.851989136 |
| H | -0.842748060 | 2.375448169  | -1.667350118 |
| O | 4.928644357  | 1.106254077  | 1.267019089  |
| H | 5.151891369  | 1.974601145  | 1.573427115  |
| H | 5.142604372  | 0.493176035  | 1.967350141  |
| O | -1.851347132 | -3.446040246 | 0.870951064  |
| H | -2.486015178 | -4.139844299 | 0.989695073  |
| H | -1.219572088 | -3.518676253 | 1.582634116  |
| O | 4.884076351  | -0.975826073 | 3.218658232  |
| H | 3.984503285  | -1.166328083 | 2.965850215  |
| H | 5.360642385  | -1.795130130 | 3.186112228  |
| O | 0.198259013  | -3.378756242 | 3.016777218  |
| H | 0.844128059  | -2.706885194 | 2.817367201  |
| H | 0.666406049  | -4.087402294 | 3.437043248  |

Coord\_9

|   |              |              |              |
|---|--------------|--------------|--------------|
| C | -0.509957039 | -0.189939013 | 0.054852005  |
| N | 0.272962018  | -0.908873064 | 0.898297065  |
| C | 1.568379113  | -0.645002047 | 1.248330088  |
| C | 1.479235104  | 0.870118065  | -0.584717042 |
| N | 0.095311009  | 0.745881053  | -0.604655044 |
| N | 2.134435153  | 0.366769026  | 0.550325040  |
| H | 3.100695225  | 0.582346042  | 0.720805052  |
| N | -1.835732133 | -0.443848031 | 0.012692999  |
| H | -2.078971149 | -1.365371099 | 0.331045021  |
| H | -2.279110165 | -0.171867012 | -0.847180062 |
| H | 1.876249134  | 1.790295128  | -0.979944072 |
| O | 2.129618153  | -1.279590091 | 2.119507153  |
| O | -2.765808197 | 0.466691031  | -2.800463200 |
| H | -2.468988175 | -0.013018999 | -3.561664258 |
| H | -2.409039172 | 1.346974099  | -2.869676208 |
| O | -1.292856094 | 2.922714210  | -2.312104166 |
| H | -1.630144115 | 3.684020266  | -1.857808133 |
| H | -0.849616061 | 2.385350171  | -1.665283120 |
| O | 4.927892354  | 1.099472078  | 1.269104089  |
| H | 5.147602371  | 1.967394142  | 1.579186114  |
| H | 5.137939373  | 0.485070034  | 1.969584142  |
| O | -1.839611135 | -3.444640249 | 0.875535062  |
| H | -2.471371177 | -4.141390301 | 0.992518069  |
| H | -1.209488087 | -3.514742254 | 1.588823114  |
| O | 4.875375348  | -0.984701068 | 3.216828232  |
| H | 3.976688285  | -1.173590083 | 2.959142211  |
| H | 5.351633386  | -1.804093128 | 3.182642228  |
| O | 0.207854013  | -3.372129244 | 3.021516217  |
| H | 0.857313060  | -2.702231197 | 2.826603202  |
| H | 0.671282047  | -4.083612294 | 3.442251247  |

Coord\_10

|   |              |              |              |
|---|--------------|--------------|--------------|
| C | -0.523438036 | -0.197572014 | 0.062985005  |
| N | 0.271008021  | -0.896583066 | 0.906102065  |
| C | 1.572471114  | -0.637488047 | 1.239901088  |
| C | 1.455305106  | 0.887513063  | -0.590476041 |
| N | 0.075146006  | 0.738650052  | -0.601153044 |
| N | 2.128303153  | 0.368422027  | 0.527469038  |
| H | 3.093328221  | 0.593078042  | 0.693032052  |
| N | -1.848773135 | -0.461649036 | 0.022822002  |
| H | -2.079924150 | -1.386961102 | 0.338974023  |
| H | -2.286014166 | -0.202093014 | -0.843988059 |
| H | 1.830797132  | 1.825770133  | -0.963882071 |
| O | 2.142177154  | -1.268604091 | 2.107309152  |
| O | -2.780555198 | 0.430916030  | -2.795451199 |
| H | -2.482203181 | -0.043150002 | -3.559686256 |
| H | -2.438437174 | 1.317243095  | -2.865619208 |
| O | -1.346122097 | 2.912755211  | -2.305690167 |
| H | -1.696506123 | 3.669207262  | -1.853003134 |
| H | -0.897228064 | 2.382873172  | -1.657166118 |
| O | 4.911818351  | 1.134911084  | 1.249448092  |
| H | 5.120531367  | 2.004170146  | 1.563281115  |
| H | 5.127314367  | 0.520483036  | 1.948387138  |
| O | -1.798910128 | -3.467212252 | 0.884225062  |
| H | -2.420342175 | -4.173117303 | 1.001618071  |
| H | -1.166579083 | -3.529341254 | 1.596155114  |
| O | 4.881255349  | -0.954130070 | 3.190952231  |
| H | 3.984267288  | -1.150213080 | 2.932180212  |
| H | 5.365362387  | -1.768672125 | 3.152018227  |
| O | 0.255287017  | -3.371531242 | 3.021043217  |
| H | 0.900819066  | -2.697098193 | 2.828276201  |
| H | 0.722873051  | -4.081597293 | 3.439601249  |

LIIC path connecting T2-MIN and T<sub>2</sub>/T<sub>1</sub>

Coord\_1

|   |              |              |              |
|---|--------------|--------------|--------------|
| C | -0.523438036 | -0.197572014 | 0.062985005  |
| N | 0.271008021  | -0.896583066 | 0.906102065  |
| C | 1.572471114  | -0.637488047 | 1.239901088  |
| C | 1.455305106  | 0.887513063  | -0.590476041 |
| N | 0.075146006  | 0.738650052  | -0.601153044 |
| N | 2.128303153  | 0.368422027  | 0.527469038  |
| H | 3.093328221  | 0.593078042  | 0.693032052  |
| N | -1.848773135 | -0.461649036 | 0.022822002  |
| H | -2.079924150 | -1.386961102 | 0.338974023  |
| H | -2.286014166 | -0.202093014 | -0.843988059 |
| H | 1.830797132  | 1.825770133  | -0.963882071 |
| O | 2.142177154  | -1.268604091 | 2.107309152  |
| O | -2.780555198 | 0.430916030  | -2.795451199 |

|   |              |              |              |
|---|--------------|--------------|--------------|
| H | -2.482203181 | -0.043150002 | -3.559686256 |
| H | -2.438437174 | 1.317243095  | -2.865619208 |
| O | -1.346122097 | 2.912755211  | -2.305690167 |
| H | -1.696506123 | 3.669207262  | -1.853003134 |
| H | -0.897228064 | 2.382873172  | -1.657166118 |
| O | 4.911818351  | 1.134911084  | 1.249448092  |
| H | 5.120531367  | 2.004170146  | 1.563281115  |
| H | 5.127314367  | 0.520483036  | 1.948387138  |
| O | -1.798910128 | -3.467212252 | 0.884225062  |
| H | -2.420342175 | -4.173117303 | 1.001618071  |
| H | -1.166579083 | -3.529341254 | 1.596155114  |
| O | 4.881255349  | -0.954130070 | 3.190952231  |
| H | 3.984267288  | -1.150213080 | 2.932180212  |
| H | 5.365362387  | -1.768672125 | 3.152018227  |
| O | 0.255287017  | -3.371531242 | 3.021043217  |
| H | 0.900819066  | -2.697098193 | 2.828276201  |
| H | 0.722873051  | -4.081597293 | 3.439601249  |

Coord\_2

|   |              |              |              |
|---|--------------|--------------|--------------|
| C | -0.519397037 | -0.193336014 | 0.063167004  |
| N | 0.273756017  | -0.898478065 | 0.906533064  |
| C | 1.576031111  | -0.632209044 | 1.236917090  |
| C | 1.457609107  | 0.891582065  | -0.592523041 |
| N | 0.076008004  | 0.745497055  | -0.601279041 |
| N | 2.129803154  | 0.377546027  | 0.527399039  |
| H | 3.095267221  | 0.601468042  | 0.691392047  |
| N | -1.846094133 | -0.456909031 | 0.025160002  |
| H | -2.079257148 | -1.383086101 | 0.338754022  |
| H | -2.286232166 | -0.194846016 | -0.839441062 |
| H | 1.835281131  | 1.825859130  | -0.973400070 |
| O | 2.147362154  | -1.263591089 | 2.104115149  |
| O | -2.782710198 | 0.437616033  | -2.794138199 |
| H | -2.485993180 | -0.037147005 | -3.558571259 |
| H | -2.437942177 | 1.322762096  | -2.864026204 |
| O | -1.343110099 | 2.915438208  | -2.305135166 |
| H | -1.693410124 | 3.671470262  | -1.851782132 |
| H | -0.893833064 | 2.384769171  | -1.657202118 |
| O | 4.915454355  | 1.137346082  | 1.247461089  |
| H | 5.126540371  | 2.006294147  | 1.560595112  |
| H | 5.132217368  | 0.522507039  | 1.945605142  |
| O | -1.815219133 | -3.499016254 | 0.887184063  |
| H | -2.416936174 | -4.223410303 | 0.994469072  |
| H | -1.177855082 | -3.555178254 | 1.594071113  |
| O | 4.888109353  | -0.952067067 | 3.189405229  |
| H | 3.991156287  | -1.149596081 | 2.932064211  |
| H | 5.372602389  | -1.766557125 | 3.153780228  |
| O | 0.250720016  | -3.376672242 | 3.010048216  |



|   |             |              |             |
|---|-------------|--------------|-------------|
| H | 0.884640064 | -2.693412193 | 2.816321203 |
| H | 0.698469052 | -4.065668291 | 3.482727252 |

Coord\_3

|   |              |              |              |
|---|--------------|--------------|--------------|
| C | -0.514026037 | -0.197913016 | 0.068697007  |
| N | 0.279811022  | -0.910386067 | 0.909163064  |
| C | 1.582200112  | -0.635471046 | 1.236178088  |
| C | 1.458522107  | 0.892057066  | -0.587515040 |
| N | 0.075803006  | 0.746533052  | -0.593512042 |
| N | 2.131442153  | 0.380916029  | 0.532286038  |
| H | 3.097095222  | 0.605427044  | 0.694218050  |
| N | -1.841597132 | -0.463286035 | 0.033278005  |
| H | -2.074935151 | -1.391475101 | 0.341768026  |
| H | -2.285780164 | -0.196977013 | -0.827727062 |
| H | 1.836443130  | 1.823738130  | -0.973314068 |
| O | 2.156819155  | -1.268671090 | 2.100857153  |
| O | -2.784867199 | 0.442846034  | -2.792466200 |
| H | -2.489611181 | -0.032326004 | -3.557203256 |
| H | -2.437793176 | 1.326952095  | -2.861880205 |
| O | -1.341047096 | 2.917078208  | -2.303683167 |
| H | -1.691543123 | 3.672454267  | -1.849492133 |
| H | -0.891181065 | 2.385645171  | -1.656466117 |
| O | 4.918812355  | 1.140074081  | 1.245877087  |
| H | 5.131984372  | 2.008690145  | 1.558544111  |
| H | 5.137104368  | 0.524697039  | 1.943027138  |
| O | -1.829448132 | -3.525354253 | 0.888233061  |
| H | -2.413826172 | -4.265283305 | 0.985102068  |
| H | -1.188140087 | -3.577037259 | 1.590843116  |
| O | 4.895561354  | -0.950291069 | 3.187640227  |
| H | 3.998699285  | -1.149503083 | 2.931736211  |
| H | 5.380724386  | -1.764534128 | 3.155048227  |
| O | 0.245737018  | -3.381319243 | 2.999433216  |
| H | 0.869495064  | -2.691134191 | 2.803576202  |
| H | 0.670448048  | -4.046908291 | 3.524575256  |

Coord\_4

|   |              |              |              |
|---|--------------|--------------|--------------|
| C | -0.510590036 | -0.188844013 | 0.064215003  |
| N | 0.280756021  | -0.906135064 | 0.907365068  |
| C | 1.584212112  | -0.624342046 | 1.231192090  |
| C | 1.461656106  | 0.898364065  | -0.595030045 |
| N | 0.077359004  | 0.756428053  | -0.600011042 |
| N | 2.132718153  | 0.394229028  | 0.528364036  |
| H | 3.098827224  | 0.617621045  | 0.689256050  |
| N | -1.839710133 | -0.452831032 | 0.030365000  |
| H | -2.075900148 | -1.381204098 | 0.338074024  |
| H | -2.285931165 | -0.185495015 | -0.829528058 |
| H | 1.842683130  | 1.825207131  | -0.990009071 |

|   |              |              |              |
|---|--------------|--------------|--------------|
| O | 2.159431158  | -1.256370090 | 2.097453151  |
| O | -2.787110201 | 0.446479032  | -2.790278200 |
| H | -2.493176179 | -0.028883002 | -3.555400254 |
| H | -2.438043175 | 1.329671098  | -2.859103205 |
| O | -1.339917097 | 2.917541211  | -2.301405165 |
| H | -1.690852123 | 3.672072264  | -1.846251134 |
| H | -0.889257062 | 2.385404174  | -1.655001121 |
| O | 4.921940353  | 1.143017085  | 1.244606088  |
| H | 5.136947372  | 2.011299142  | 1.556969110  |
| H | 5.142022372  | 0.527018036  | 1.940603141  |
| O | -1.841489132 | -3.545826258 | 0.886938064  |
| H | -2.410957174 | -4.298656307 | 0.972870067  |
| H | -1.197385088 | -3.594677261 | 1.586144112  |
| O | 4.903639351  | -0.948736066 | 3.185719229  |
| H | 4.006912291  | -1.149856081 | 2.931293210  |
| H | 5.389728390  | -1.762559128 | 3.155931228  |
| O | 0.240295018  | -3.385503242 | 2.989173216  |
| H | 0.855344060  | -2.690100195 | 2.790335203  |
| H | 0.638886043  | -4.025356288 | 3.564821255  |

Coord\_5

|   |              |              |              |
|---|--------------|--------------|--------------|
| C | -0.505884036 | -0.188537011 | 0.065342002  |
| N | 0.284950021  | -0.911786063 | 0.908082066  |
| C | 1.588793115  | -0.621681046 | 1.228679091  |
| C | 1.463383108  | 0.900899067  | -0.595465045 |
| N | 0.077816007  | 0.760423055  | -0.598507041 |
| N | 2.134122155  | 0.401716029  | 0.529470037  |
| H | 3.100460223  | 0.625273043  | 0.688756051  |
| N | -1.836084131 | -0.453362035 | 0.033590002  |
| H | -2.073336147 | -1.383006100 | 0.338111024  |
| H | -2.285516163 | -0.183359012 | -0.823816061 |
| H | 1.845636135  | 1.824221131  | -0.997227070 |
| O | 2.166273155  | -1.254004091 | 2.094275151  |
| O | -2.789510200 | 0.448427034  | -2.787453203 |
| H | -2.496791180 | -0.026970000 | -3.553011257 |
| H | -2.438733175 | 1.330816095  | -2.855638205 |
| O | -1.339694096 | 2.916728210  | -2.298376165 |
| H | -1.691276121 | 3.670265262  | -1.842178131 |
| H | -0.888039065 | 2.383974173  | -1.652855117 |
| O | 4.924874355  | 1.146097081  | 1.243570091  |
| H | 5.141503371  | 2.014059146  | 1.555728110  |
| H | 5.147000369  | 0.529434038  | 1.938286139  |
| O | -1.851265131 | -3.560165257 | 0.882986063  |
| H | -2.408242172 | -4.323541312 | 0.957279066  |
| H | -1.205555088 | -3.607946258 | 1.579733114  |
| O | 4.912350355  | -0.947347066 | 3.183697227  |
| H | 4.015792287  | -1.150586081 | 2.930820211  |

|   |             |              |             |
|---|-------------|--------------|-------------|
| H | 5.399594387 | -1.760595129 | 3.156525230 |
| O | 0.234375017 | -3.389258246 | 2.979258212 |
| H | 0.842129060 | -2.690157192 | 2.776849200 |
| H | 0.603913042 | -4.001055288 | 3.603159258 |

Coord\_6

|   |              |              |              |
|---|--------------|--------------|--------------|
| C | -0.501019034 | -0.189473015 | 0.067002005  |
| N | 0.289558022  | -0.918569068 | 0.909165064  |
| C | 1.593664112  | -0.619817046 | 1.226519090  |
| C | 1.464900105  | 0.902774064  | -0.595351044 |
| N | 0.078109007  | 0.763406054  | -0.596376044 |
| N | 2.135477156  | 0.408599027  | 0.531022040  |
| H | 3.101994223  | 0.632578044  | 0.688627049  |
| N | -1.832224132 | -0.455502033 | 0.037410000  |
| H | -2.070269147 | -1.386497098 | 0.338656024  |
| H | -2.284988166 | -0.182863014 | -0.817429061 |
| H | 1.848114135  | 1.822664133  | -1.003796070 |
| O | 2.173607155  | -1.252375093 | 2.091352150  |
| O | -2.792124203 | 0.448634032  | -2.783898201 |
| H | -2.500541178 | -0.026695003 | -3.549923254 |
| H | -2.439894174 | 1.330319097  | -2.851449206 |
| O | -1.340345095 | 2.914566209  | -2.294669167 |
| H | -1.692750123 | 3.666998264  | -1.837383134 |
| H | -0.887502067 | 2.381307172  | -1.650078117 |
| O | 4.927642355  | 1.149243082  | 1.242702087  |
| H | 5.145712372  | 2.016909146  | 1.554704109  |
| H | 5.152057372  | 0.531907036  | 1.936041141  |
| O | -1.858721133 | -3.568201258 | 0.876168064  |
| H | -2.405567171 | -4.340001312 | 0.937970066  |
| H | -1.212614085 | -3.616751260 | 1.571446113  |
| O | 4.921686354  | -0.946083067 | 3.181620228  |
| H | 4.025323288  | -1.151641081 | 2.930389212  |
| H | 5.410288392  | -1.758620128 | 3.156914228  |
| O | 0.227975015  | -3.392621242 | 2.969686216  |
| H | 0.829781058  | -2.691164196 | 2.763331198  |
| H | 0.565708043  | -3.974058284 | 3.639299264  |

Coord\_7

|   |              |              |              |
|---|--------------|--------------|--------------|
| C | -0.496028036 | -0.191606012 | 0.069263005  |
| N | 0.294538019  | -0.926426064 | 0.910705065  |
| C | 1.598787114  | -0.618717045 | 1.224776086  |
| C | 1.466198103  | 0.903939063  | -0.594689043 |
| N | 0.078224008  | 0.765369053  | -0.593599044 |
| N | 2.136767153  | 0.414859030  | 0.533036036  |
| H | 3.103421224  | 0.639497047  | 0.688864051  |
| N | -1.828167132 | -0.459169030 | 0.041920003  |
| H | -2.066763146 | -1.391573099 | 0.339851023  |

|   |              |              |              |
|---|--------------|--------------|--------------|
| H | -2.284390163 | -0.183955014 | -0.810278056 |
| H | 1.850131131  | 1.820459130  | -1.009769073 |
| O | 2.181387156  | -1.251422092 | 2.088773152  |
| O | -2.794999202 | 0.447072033  | -2.779549200 |
| H | -2.504494180 | -0.028135000 | -3.546050253 |
| H | -2.441546175 | 1.328137098  | -2.846520206 |
| O | -1.341837095 | 2.911010212  | -2.290356166 |
| H | -1.695210120 | 3.662257265  | -1.831972133 |
| H | -0.887618062 | 2.377375174  | -1.646723117 |
| O | 4.930261353  | 1.152386083  | 1.241949089  |
| H | 5.149620373  | 2.019790146  | 1.553801111  |
| H | 5.157200371  | 0.534396037  | 1.933840140  |
| O | -1.863800134 | -3.569827256 | 0.866374062  |
| H | -2.402788175 | -4.348120315 | 0.914702068  |
| H | -1.218526090 | -3.621044263 | 1.561186113  |
| O | 4.931623355  | -0.944918068 | 3.179527231  |
| H | 4.035476289  | -1.152977084 | 2.930058211  |
| H | 5.421761389  | -1.756623124 | 3.157168228  |
| O | 0.221103018  | -3.395635245 | 2.960458211  |
| H | 0.818221059  | -2.693001192 | 2.749951200  |
| H | 0.524488040  | -3.944425284 | 3.672971262  |

Coord\_8

|   |              |              |              |
|---|--------------|--------------|--------------|
| C | -0.490944034 | -0.194893012 | 0.072172003  |
| N | 0.299846022  | -0.935305066 | 0.912771063  |
| C | 1.604122115  | -0.618353045 | 1.223502087  |
| C | 1.467265104  | 0.904356066  | -0.593485043 |
| N | 0.078144007  | 0.766311057  | -0.590163043 |
| N | 2.137972153  | 0.420483030  | 0.535520036  |
| H | 3.104727223  | 0.645995048  | 0.689460048  |
| N | -1.823956130 | -0.464283031 | 0.047188005  |
| H | -2.062883150 | -1.398139098 | 0.341799025  |
| H | -2.283761162 | -0.186577013 | -0.802302058 |
| H | 1.851701131  | 1.817543131  | -1.015185075 |
| O | 2.189560156  | -1.251101088 | 2.086607150  |
| O | -2.798174202 | 0.443730030  | -2.774363200 |
| H | -2.508709183 | -0.031339004 | -3.541335257 |
| H | -2.443702176 | 1.324248095  | -2.840847203 |
| O | -1.344135094 | 2.906027209  | -2.285504166 |
| H | -1.698598124 | 3.656038263  | -1.826038130 |
| H | -0.888364064 | 2.372162169  | -1.642840120 |
| O | 4.932736358  | 1.155462085  | 1.241271091  |
| H | 5.153260372  | 2.022644147  | 1.552944113  |
| H | 5.162422372  | 0.536856040  | 1.931662142  |
| O | -1.866438135 | -3.564970255 | 0.853569062  |
| H | -2.399737172 | -4.347968314 | 0.887328062  |
| H | -1.223243086 | -3.620798259 | 1.548907110  |

|   |             |              |             |
|---|-------------|--------------|-------------|
| O | 4.942126354 | -0.943840070 | 3.177455227 |
| H | 4.046207289 | -1.154567082 | 2.929877212 |
| H | 5.433956389 | -1.754605128 | 3.157349227 |
| O | 0.213773014 | -3.398351247 | 2.951580210 |
| H | 0.807364057 | -2.695569194 | 2.736846200 |
| H | 0.480502033 | -3.912220282 | 3.703923268 |

Coord\_9

|   |              |              |              |
|---|--------------|--------------|--------------|
| C | -0.485805035 | -0.199297016 | 0.075761005  |
| N | 0.305433022  | -0.945162066 | 0.915412065  |
| C | 1.609621114  | -0.618704043 | 1.222731086  |
| C | 1.468088107  | 0.903992066  | -0.591745045 |
| N | 0.077854007  | 0.766234057  | -0.586068042 |
| N | 2.139067153  | 0.425453031  | 0.538481037  |
| H | 3.105892222  | 0.652036045  | 0.690410048  |
| N | -1.819632132 | -0.470777036 | 0.053256001  |
| H | -2.058691151 | -1.406109101 | 0.344571025  |
| H | -2.283141162 | -0.190675014 | -0.793463057 |
| H | 1.852830136  | 1.813861132  | -1.020080076 |
| O | 2.198068156  | -1.251378091 | 2.084904152  |
| O | -2.801678202 | 0.438609034  | -2.768319202 |
| H | -2.513232182 | -0.036338004 | -3.535741256 |
| H | -2.446374177 | 1.318645097  | -2.834436205 |
| O | -1.347210096 | 2.899604209  | -2.280174166 |
| H | -1.702864124 | 3.648347264  | -1.819664132 |
| H | -0.889721065 | 2.365662168  | -1.638473117 |
| O | 4.935065357  | 1.158409083  | 1.240641090  |
| H | 5.156650371  | 2.025414146  | 1.552080110  |
| H | 5.167707371  | 0.539242036  | 1.929495140  |
| O | -1.866551136 | -3.553567258 | 0.837787060  |
| H | -2.396216175 | -4.339575314 | 0.855780060  |
| H | -1.226703090 | -3.615991261 | 1.534609111  |
| O | 4.953149354  | -0.942851070 | 3.175431230  |
| H | 4.057469293  | -1.156399083 | 2.929883212  |
| H | 5.446808390  | -1.752580125 | 3.157506229  |
| O | 0.206004015  | -3.400830247 | 2.943054212  |
| H | 0.797121058  | -2.698793196 | 2.724117195  |
| H | 0.434029031  | -3.877506281 | 3.731924270  |

Coord\_10

|   |              |              |              |
|---|--------------|--------------|--------------|
| C | -0.481122033 | -0.200337013 | 0.087795009  |
| N | 0.310631025  | -0.959914067 | 0.918946064  |
| C | 1.616299119  | -0.629660044 | 1.222086088  |
| C | 1.469722106  | 0.906628067  | -0.578271044 |
| N | 0.078042008  | 0.772841057  | -0.567760038 |
| N | 2.142450157  | 0.423339032  | 0.547989040  |
| H | 3.110320224  | 0.647317049  | 0.697115052  |

|   |              |              |              |
|---|--------------|--------------|--------------|
| N | -1.816529132 | -0.470197031 | 0.069111004  |
| H | -2.057527146 | -1.408435099 | 0.350851025  |
| H | -2.285070167 | -0.180279015 | -0.771549055 |
| H | 1.856139134  | 1.815258133  | -1.007523070 |
| O | 2.208162160  | -1.270138091 | 2.077192150  |
| O | -2.810984202 | 0.463666032  | -2.743277195 |
| H | -2.526741183 | -0.006348000 | -3.515281252 |
| H | -2.452660178 | 1.342722096  | -2.803558199 |
| O | -1.348297095 | 2.915883209  | -2.241722163 |
| H | -1.701981123 | 3.660939264  | -1.773874128 |
| H | -0.888927061 | 2.376021173  | -1.606024116 |
| O | 4.943400354  | 1.141648082  | 1.244711087  |
| H | 5.169183373  | 2.005572143  | 1.561671114  |
| H | 5.179072373  | 0.516277035  | 1.926856138  |
| O | -1.872232134 | -3.532496256 | 0.805691057  |
| H | -2.402457175 | -4.318351311 | 0.802108056  |
| H | -1.235569090 | -3.610496258 | 1.502823106  |
| O | 4.969427360  | -0.975730069 | 3.162556226  |
| H | 4.072799293  | -1.187898083 | 2.919762211  |
| H | 5.462683396  | -1.785603130 | 3.139610227  |
| O | 0.195038012  | -3.421536249 | 2.917383210  |
| H | 0.786087057  | -2.721068198 | 2.698070197  |
| H | 0.383311027  | -3.865308280 | 3.735569269  |

LIIC path connecting T<sub>2</sub>/T<sub>1</sub> and T1-MIN  
Coord\_1

|   |              |              |              |
|---|--------------|--------------|--------------|
| C | -0.481122033 | -0.200337013 | 0.087795009  |
| N | 0.310631025  | -0.959914067 | 0.918946064  |
| C | 1.616299119  | -0.629660044 | 1.222086088  |
| C | 1.469722106  | 0.906628067  | -0.578271044 |
| N | 0.078042008  | 0.772841057  | -0.567760038 |
| N | 2.142450157  | 0.423339032  | 0.547989040  |
| H | 3.110320224  | 0.647317049  | 0.697115052  |
| N | -1.816529132 | -0.470197031 | 0.069111004  |
| H | -2.057527146 | -1.408435099 | 0.350851025  |
| H | -2.285070167 | -0.180279015 | -0.771549055 |
| H | 1.856139134  | 1.815258133  | -1.007523070 |
| O | 2.208162160  | -1.270138091 | 2.077192150  |
| O | -2.810984202 | 0.463666032  | -2.743277195 |
| H | -2.526741183 | -0.006348000 | -3.515281252 |
| H | -2.452660178 | 1.342722096  | -2.803558199 |
| O | -1.348297095 | 2.915883209  | -2.241722163 |
| H | -1.701981123 | 3.660939264  | -1.773874128 |
| H | -0.888927061 | 2.376021173  | -1.606024116 |
| O | 4.943400354  | 1.141648082  | 1.244711087  |
| H | 5.169183373  | 2.005572143  | 1.561671114  |
| H | 5.179072373  | 0.516277035  | 1.926856138  |

|   |              |              |             |
|---|--------------|--------------|-------------|
| O | -1.872232134 | -3.532496256 | 0.805691057 |
| H | -2.402457175 | -4.318351311 | 0.802108056 |
| H | -1.235569090 | -3.610496258 | 1.502823106 |
| O | 4.969427360  | -0.975730069 | 3.162556226 |
| H | 4.072799293  | -1.187898083 | 2.919762211 |
| H | 5.462683396  | -1.785603130 | 3.139610227 |
| O | 0.195038012  | -3.421536249 | 2.917383210 |
| H | 0.786087057  | -2.721068198 | 2.698070197 |
| H | 0.383311027  | -3.865308280 | 3.735569269 |

Coord\_2

|   |              |              |              |
|---|--------------|--------------|--------------|
| C | -0.475291034 | -0.197114017 | 0.084677007  |
| N | 0.313662025  | -0.969085069 | 0.913469064  |
| C | 1.618891119  | -0.631777045 | 1.213929085  |
| C | 1.469805108  | 0.914165064  | -0.579592040 |
| N | 0.079036004  | 0.773652058  | -0.576467042 |
| N | 2.145392154  | 0.418706032  | 0.538964038  |
| H | 3.110587226  | 0.649709046  | 0.694440050  |
| N | -1.810507132 | -0.467624034 | 0.072133003  |
| H | -2.048516146 | -1.407762102 | 0.348816026  |
| H | -2.284848166 | -0.171772015 | -0.763080054 |
| H | 1.854057134  | 1.828596130  | -0.998178070 |
| O | 2.210225157  | -1.270892089 | 2.071149147  |
| O | -2.822596203 | 0.466892034  | -2.738510197 |
| H | -2.537748181 | -0.005480001 | -3.508844250 |
| H | -2.461264177 | 1.344717099  | -2.799800200 |
| O | -1.347692097 | 2.910387211  | -2.241486160 |
| H | -1.696023122 | 3.651109262  | -1.762982126 |
| H | -0.885298064 | 2.361968173  | -1.614981118 |
| O | 4.939923357  | 1.143572080  | 1.248276091  |
| H | 5.169496371  | 2.007102142  | 1.563586111  |
| H | 5.178783373  | 0.517678037  | 1.928797139  |
| O | -1.871911135 | -3.533481256 | 0.799198058  |
| H | -2.392378174 | -4.325611311 | 0.781949054  |
| H | -1.235197089 | -3.615377262 | 1.496578106  |
| O | 4.974533359  | -0.976978070 | 3.162983229  |
| H | 4.078576294  | -1.192688085 | 2.921413212  |
| H | 5.470159395  | -1.785524129 | 3.143268228  |
| O | 0.193829017  | -3.439824249 | 2.917251212  |
| H | 0.779796055  | -2.737430200 | 2.687927192  |
| H | 0.355196025  | -3.815522273 | 3.774179274  |

Coord\_3

|   |              |              |              |
|---|--------------|--------------|--------------|
| C | -0.469467031 | -0.194020013 | 0.081649007  |
| N | 0.316492022  | -0.978428069 | 0.907990063  |
| C | 1.621167116  | -0.634139043 | 1.205769087  |
| C | 1.469741104  | 0.921377068  | -0.580710043 |

|   |              |              |              |
|---|--------------|--------------|--------------|
| N | 0.079968006  | 0.774278053  | -0.585033040 |
| N | 2.148103156  | 0.413861028  | 0.530031039  |
| H | 3.110526222  | 0.651779045  | 0.691991049  |
| N | -1.804361130 | -0.465125032 | 0.075202003  |
| H | -2.039254148 | -1.407098101 | 0.346941024  |
| H | -2.284296166 | -0.163242011 | -0.754508055 |
| H | 1.851854132  | 1.841478130  | -0.988531073 |
| O | 2.212301162  | -1.271834094 | 2.064850149  |
| O | -2.833830202 | 0.469924034  | -2.733637195 |
| H | -2.548268182 | -0.004837998 | -3.502229254 |
| H | -2.469492179 | 1.346543100  | -2.795913202 |
| O | -1.346850096 | 2.904698207  | -2.240919163 |
| H | -1.689685123 | 3.641042263  | -1.751912124 |
| H | -0.881867064 | 2.347690171  | -1.623606115 |
| O | 4.936092358  | 1.145697082  | 1.251603092  |
| H | 5.169292373  | 2.008904144  | 1.565126112  |
| H | 5.178428375  | 0.519416035  | 1.930505138  |
| O | -1.871131133 | -3.534370253 | 0.793103058  |
| H | -2.381825173 | -4.332394310 | 0.762641054  |
| H | -1.234656090 | -3.619826261 | 1.491111107  |
| O | 4.980164361  | -0.977807069 | 3.163339228  |
| H | 4.084901296  | -1.197280084 | 2.923173208  |
| H | 5.478331394  | -1.784897128 | 3.146830226  |
| O | 0.192274013  | -3.457496251 | 2.918341211  |
| H | 0.774812057  | -2.754729200 | 2.678891194  |
| H | 0.323213023  | -3.764850271 | 3.806972272  |

Coord\_4

|   |              |              |              |
|---|--------------|--------------|--------------|
| C | -0.463666032 | -0.191007015 | 0.078746004  |
| N | 0.319074021  | -0.987899072 | 0.902580067  |
| C | 1.623103116  | -0.636728048 | 1.197665087  |
| C | 1.469548107  | 0.928202068  | -0.581662043 |
| N | 0.080844006  | 0.774717054  | -0.593475042 |
| N | 2.150588156  | 0.408768030  | 0.521186038  |
| H | 3.110152226  | 0.653467046  | 0.689747052  |
| N | -1.798134132 | -0.462577032 | 0.078365007  |
| H | -2.029806148 | -1.406299102 | 0.345252023  |
| H | -2.283483164 | -0.154568012 | -0.745781054 |
| H | 1.849583131  | 1.853807135  | -0.978658071 |
| O | 2.214316158  | -1.272878092 | 2.058458149  |
| O | -2.844822203 | 0.472797033  | -2.728610196 |
| H | -2.558487182 | -0.004432002 | -3.495380251 |
| H | -2.477434177 | 1.348211098  | -2.791896202 |
| O | -1.345754096 | 2.898786207  | -2.240109162 |
| H | -1.682922122 | 3.630739261  | -1.740771128 |
| H | -0.878612063 | 2.333170167  | -1.631965115 |
| O | 4.931934353  | 1.147954081  | 1.254647089  |



|   |              |              |             |
|---|--------------|--------------|-------------|
| H | 5.168614370  | 2.010928147  | 1.566193114 |
| H | 5.178020374  | 0.521463035  | 1.931974139 |
| O | -1.869877136 | -3.535009256 | 0.787345059 |
| H | -2.370663169 | -4.338653312 | 0.744059053 |
| H | -1.233819090 | -3.623774262 | 1.486240109 |
| O | 4.986299361  | -0.978164068 | 3.163707229 |
| H | 4.091751294  | -1.201614088 | 2.925139212 |
| H | 5.487163394  | -1.783678126 | 3.150429229 |
| O | 0.190618011  | -3.474939250 | 2.920392212 |
| H | 0.771096058  | -2.772882202 | 2.671210192 |
| H | 0.287453019  | -3.713597269 | 3.834035275 |

Coord\_5

|   |              |              |              |
|---|--------------|--------------|--------------|
| C | -0.457879034 | -0.188057016 | 0.076030007  |
| N | 0.321409021  | -0.997470073 | 0.897335064  |
| C | 1.624727118  | -0.639528047 | 1.189693084  |
| C | 1.469266104  | 0.934568065  | -0.582466044 |
| N | 0.081692008  | 0.774941054  | -0.601779045 |
| N | 2.152888157  | 0.403394029  | 0.512436039  |
| H | 3.109509223  | 0.654728049  | 0.687697051  |
| N | -1.791852131 | -0.459888034 | 0.081711005  |
| H | -2.020247143 | -1.405246102 | 0.343824027  |
| H | -2.282459164 | -0.145662012 | -0.736802054 |
| H | 1.847304134  | 1.865488135  | -0.968629072 |
| O | 2.216218158  | -1.273955094 | 2.052164146  |
| O | -2.855681206 | 0.475507034  | -2.723335198 |
| H | -2.568566183 | -0.004314001 | -3.488189251 |
| H | -2.485158181 | 1.349694096  | -2.787707203 |
| O | -1.344374097 | 2.892587207  | -2.239117161 |
| H | -1.675672118 | 3.620168263  | -1.729648123 |
| H | -0.875495061 | 2.318358168  | -1.640096119 |
| O | 4.927503356  | 1.150333082  | 1.257357090  |
| H | 5.167520370  | 2.013181145  | 1.566677115  |
| H | 5.177611373  | 0.523851038  | 1.933189141  |
| O | -1.868234136 | -3.535282253 | 0.781909054  |
| H | -2.358875169 | -4.344349313 | 0.726138053  |
| H | -1.232626087 | -3.627201262 | 1.481793105  |
| O | 4.992996359  | -0.977931071 | 3.164169227  |
| H | 4.099184293  | -1.205586087 | 2.927412209  |
| H | 5.496711398  | -1.781749127 | 3.154193225  |
| O | 0.189122011  | -3.492568251 | 2.923043210  |
| H | 0.768506058  | -2.791771200 | 2.664928191  |
| H | 0.247627017  | -3.661929265 | 3.855131275  |

Coord\_6

|   |              |              |             |
|---|--------------|--------------|-------------|
| C | -0.452060032 | -0.185184012 | 0.073601004 |
| N | 0.323562021  | -1.007139073 | 0.892379065 |

|   |              |              |              |
|---|--------------|--------------|--------------|
| C | 1.626138117  | -0.642530048 | 1.181956084  |
| C | 1.468958107  | 0.940398069  | -0.583125044 |
| N | 0.082562007  | 0.774890058  | -0.609903043 |
| N | 2.155086158  | 0.397710030  | 0.503811037  |
| H | 3.108683225  | 0.655542046  | 0.685840052  |
| N | -1.785517128 | -0.457003034 | 0.085386004  |
| H | -2.010670146 | -1.403857102 | 0.342794026  |
| H | -2.281248163 | -0.136468007 | -0.727417053 |
| H | 1.845081134  | 1.876422133  | -0.958499069 |
| O | 2.217986161  | -1.275023090 | 2.046199149  |
| O | -2.866483206 | 0.478005036  | -2.717671197 |
| H | -2.578632188 | -0.004593999 | -3.480493251 |
| H | -2.492700179 | 1.350919099  | -2.783264199 |
| O | -1.342650096 | 2.885995209  | -2.237976159 |
| H | -1.667850122 | 3.609261259  | -1.718606126 |
| H | -0.872457065 | 2.303168166  | -1.648003117 |
| O | 4.922884353  | 1.152887082  | 1.259677093  |
| H | 5.166082373  | 2.015746147  | 1.566457115  |
| H | 5.177309371  | 0.526687036  | 1.934130140  |
| O | -1.866426133 | -3.535120256 | 0.776853056  |
| H | -2.346625170 | -4.349462313 | 0.708911053  |
| H | -1.231127086 | -3.630148260 | 1.477628104  |
| O | 5.000406359  | -0.976917072 | 3.164805229  |
| H | 4.107358298  | -1.209034089 | 2.930105213  |
| H | 5.507141397  | -1.778905127 | 3.158248225  |
| O | 0.188050015  | -3.510815251 | 2.925827212  |
| H | 0.766770055  | -2.811247203 | 2.659832193  |
| H | 0.203064017  | -3.609869262 | 3.869579280  |

Coord\_7

|   |              |              |              |
|---|--------------|--------------|--------------|
| C | -0.446120033 | -0.182452013 | 0.071606006  |
| N | 0.325681021  | -1.016940076 | 0.887870062  |
| C | 1.627521116  | -0.645727046 | 1.174583084  |
| C | 1.468714108  | 0.945604067  | -0.583610040 |
| N | 0.083536005  | 0.774460053  | -0.617759044 |
| N | 2.157315153  | 0.391699026  | 0.495371036  |
| H | 3.107807225  | 0.655928049  | 0.684194051  |
| N | -1.779103129 | -0.453917031 | 0.089605007  |
| H | -2.001188142 | -1.402100101 | 0.342380024  |
| H | -2.279839165 | -0.126975007 | -0.717406052 |
| H | 1.842978131  | 1.886514136  | -0.948302066 |
| O | 2.219643157  | -1.276075089 | 2.040829148  |
| O | -2.877250206 | 0.480183035  | -2.711413195 |
| H | -2.588763186 | -0.005454002 | -3.472062251 |
| H | -2.500045180 | 1.351750098  | -2.778435203 |
| O | -1.340490095 | 2.878855206  | -2.236688163 |

|   |              |              |              |
|---|--------------|--------------|--------------|
| H | -1.659339121 | 3.597909258  | -1.707687125 |
| H | -0.869405062 | 2.287468165  | -1.655653121 |
| O | 4.918199356  | 1.155763081  | 1.261550089  |
| H | 5.164386371  | 2.018801145  | 1.565411111  |
| H | 5.177279372  | 0.530179040  | 1.934777138  |
| O | -1.864880137 | -3.534510252 | 0.772337058  |
| H | -2.334351169 | -4.353982313 | 0.692552051  |
| H | -1.229531088 | -3.632735260 | 1.473656105  |
| O | 5.008796358  | -0.974832071 | 3.165701227  |
| H | 4.116549297  | -1.211727088 | 2.933340211  |
| H | 5.518760399  | -1.774829129 | 3.162720228  |
| O | 0.187639013  | -3.530092252 | 2.928168212  |
| H | 0.765464056  | -2.831147205 | 2.655352189  |
| H | 0.152714013  | -3.557306255 | 3.876075280  |

Coord\_8

|   |              |              |              |
|---|--------------|--------------|--------------|
| C | -0.439915033 | -0.179982014 | 0.070243004  |
| N | 0.328017021  | -1.026952072 | 0.883998061  |
| C | 1.629169117  | -0.649120046 | 1.167734086  |
| C | 1.468656105  | 0.950094067  | -0.583858044 |
| N | 0.084730004  | 0.773501057  | -0.625207044 |
| N | 2.159774155  | 0.385363029  | 0.487209037  |
| H | 3.107067223  | 0.655956047  | 0.682802051  |
| N | -1.772546126 | -0.450693034 | 0.094668005  |
| H | -1.991945146 | -1.400007099 | 0.342910027  |
| H | -2.278174162 | -0.117232007 | -0.706469053 |
| H | 1.841055132  | 1.895678136  | -0.938042066 |
| O | 2.221267160  | -1.277155093 | 2.036349144  |
| O | -2.887923208 | 0.481852033  | -2.704294194 |
| H | -2.598949186 | -0.007170002 | -3.462584247 |
| H | -2.507105183 | 1.351978099  | -2.773029202 |
| O | -1.337746094 | 2.870954209  | -2.235211161 |
| H | -1.649973117 | 3.585952260  | -1.696903122 |
| H | -0.866200063 | 2.271077165  | -1.662958121 |
| O | 4.913610352  | 1.159226085  | 1.262935089  |
| H | 5.162523371  | 2.022653148  | 1.563430115  |
| H | 5.177754372  | 0.534662039  | 1.935117140  |
| O | -1.864310133 | -3.533517256 | 0.768675056  |
| H | -2.322909166 | -4.357912316 | 0.677454048  |
| H | -1.228290088 | -3.635181260 | 1.469887104  |
| O | 5.018567362  | -0.971267068 | 3.166943227  |
| H | 4.127178298  | -1.213342090 | 2.937251212  |
| H | 5.532038398  | -1.769058128 | 3.167729230  |
| O | 0.188062011  | -3.550733255 | 2.929383209  |
| H | 0.763980053  | -2.851310207 | 2.650425189  |
| H | 0.095214005  | -3.504003252 | 3.872474276  |

## Coord\_9

|   |              |              |              |
|---|--------------|--------------|--------------|
| C | -0.433239033 | -0.177968013 | 0.069762003  |
| N | 0.330954024  | -1.037317072 | 0.880974062  |
| C | 1.631499116  | -0.652723050 | 1.161596085  |
| C | 1.468940104  | 0.953780067  | -0.583758040 |
| N | 0.086302004  | 0.771801054  | -0.632047047 |
| N | 2.162730155  | 0.378729030  | 0.479466037  |
| H | 3.106711225  | 0.655768047  | 0.681748051  |
| N | -1.765727127 | -0.447488030 | 0.100965008  |
| H | -1.983116141 | -1.397698098 | 0.344851023  |
| H | -2.276117165 | -0.107366010 | -0.694215049 |
| H | 1.839353134  | 1.903856137  | -0.927672065 |
| O | 2.223014159  | -1.278386091 | 2.033066145  |
| O | -2.898315207 | 0.482729033  | -2.695978195 |
| H | -2.609047190 | -0.010132003 | -3.451665246 |
| H | -2.513676183 | 1.351299096  | -2.766800198 |
| O | -1.334202093 | 2.862016204  | -2.233453160 |
| H | -1.639535117 | 3.573173259  | -1.686231120 |
| H | -0.862642060 | 2.253761162  | -1.669768119 |
| O | 4.909310353  | 1.163697083  | 1.263831092  |
| H | 5.160576374  | 2.027771144  | 1.560455112  |
| H | 5.179035373  | 0.540634037  | 1.935166142  |
| O | -1.865822136 | -3.532303255 | 0.766406055  |
| H | -2.313765168 | -4.361258315 | 0.664338046  |
| H | -1.228211087 | -3.637833263 | 1.466494104  |
| O | 5.030269360  | -0.965667071 | 3.168627228  |
| H | 4.139829297  | -1.213458085 | 2.941981210  |
| H | 5.547635400  | -1.760960129 | 3.173388230  |
| O | 0.189360014  | -3.572873258 | 2.928699210  |
| H | 0.761517055  | -2.871645208 | 2.643305188  |
| H | 0.029059001  | -3.449626247 | 3.855532275  |

## Coord\_10

|   |              |              |              |
|---|--------------|--------------|--------------|
| C | -0.423898028 | -0.152036010 | 0.053306003  |
| N | 0.319811022  | -0.996880072 | 0.905004064  |
| C | 1.620508115  | -0.606153044 | 1.180635083  |
| C | 1.489371108  | 0.936257066  | -0.624707046 |
| N | 0.107005006  | 0.759349053  | -0.687253050 |
| N | 2.169131157  | 0.388648029  | 0.461328031  |
| H | 3.110036225  | 0.672011047  | 0.668896050  |
| N | -1.759399125 | -0.405889031 | 0.087894007  |
| H | -1.987531141 | -1.344138095 | 0.363768025  |
| H | -2.262516162 | -0.086644006 | -0.720380054 |
| H | 1.870221133  | 1.872892134  | -0.993036070 |
| O | 2.195130159  | -1.198825086 | 2.086624153  |
| O | -2.870002208 | 0.416966028  | -2.755116198 |
| H | -2.577399183 | -0.113193009 | -3.483789253 |

|   |              |              |              |
|---|--------------|--------------|--------------|
| H | -2.472259178 | 1.276549089  | -2.859336207 |
| O | -1.273743090 | 2.788246202  | -2.379464170 |
| H | -1.571062111 | 3.520601251  | -1.856362135 |
| H | -0.814580060 | 2.190624157  | -1.794270127 |
| O | 4.907009353  | 1.193007083  | 1.250597089  |
| H | 5.165241373  | 2.066870151  | 1.510222110  |
| H | 5.169779370  | 0.597335041  | 1.948988140  |
| O | -1.908706136 | -3.461944250 | 0.868896062  |
| H | -2.353677172 | -4.294625310 | 0.785986058  |
| H | -1.276836094 | -3.549353256 | 1.577374116  |
| O | 5.005178363  | -0.855862061 | 3.243423235  |
| H | 4.115876295  | -1.110795080 | 3.020890216  |
| H | 5.519218396  | -1.651977117 | 3.290351235  |
| O | 0.129721008  | -3.457999249 | 3.051432221  |
| H | 0.705336053  | -2.771724198 | 2.735364196  |
| H | -0.116294008 | -3.217004231 | 3.935135281  |
